# Supplementary material for: Resolving Discrepancy between Nucleotides and Amino Acids in Deep-Level Arthropod Phylogenomics: Differentiating Serine Codons in 21-Amino-Acid Models
Source: PubMed Central journal article supplement (PMC3502419; doi:10.1371/journal.pone.0047450), 2012-11-20

**Figure S1. Arthropod relationships and classification scheme based on *degen1* analysis of 75 ingroup plus five outgroup species [5].**

Nodes that receive bootstrap support of at least 80% by one of four approaches [5] are arbitrarily numbered for convenient reference. Six groups that show major differences in their bootstrap values between *degen1* and 20AA analyses are in boldface with filled circles identifying their nodes. Edafopoda is a newly proposed name (see text).

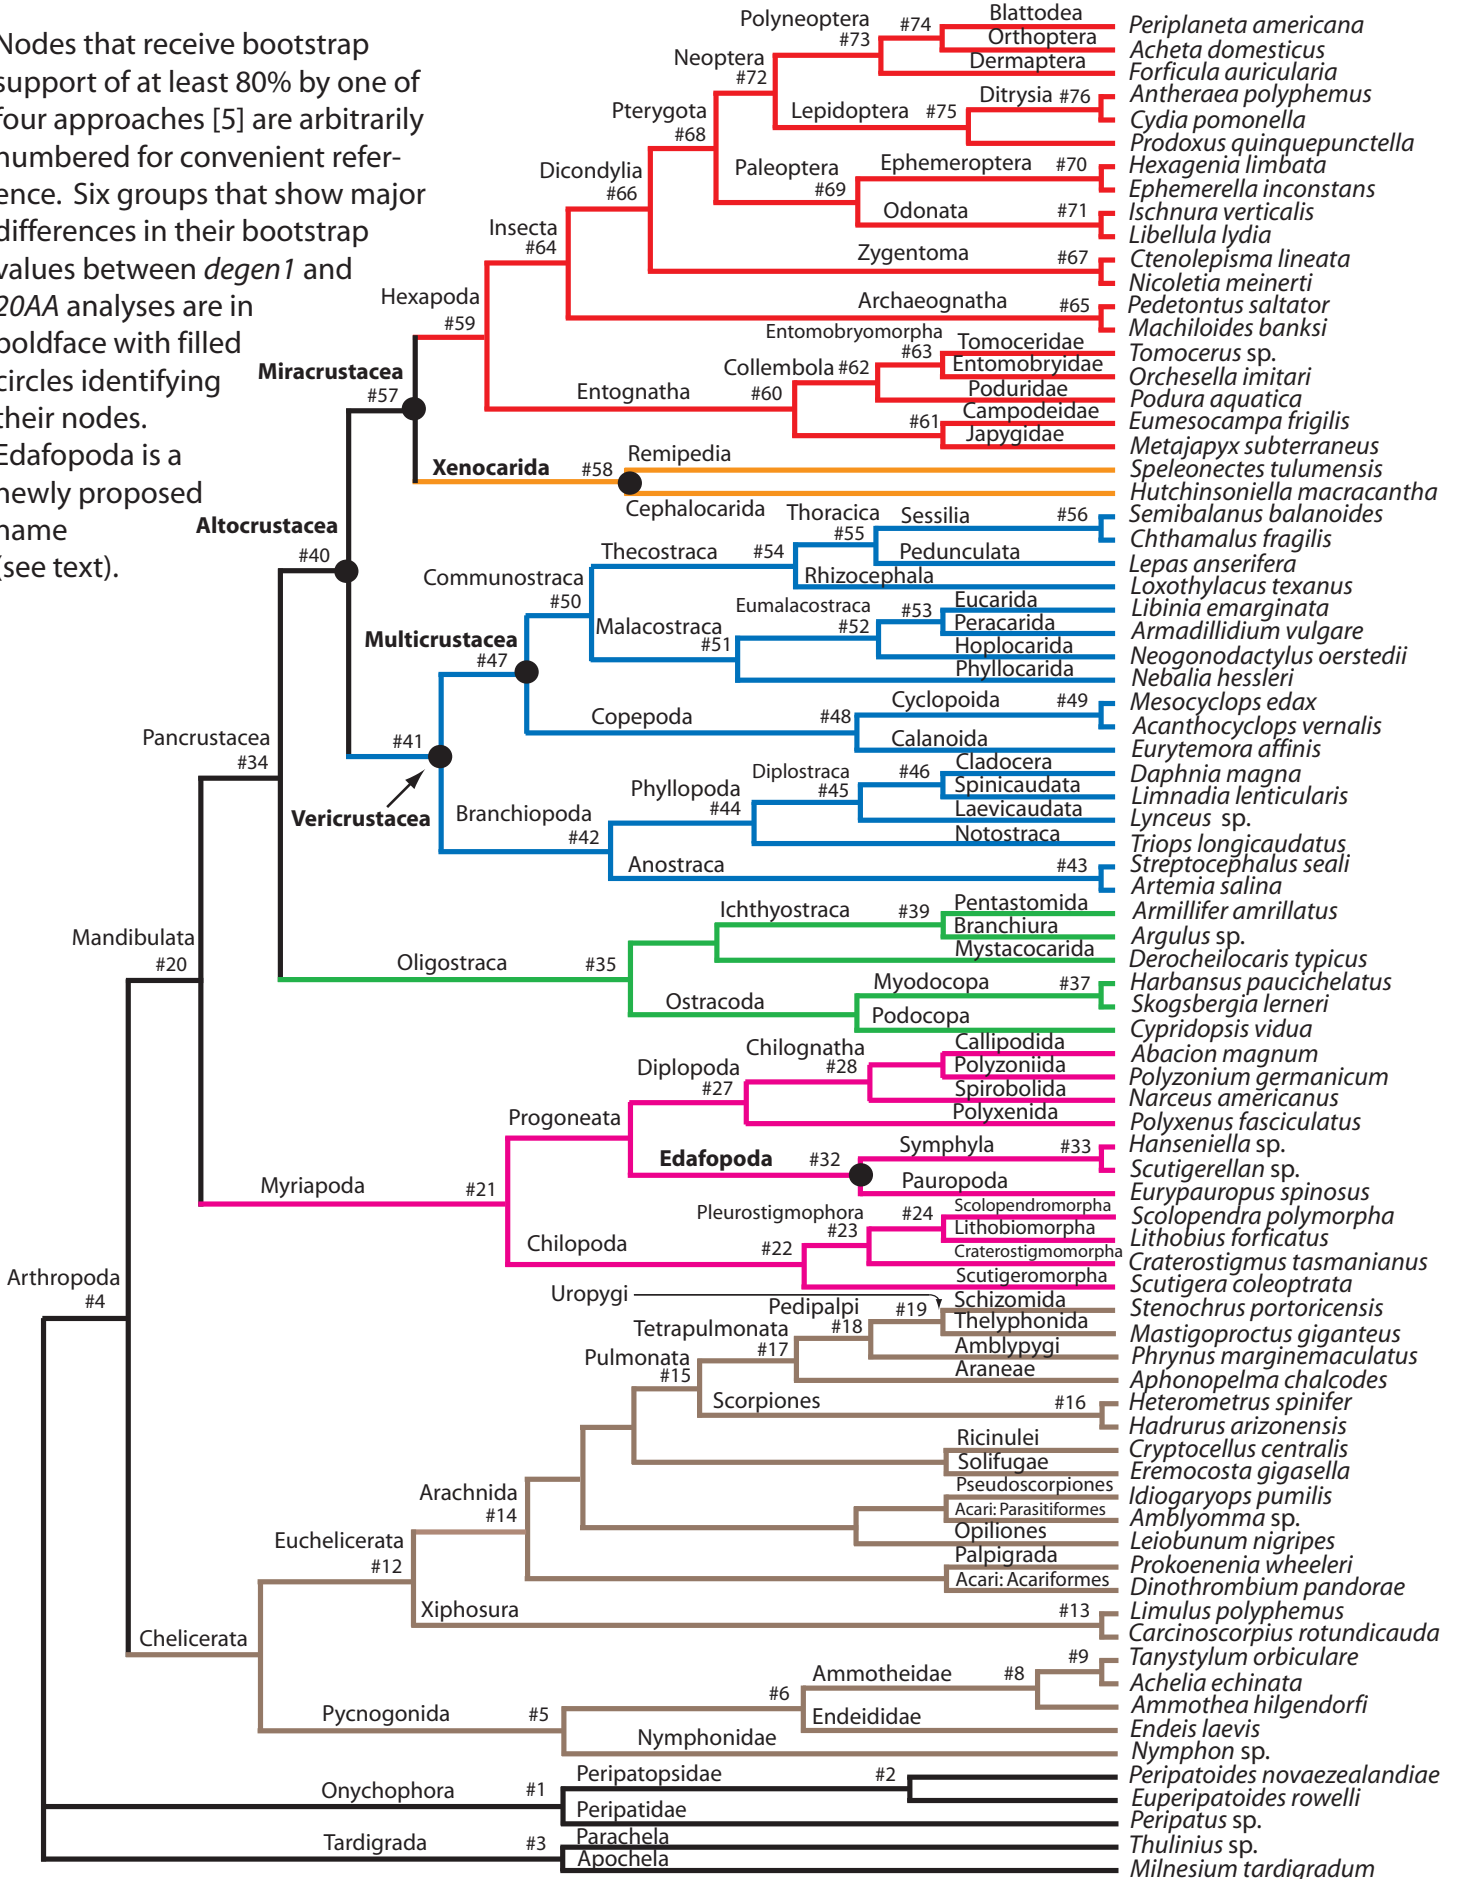

Supplement: pone.0047450.s001.pdf [file pone.0047450.s001.pdf]
