# Supplementary material for: Resolving Discrepancy between Nucleotides and Amino Acids in Deep-Level Arthropod Phylogenomics: Differentiating Serine Codons in 21-Amino-Acid Models
Source: PubMed Central journal article supplement (PMC3502419; doi:10.1371/journal.pone.0047450), 2012-11-20
Supplement: pone.0047450.s002.pdf [file pone.0047450.s002.pdf]

**Figure S2. Strict consensus of four maximum parsimony trees for 21AA data set plus bootstrap values (above branches) from 20AA (left) and 21AA (right) analyses.**

MP topology based on 250 search replicates.  
 Bootstrap results based on 1000 bootstrap replicates (5 search reps / bootstrap rep).

# : bootstrap percentage (20AA 21AA)

[ ] : node not present in 20AA  
 MP strict consensus

● : Identifies 6 taxa with large differences in BP between *degen1* and 20AA analyses.

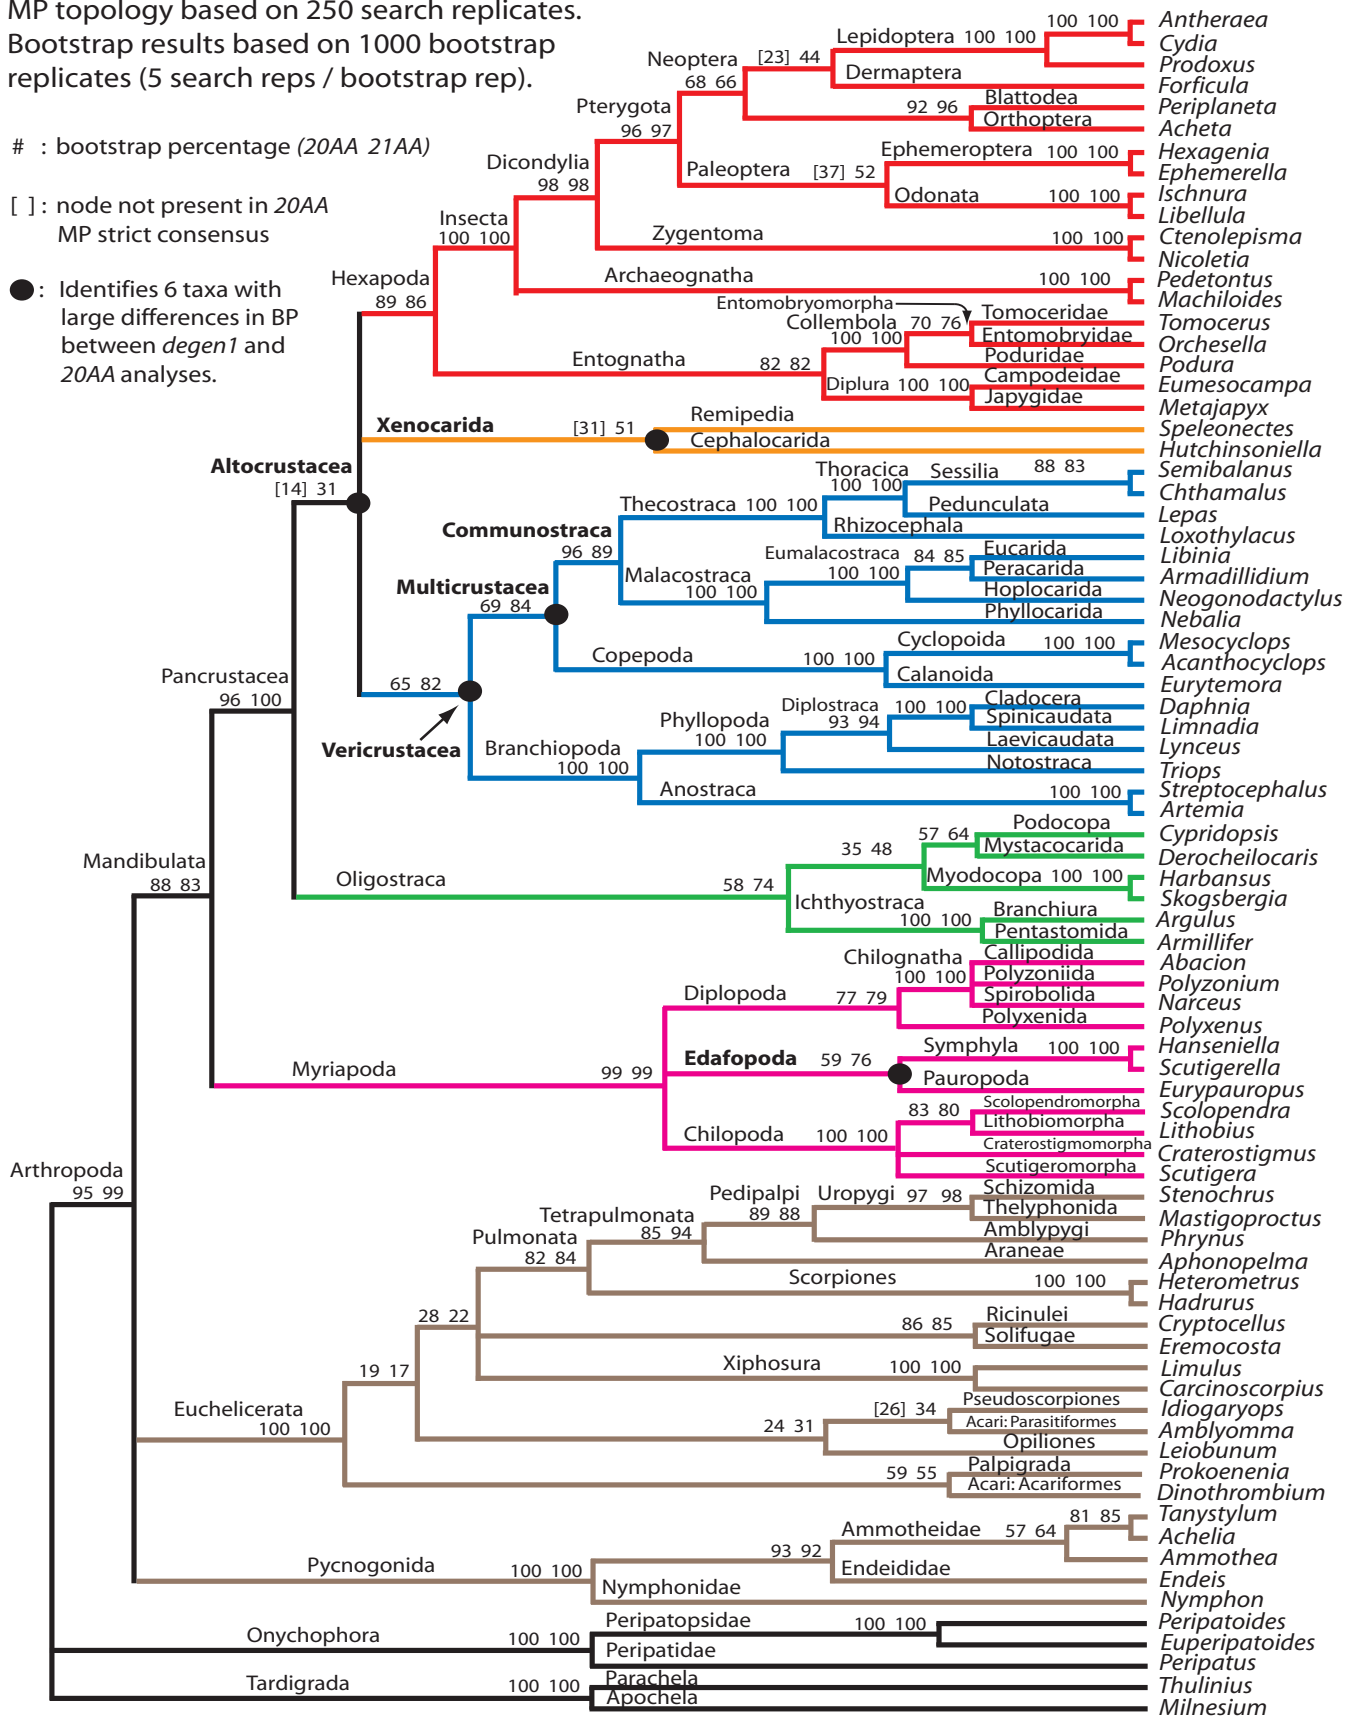

**Commentary on Figure S2:** Miracrustacea (BP, 24%), Progoneata (BP, 33%), and Chelicerata (BP, 57%) are all present in subsets of the four MP trees for the 21AA analysis. Miracrustacea (BP, 12%) and Xenocarida (BP, 31%) are both present in subsets of the five MP trees for the 20AA analysis, but not Altocrustacea (BP, 14%) and Chelicerata (40%). Progoneata (BP, 35%) is present in the strict consensus of the 20AA analysis.
