# Supplementary material for: Resolving Discrepancy between Nucleotides and Amino Acids in Deep-Level Arthropod Phylogenomics: Differentiating Serine Codons in 21-Amino-Acid Models
Source: PubMed Central journal article supplement (PMC3502419; doi:10.1371/journal.pone.0047450), 2012-11-20

**Figure S5. Compositional distance tree (Euclidean distances) based on the amino acid composition of a 21-amino acid data set that is restricted to *co-SER (S/Z)* residues. Bootstrap percentages >50% are displayed and indicate the strength of the compositional signal at particular nodes. The sum of all branch lengths reflects the total amount of compositional heterogeneity in the data set.**

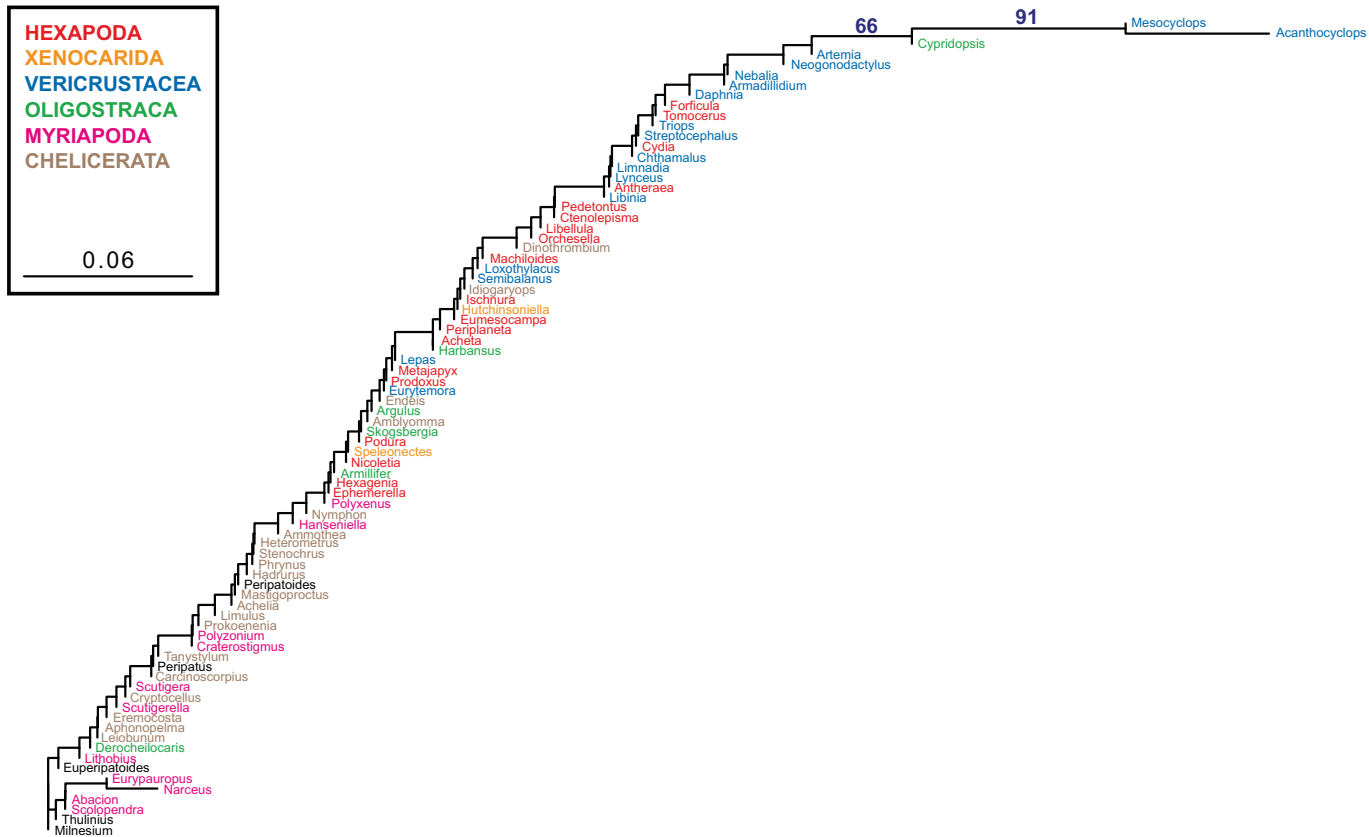

Supplement: pone.0047450.s005.pdf [file pone.0047450.s005.pdf]
