# Supplementary material for: Resolving Discrepancy between Nucleotides and Amino Acids in Deep-Level Arthropod Phylogenomics: Differentiating Serine Codons in 21-Amino-Acid Models
Source: PubMed Central journal article supplement (PMC3502419; doi:10.1371/journal.pone.0047450), 2012-11-20

**Figure S6. Proportions of the six distinct Ser codons for each of the 80 taxa in this study.** Taxa are clustered by their higher-level classification to demonstrate that, in general, there is substantial variation in codon usage within higher-level groups, as well as across them.

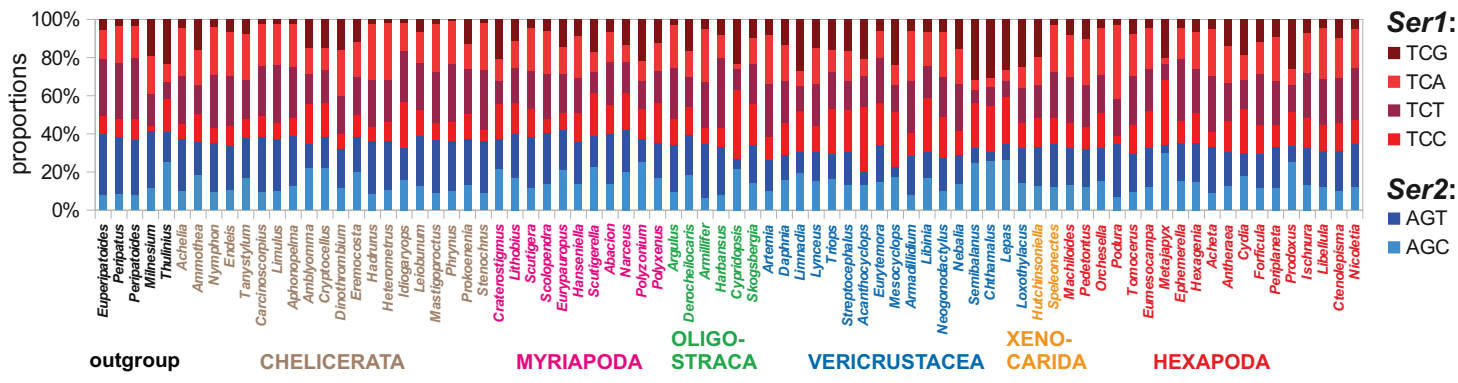

Supplement: pone.0047450.s006.pdf [file pone.0047450.s006.pdf]
