# Supplementary material for: Resolving Discrepancy between Nucleotides and Amino Acids in Deep-Level Arthropod Phylogenomics: Differentiating Serine Codons in 21-Amino-Acid Models
Source: PubMed Central journal article supplement (PMC3502419; doi:10.1371/journal.pone.0047450), 2012-11-20
Supplement: pone.0047450.s008.pdf [file pone.0047450.s008.pdf]

**Table S1.** Bootstrap percentages for 80-taxon likelihood analyses.

| node index # | taxonomic group                    | standard<br>[* = Regier <i>et al.</i> 2010] |              |        |                   |        | GTR  |      |                      | ECM  |      |                      | JTT  |      |                      |
|--------------|------------------------------------|---------------------------------------------|--------------|--------|-------------------|--------|------|------|----------------------|------|------|----------------------|------|------|----------------------|
|              |                                    | degen1*                                     | degenFS<br>2 | degen8 | noLRall1<br>+nt2* | codon* | 20AA | 21AA | Δ<br>(21AA-<br>20AA) | 20AA | 21AA | Δ<br>(21AA-<br>20AA) | 20AA | 21AA | Δ<br>(21AA-<br>20AA) |
| 32           | Edafopoda (=Symphyla + Pauropoda)  | 92                                          | 57           | 88     | 92                | 97     | 59   | 80   | 21                   | 70   | 87   | 17                   | 64   | 89   | 25                   |
| 40           | Altocrustacea                      | 93                                          | 25           | 90     | 89                | 81     | 16   | 58   | 41                   | 6    | 52   | 46                   | 20   | 66   | 46                   |
| 41           | Vericrustacea                      | 86                                          | 25           | 84     | 88                | 80     | 13   | 40   | 27                   | 15   | 54   | 39                   | 24   | 64   | 40                   |
| 47           | Multicrustacea                     | 100                                         | 84           | 100    | 100               | 98     | 37   | 74   | 37                   | 43   | 86   | 43                   | 52   | 90   | 38                   |
| 57           | Miracrustacea                      | 94                                          | 25           | 92     | 98                | 79     | 10   | 45   | 35                   | 8    | 42   | 34                   | 16   | 66   | 50                   |
| 58           | Xenocarida                         | 93                                          | 57           | 90     | 100               | 89     | 39   | 70   | 31                   | 27   | 64   | 36                   | 55   | 87   | 32                   |
| 1            | Onychophora                        | 100                                         | 100          | 100    | 100               | 100    | 100  | 100  | 0                    | 100  | 100  | 0                    | 100  | 100  | 0                    |
| 2            | Peripatopsidae                     | 100                                         | 100          | 100    | 100               | 100    | 100  | 100  | 0                    | 100  | 100  | 0                    | 100  | 100  | 0                    |
| 3            | Tardigrada                         | 100                                         | 100          | 100    | 100               | 100    | 100  | 100  | 0                    | 100  | 100  | 0                    | 100  | 100  | 0                    |
| 4            | Arthropoda                         | 100                                         | 100          | 100    | 100               | 100    | 100  | 100  | 0                    | 100  | 100  | 0                    | 100  | 100  | 0                    |
| 5            | Pycnogonida                        | 100                                         | 100          | 100    | 100               | 100    | 100  | 100  | 0                    | 100  | 100  | 0                    | 100  | 100  | 0                    |
| 6            | Ammotheidae + Endeididae           | 93                                          | 93           | 95     | 76                | 100    | 88   | 90   | 1                    | 95   | 97   | 2                    | 93   | 96   | 4                    |
| 8            | Ammotheidae                        | 99                                          | 98           | 97     | 99                | 100    | 88   | 94   | 7                    | 90   | 95   | 5                    | 89   | 96   | 7                    |
| 9            | Tanystylum + Achelia               | 98                                          | 92           | 99     | 99                | 97     | 99   | 98   | 0                    | 96   | 97   | 2                    | 97   | 98   | 1                    |
| 12           | Euchelicerata                      | 100                                         | 100          | 100    | 100               | 100    | 100  | 100  | 0                    | 100  | 100  | 0                    | 100  | 100  | 0                    |
| 13           | Xiphosura                          | 100                                         | 100          | 100    | 100               | 100    | 100  | 100  | 0                    | 100  | 100  | 0                    | 100  | 100  | 0                    |
| 14           | Arachnida                          | 68                                          | 76           | 57     | 80                | 39     | 17   | 22   | 4                    | 24   | 15   | -9                   | 17   | 13   | -4                   |
| 15           | Pulmonata                          | 65                                          | 63           | 89     | 75                | 94     | 75   | 80   | 5                    | 83   | 88   | 5                    | 71   | 77   | 6                    |
| 16           | Scorpiones                         | 100                                         | 100          | 100    | 100               | 100    | 100  | 100  | 0                    | 100  | 100  | 0                    | 100  | 100  | 0                    |
| 17           | Tetrapulmonata                     | 99                                          | 97           | 99     | 97                | 97     | 97   | 99   | 2                    | 98   | 100  | 2                    | 98   | 99   | 1                    |
| 18           | Pedipalpi                          | 100                                         | 100          | 100    | 85                | 100    | 94   | 95   | 1                    | 97   | 95   | -2                   | 98   | 96   | -2                   |
| 19           | Uropygi                            | 100                                         | 100          | 100    | 98                | 100    | 100  | 100  | 0                    | 99   | 100  | 1                    | 99   | 100  | 1                    |
| 20           | Mandibulata                        | 99                                          | 98           | 99     | 99                | 99     | 97   | 98   | 1                    | 99   | 99   | 0                    | 99   | 99   | 0                    |
| 21           | Myriapoda                          | 100                                         | 100          | 100    | 100               | 100    | 100  | 100  | 0                    | 100  | 100  | 0                    | 100  | 100  | 0                    |
| 22           | Chilopoda                          | 100                                         | 100          | 100    | 100               | 100    | 100  | 100  | 0                    | 100  | 100  | 0                    | 100  | 100  | 0                    |
| 23           | Pleurostigmophora                  | 93                                          | 97           | 78     | 59                | 77     | 91   | 88   | -3                   | 89   | 84   | -5                   | 92   | 82   | -10                  |
| 24           | Scolopendromorpha + Lithobiomorpha | 99                                          | 99           | 95     | 99                | 100    | 99   | 99   | 0                    | 99   | 99   | 0                    | 97   | 99   | 2                    |
| 27           | Diplopoda                          | 99                                          | 99           | 100    | 95                | 97     | 98   | 96   | -2                   | 98   | 97   | 0                    | 96   | 98   | 1                    |
| 28           | Chilognatha                        | 100                                         | 100          | 100    | 100               | 100    | 100  | 100  | 0                    | 100  | 100  | 0                    | 100  | 100  | 0                    |
| 32           | Edafopoda (=Symphyla + Pauropoda)  | 92                                          | 57           | 88     | 92                | 97     | 59   | 80   | 21                   | 70   | 87   | 17                   | 64   | 89   | 25                   |
| 33           | Symphyla                           | 100                                         | 100          | 100    | 100               | 100    | 100  | 100  | 0                    | 100  | 100  | 0                    | 100  | 100  | 0                    |
| 34           | Pancrustacea                       | 100                                         | 100          | 100    | 99                | 100    | 100  | 100  | 0                    | 100  | 100  | 0                    | 100  | 100  | 0                    |
| 35           | Oligostraca                        | 100                                         | 99           | 99     | 95                | 92     | 99   | 100  | 0                    | 93   | 99   | 5                    | 98   | 100  | 2                    |
| 37           | Myodocopa                          | 100                                         | 100          | 100    | 100               | 100    | 100  | 100  | 0                    | 100  | 100  | 0                    | 100  | 100  | 0                    |
| 39           | Ichthyostraca                      | 100                                         | 100          | 100    | 100               | 100    | 100  | 100  | 0                    | 100  | 100  | 0                    | 100  | 100  | 0                    |
| 40           | Altocrustacea                      | 93                                          | 25           | 90     | 89                | 81     | 16   | 58   | 41                   | 6    | 52   | 46                   | 20   | 66   | 46                   |
| 41           | Vericrustacea                      | 86                                          | 25           | 84     | 88                | 80     | 13   | 40   | 27                   | 15   | 54   | 39                   | 24   | 64   | 40                   |
| 42           | Branchiopoda                       | 100                                         | 100          | 100    | 100               | 100    | 100  | 100  | 0                    | 100  | 100  | 0                    | 100  | 100  | 0                    |
| 43           | Anostraca                          | 100                                         | 100          | 100    | 100               | 100    | 100  | 100  | 0                    | 100  | 100  | 0                    | 100  | 100  | 0                    |
| 44           | Phyllopoda                         | 100                                         | 100          | 100    | 100               | 100    | 100  | 100  | 0                    | 100  | 100  | 0                    | 100  | 100  | 0                    |
| 45           | Diplostraca                        | 100                                         | 100          | 100    | 100               | 100    | 100  | 100  | 0                    | 99   | 99   | 0                    | 100  | 100  | 0                    |
| 46           | Cladocera + Spinicaudata           | 100                                         | 100          | 100    | 100               | 100    | 100  | 100  | 0                    | 100  | 100  | 0                    | 100  | 100  | 0                    |
| 47           | Multicrustacea                     | 100                                         | 84           | 100    | 100               | 98     | 37   | 74   | 37                   | 43   | 86   | 43                   | 52   | 90   | 38                   |
| 48           | Copepoda                           | 100                                         | 100          | 100    | 100               | 100    | 100  | 100  | 0                    | 100  | 100  | 0                    | 100  | 100  | 0                    |
| 49           | Cyclopoida                         | 100                                         | 100          | 100    | 100               | 100    | 100  | 100  | 0                    | 100  | 100  | 0                    | 100  | 100  | 0                    |
| 50           | Communostraca                      | 84                                          | 99           | 78     | 57                | 86     | 100  | 99   | -1                   | 97   | 93   | -4                   | 99   | 95   | -3                   |
| 51           | Malacostraca                       | 100                                         | 100          | 100    | 100               | 100    | 100  | 100  | 0                    | 100  | 100  | 0                    | 100  | 100  | 0                    |
| 52           | Eumalacostraca                     | 100                                         | 100          | 100    | 100               | 100    | 100  | 100  | 0                    | 100  | 100  | 0                    | 100  | 100  | 0                    |
| 53           | Eucarida + Peracarida              | 87                                          | 84           | 68     | 51                | 58     | 90   | 92   | 2                    | 81   | 84   | 3                    | 87   | 89   | 2                    |
| 54           | Thecostraca                        | 100                                         | 100          | 100    | 100               | 100    | 100  | 100  | 0                    | 100  | 100  | 0                    | 100  | 100  | 0                    |
| 55           | Thoracica                          | 100                                         | 100          | 100    | 100               | 100    | 100  | 100  | 0                    | 100  | 100  | 0                    | 100  | 100  | 0                    |
| 56           | Sessilia                           | 97                                          | 83           | 94     | 99                | 97     | 94   | 98   | 3                    | 96   | 98   | 1                    | 97   | 97   | 0                    |
| 57           | Miracrustacea                      | 94                                          | 25           | 92     | 98                | 79     | 10   | 45   | 35                   | 8    | 42   | 34                   | 16   | 66   | 50                   |
| 58           | Xenocarida                         | 93                                          | 57           | 90     | 100               | 89     | 39   | 70   | 31                   | 27   | 64   | 36                   | 55   | 87   | 32                   |
| 59           | Hexapoda                           | 100                                         | 100          | 99     | 99                | 97     | 100  | 100  | 0                    | 99   | 100  | 1                    | 100  | 100  | 0                    |
| 60           | Entognatha                         | 86                                          | 51           | 80     | 89                | 89     | 88   | 86   | -2                   | 96   | 97   | 0                    | 85   | 91   | 6                    |
| 61           | Diplura                            | 100                                         | 100          | 100    | 100               | 100    | 100  | 100  | 0                    | 100  | 100  | 0                    | 100  | 100  | 0                    |
| 62           | Collembola                         | 100                                         | 100          | 100    | 100               | 100    | 100  | 100  | 0                    | 100  | 100  | 0                    | 100  | 100  | 0                    |
| 63           | Entomobryomorpha                   | 98                                          | 87           | 99     | 95                | 79     | 96   | 98   | 2                    | 98   | 98   | 0                    | 97   | 96   | -1                   |
| 64           | Insecta                            | 100                                         | 100          | 100    | 100               | 100    | 100  | 100  | 0                    | 100  | 100  | 0                    | 100  | 100  | 0                    |
| 65           | Archaeognatha                      | 100                                         | 100          | 100    | 100               | 100    | 100  | 100  | 0                    | 100  | 100  | 0                    | 100  | 100  | 0                    |
| 66           | Dicondylia                         | 100                                         | 100          | 100    | 99                | 100    | 100  | 100  | 0                    | 100  | 100  | 0                    | 100  | 100  | 0                    |
| 67           | Zygentoma                          | 100                                         | 100          | 100    | 100               | 100    | 100  | 100  | 0                    | 100  | 100  | 0                    | 100  | 100  | 0                    |
| 68           | Pterygota                          | 99                                          | 93           | 99     | 99                | 92     | 100  | 100  | 0                    | 100  | 99   | -1                   | 100  | 99   | 0                    |
| 69           | Paleoptera                         | 69                                          | 84           | 76     | 59                | 76     | 91   | 89   | -1                   | 93   | 95   | 2                    | 88   | 90   | 2                    |
| 70           | Ephemeroptera                      | 100                                         | 100          | 100    | 100               | 100    | 100  | 100  | 0                    | 100  | 100  | 0                    | 100  | 100  | 0                    |
| 71           | Odonata                            | 100                                         | 100          | 100    | 100               | 100    | 100  | 100  | 0                    | 100  | 100  | 0                    | 100  | 100  | 0                    |
| 72           | Neoptera                           | 97                                          | 98           | 97     | 96                | 81     | 93   | 94   | 1                    | 96   | 97   | 1                    | 96   | 98   | 2                    |
| 73           | Polyneoptera                       | 99                                          | 100          | 100    | 94                | 97     | 100  | 99   | -1                   | 100  | 97   | -3                   | 100  | 99   | -1                   |
| 74           | Blattodea + Orthoptera             | 94                                          | 93           | 95     | 99                | 89     | 93   | 97   | 3                    | 95   | 99   | 4                    | 95   | 98   | 3                    |
| 75           | Lepidoptera                        | 100                                         | 100          | 100    | 100               | 100    | 100  | 100  | 0                    | 100  | 100  | 0                    | 100  | 100  | 0                    |
| 76           | Diitryia                           | 100                                         | 100          | 100    | 100               | 100    | 100  | 100  | 0                    | 100  | 100  | 0                    | 100  | 100  | 0                    |
