# Supplementary material for: Resolving Discrepancy between Nucleotides and Amino Acids in Deep-Level Arthropod Phylogenomics: Differentiating Serine Codons in 21-Amino-Acid Models
Source: PubMed Central journal article supplement (PMC3502419; doi:10.1371/journal.pone.0047450), 2012-11-20
Supplement: pone.0047450.s009.pdf [file pone.0047450.s009.pdf]

**Table S2.** Amino acid rate matrices for 20/21AA-JTT and 20/21AA-ECM as implemented in GARLI V2.0

**21AA-ECM rate matrix (in the 20AA matrix, S rates are the sum of 21AA-ECM S and Z rates)**

|   | A | C        | D        | E        | F        | G         | H        | I        | K        | L         | M         | N        | P        |
|---|---|----------|----------|----------|----------|-----------|----------|----------|----------|-----------|-----------|----------|----------|
| A |   | 5.144764 | 2.195588 | 4.229953 | 1.203338 | 10.943117 | 1.431657 | 2.066347 | 2.551994 | 5.777557  | 1.975596  | 1.408829 | 8.236222 |
| C |   |          | 0.171732 | 0.060174 | 1.418070 | 1.331899  | 1.118779 | 0.823508 | 0.150118 | 2.851527  | 0.622704  | 0.686527 | 0.473549 |
| D |   |          |          | 7.918377 | 0.119763 | 3.011624  | 1.870186 | 0.100626 | 1.272808 | 0.382254  | 0.070444  | 6.797966 | 2.466156 |
| E |   |          |          |          | 0.136811 | 2.187637  | 1.283762 | 0.444563 | 4.290266 | 0.999391  | 0.296459  | 1.691423 | 2.506945 |
| F |   |          |          |          |          | 0.520807  | 1.402246 | 3.381605 | 0.210995 | 11.691042 | 1.479972  | 0.407368 | 0.725283 |
| G |   |          |          |          |          |           | 1.196159 | 0.320999 | 1.710345 | 1.192392  | 0.494005  | 4.119096 | 2.723789 |
| H |   |          |          |          |          |           |          | 0.362077 | 1.938735 | 2.340967  | 0.486994  | 5.544322 | 2.452656 |
| I |   |          |          |          |          |           |          |          | 1.126065 | 27.775065 | 4.814082  | 0.731755 | 1.070870 |
| K |   |          |          |          |          |           |          |          |          | 1.643642  | 0.772948  | 4.052440 | 2.400410 |
| L |   |          |          |          |          |           |          |          |          |           | 11.007710 | 0.929799 | 4.139546 |
| M |   |          |          |          |          |           |          |          |          |           |           | 0.428094 | 0.325551 |
| N |   |          |          |          |          |           |          |          |          |           |           |          | 1.588971 |
| P |   |          |          |          |          |           |          |          |          |           |           |          |          |
| Q |   |          |          |          |          |           |          |          |          |           |           |          |          |
| R |   |          |          |          |          |           |          |          |          |           |           |          |          |
| S |   |          |          |          |          |           |          |          |          |           |           |          |          |
| T |   |          |          |          |          |           |          |          |          |           |           |          |          |
| V |   |          |          |          |          |           |          |          |          |           |           |          |          |
| W |   |          |          |          |          |           |          |          |          |           |           |          |          |
| Y |   |          |          |          |          |           |          |          |          |           |           |          |          |
| Z |   |          |          |          |          |           |          |          |          |           |           |          |          |

|   | Q        | R         | S         | T         | V         | W        | Y        | Z         | RESCALE FACTORS |          | AVERAGE (excl. Z/S):     |           |
|---|----------|-----------|-----------|-----------|-----------|----------|----------|-----------|-----------------|----------|--------------------------|-----------|
|   |          |           |           |           |           |          |          |           | S'              | Z        | Absolute Z/S:            | 3.641275  |
|   |          |           |           |           |           |          |          |           |                 |          | Z/S relative to average: | 40.754475 |
|   |          |           |           |           |           |          |          |           |                 |          |                          | 11.192365 |
| A | 3.789726 | 6.454848  | 26.021204 | 12.810670 | 14.884027 | 0.557519 | 1.096362 | 4.939981  | 0.840446        | 0.159554 |                          |           |
| C | 0.358913 | 2.308456  | 5.127768  | 2.602089  | 4.376476  | 0.474671 | 1.574639 | 3.810018  | 0.573718        | 0.426282 |                          |           |
| D | 1.887363 | 1.302153  | 3.291162  | 2.177254  | 0.421621  | 0.094633 | 0.433956 | 3.721020  | 0.469349        | 0.530651 |                          |           |
| E | 6.998262 | 5.080131  | 3.039828  | 3.371424  | 1.553576  | 0.147600 | 0.480090 | 2.092705  | 0.592267        | 0.407733 |                          |           |
| F | 0.259926 | 0.712359  | 2.079796  | 1.004076  | 2.955317  | 1.970208 | 9.785921 | 0.392400  | 0.841275        | 0.158725 |                          |           |
| G | 1.587673 | 5.688727  | 6.142395  | 2.094325  | 1.413316  | 0.599971 | 0.392917 | 8.467722  | 0.420421        | 0.579579 |                          |           |
| H | 6.834790 | 10.538877 | 2.732229  | 2.153889  | 0.928450  | 0.564346 | 6.888784 | 2.581263  | 0.514206        | 0.485794 |                          |           |
| I | 0.589348 | 1.823729  | 0.693063  | 5.974187  | 37.318690 | 0.385202 | 1.207469 | 0.938984  | 0.424659        | 0.575341 |                          |           |
| K | 6.247636 | 28.489097 | 3.040150  | 5.005667  | 1.352499  | 0.156231 | 0.723809 | 2.945964  | 0.507867        | 0.492133 |                          |           |
| L | 3.985715 | 6.692981  | 4.582890  | 4.988749  | 17.725189 | 1.549814 | 2.797498 | 0.679785  | 0.870829        | 0.129171 |                          |           |
| M | 1.278593 | 1.694322  | 0.908872  | 3.084096  | 2.749346  | 0.321642 | 0.594722 | 0.610956  | 0.598010        | 0.401990 |                          |           |
| N | 3.329175 | 3.906960  | 4.722081  | 6.317646  | 0.559798  | 0.128767 | 1.325032 | 10.329447 | 0.313728        | 0.686272 |                          |           |
| P | 3.162432 | 6.287485  | 13.191683 | 5.919012  | 2.849121  | 0.380493 | 0.748452 | 2.506169  | 0.840350        | 0.159650 |                          |           |
| Q |          | 16.439866 | 4.651786  | 4.519492  | 1.319533  | 0.302653 | 0.989983 | 2.912063  | 0.615002        | 0.384998 |                          |           |
| R |          |           | 5.622100  | 8.803644  | 2.922289  | 2.120534 | 2.276895 | 9.583104  | 0.369748        | 0.630252 |                          |           |
| S |          |           |           | 30.098825 | 2.234643  | 0.756949 | 2.013691 | 40.754475 |                 |          |                          |           |
| T |          |           |           |           | 12.929044 | 0.496863 | 1.475472 | 16.815460 | 0.641571        | 0.358429 |                          |           |
| V |          |           |           |           |           | 0.466495 | 1.577329 | 0.895539  | 0.713902        | 0.286098 |                          |           |
| W |          |           |           |           |           |          | 2.562047 | 0.306184  | 0.711998        | 0.288002 |                          |           |
| Y |          |           |           |           |           |          |          | 0.853656  | 0.702284        | 0.297716 |                          |           |
| Z |          |           |           |           |           |          |          |           |                 |          |                          |           |

The above relative rates are the sum of all individual ECM rates (Kosiol *et al.* 2007) of codons that encode for the same amino acid (with S (*Ser1*) and Z (*Ser2*) for the 21AA-ECM). Rescale factors and averages see below (21AA-JTT).

20AA-JTT relative rate matrix as implemented in GARLI V2.0

|   | A | C     | D     | E     | F     | G     | H     | I     | K     | L     | M     | N     | P     |
|---|---|-------|-------|-------|-------|-------|-------|-------|-------|-------|-------|-------|-------|
| A |   | 0.056 | 0.081 | 0.105 | 0.015 | 0.179 | 0.027 | 0.036 | 0.035 | 0.030 | 0.054 | 0.054 | 0.194 |
| C |   |       | 0.010 | 0.005 | 0.078 | 0.059 | 0.069 | 0.017 | 0.007 | 0.023 | 0.031 | 0.034 | 0.014 |
| D |   |       |       | 0.767 | 0.004 | 0.130 | 0.112 | 0.011 | 0.026 | 0.007 | 0.015 | 0.528 | 0.015 |
| E |   |       |       |       | 0.005 | 0.119 | 0.026 | 0.012 | 0.181 | 0.009 | 0.018 | 0.058 | 0.018 |
| F |   |       |       |       |       | 0.005 | 0.040 | 0.089 | 0.004 | 0.248 | 0.043 | 0.010 | 0.017 |
| G |   |       |       |       |       |       | 0.023 | 0.006 | 0.027 | 0.006 | 0.014 | 0.081 | 0.024 |
| H |   |       |       |       |       |       |       | 0.016 | 0.045 | 0.056 | 0.033 | 0.391 | 0.115 |
| I |   |       |       |       |       |       |       |       | 0.021 | 0.229 | 0.479 | 0.047 | 0.010 |
| K |   |       |       |       |       |       |       |       |       | 0.014 | 0.065 | 0.263 | 0.021 |
| L |   |       |       |       |       |       |       |       |       |       | 0.388 | 0.012 | 0.102 |
| M |   |       |       |       |       |       |       |       |       |       |       | 0.030 | 0.016 |
| N |   |       |       |       |       |       |       |       |       |       |       |       | 0.015 |
| P |   |       |       |       |       |       |       |       |       |       |       |       |       |
| Q |   |       |       |       |       |       |       |       |       |       |       |       |       |
| R |   |       |       |       |       |       |       |       |       |       |       |       |       |
| S |   |       |       |       |       |       |       |       |       |       |       |       |       |
| T |   |       |       |       |       |       |       |       |       |       |       |       |       |
| V |   |       |       |       |       |       |       |       |       |       |       |       |       |
| W |   |       |       |       |       |       |       |       |       |       |       |       |       |
| Y |   |       |       |       |       |       |       |       |       |       |       |       |       |
| Z |   |       |       |       |       |       |       |       |       |       |       |       |       |

|   | Q     | R     | S     | T     | V     | W     | Y     |
|---|-------|-------|-------|-------|-------|-------|-------|
| A | 0.057 | 0.058 | 0.378 | 0.475 | 0.298 | 0.009 | 0.011 |
| C | 0.009 | 0.113 | 0.223 | 0.042 | 0.062 | 0.115 | 0.209 |
| D | 0.049 | 0.016 | 0.059 | 0.038 | 0.031 | 0.004 | 0.046 |
| E | 0.323 | 0.029 | 0.030 | 0.032 | 0.045 | 0.010 | 0.007 |
| F | 0.004 | 0.005 | 0.092 | 0.012 | 0.062 | 0.053 | 0.536 |
| G | 0.026 | 0.137 | 0.201 | 0.033 | 0.047 | 0.055 | 0.008 |
| H | 0.597 | 0.328 | 0.073 | 0.046 | 0.011 | 0.008 | 0.573 |
| I | 0.009 | 0.022 | 0.040 | 0.245 | 0.961 | 0.009 | 0.032 |
| K | 0.292 | 0.646 | 0.047 | 0.103 | 0.014 | 0.010 | 0.008 |
| L | 0.072 | 0.038 | 0.059 | 0.025 | 0.180 | 0.052 | 0.024 |
| M | 0.043 | 0.044 | 0.029 | 0.226 | 0.323 | 0.024 | 0.018 |
| N | 0.086 | 0.045 | 0.503 | 0.232 | 0.016 | 0.008 | 0.070 |
| P | 0.164 | 0.074 | 0.285 | 0.118 | 0.023 | 0.006 | 0.010 |
| Q |       | 0.310 | 0.053 | 0.051 | 0.020 | 0.018 | 0.024 |
| R |       |       | 0.101 | 0.064 | 0.017 | 0.126 | 0.020 |
| S |       |       |       | 0.477 | 0.038 | 0.035 | 0.063 |
| T |       |       |       |       | 0.112 | 0.012 | 0.021 |
| V |       |       |       |       |       | 0.025 | 0.016 |
| W |       |       |       |       |       |       | 0.071 |
| Y |       |       |       |       |       |       |       |
| Z |       |       |       |       |       |       |       |

**21AA-JTT matrix based on the above 20AA-JTT matrix, modified by ECM derived rescale factors with relative S rates multiplied by S' factors, and relative Z rates being relative S rates multiplied by Z factors; S/Z rate is relative to the average rate of all other amino acids**

|   | A | C     | D     | E     | F     | G     | H     | I     | K     | L     | M     | N     | P     |
|---|---|-------|-------|-------|-------|-------|-------|-------|-------|-------|-------|-------|-------|
| A |   | 0.056 | 0.081 | 0.105 | 0.015 | 0.179 | 0.027 | 0.036 | 0.035 | 0.030 | 0.054 | 0.054 | 0.194 |
| C |   |       | 0.010 | 0.005 | 0.078 | 0.059 | 0.069 | 0.017 | 0.007 | 0.023 | 0.031 | 0.034 | 0.014 |
| D |   |       |       | 0.767 | 0.004 | 0.130 | 0.112 | 0.011 | 0.026 | 0.007 | 0.015 | 0.528 | 0.015 |
| E |   |       |       |       | 0.005 | 0.119 | 0.026 | 0.012 | 0.181 | 0.009 | 0.018 | 0.058 | 0.018 |
| F |   |       |       |       |       | 0.005 | 0.040 | 0.089 | 0.004 | 0.248 | 0.043 | 0.010 | 0.017 |
| G |   |       |       |       |       |       | 0.023 | 0.006 | 0.027 | 0.006 | 0.014 | 0.081 | 0.024 |
| H |   |       |       |       |       |       |       | 0.016 | 0.045 | 0.056 | 0.033 | 0.391 | 0.115 |
| I |   |       |       |       |       |       |       |       | 0.021 | 0.229 | 0.479 | 0.047 | 0.010 |
| K |   |       |       |       |       |       |       |       |       | 0.014 | 0.065 | 0.263 | 0.021 |
| L |   |       |       |       |       |       |       |       |       |       | 0.388 | 0.012 | 0.102 |
| M |   |       |       |       |       |       |       |       |       |       |       | 0.030 | 0.016 |
| N |   |       |       |       |       |       |       |       |       |       |       |       | 0.015 |
| P |   |       |       |       |       |       |       |       |       |       |       |       |       |

|   | Q     | R     | S     | T     | V     | W     | Y     | Z     | AVERAGE (excl. Z/S):                | 0.091 |
|---|-------|-------|-------|-------|-------|-------|-------|-------|-------------------------------------|-------|
| A | 0.057 | 0.058 | 0.318 | 0.475 | 0.298 | 0.009 | 0.011 | 0.060 | Z/S (= average * relative ECM Z/S): | 1.022 |
| C | 0.009 | 0.113 | 0.128 | 0.042 | 0.062 | 0.115 | 0.209 | 0.095 |                                     |       |
| D | 0.049 | 0.016 | 0.028 | 0.038 | 0.031 | 0.004 | 0.046 | 0.031 |                                     |       |
| E | 0.323 | 0.029 | 0.018 | 0.032 | 0.045 | 0.010 | 0.007 | 0.012 |                                     |       |
| F | 0.004 | 0.005 | 0.077 | 0.012 | 0.062 | 0.053 | 0.536 | 0.015 |                                     |       |
| G | 0.026 | 0.137 | 0.085 | 0.033 | 0.047 | 0.055 | 0.008 | 0.116 |                                     |       |
| H | 0.597 | 0.328 | 0.038 | 0.046 | 0.011 | 0.008 | 0.573 | 0.035 |                                     |       |
| I | 0.009 | 0.022 | 0.017 | 0.245 | 0.961 | 0.009 | 0.032 | 0.023 |                                     |       |
| K | 0.292 | 0.646 | 0.024 | 0.103 | 0.014 | 0.010 | 0.008 | 0.023 |                                     |       |
| L | 0.072 | 0.038 | 0.051 | 0.025 | 0.180 | 0.052 | 0.024 | 0.008 |                                     |       |
| M | 0.043 | 0.044 | 0.017 | 0.226 | 0.323 | 0.024 | 0.018 | 0.012 |                                     |       |
| N | 0.086 | 0.045 | 0.158 | 0.232 | 0.016 | 0.008 | 0.070 | 0.345 |                                     |       |
| P | 0.164 | 0.074 | 0.239 | 0.118 | 0.023 | 0.006 | 0.010 | 0.046 |                                     |       |
| Q |       | 0.310 | 0.033 | 0.051 | 0.020 | 0.018 | 0.024 | 0.020 |                                     |       |
| R |       |       | 0.037 | 0.064 | 0.017 | 0.126 | 0.020 | 0.064 |                                     |       |
| S |       |       |       | 0.477 | 0.038 | 0.035 | 0.063 | 1.022 |                                     |       |
| T |       |       |       |       | 0.112 | 0.012 | 0.021 | 0.171 |                                     |       |
| V |       |       |       |       |       | 0.025 | 0.016 | 0.011 |                                     |       |
| W |       |       |       |       |       |       | 0.071 | 0.010 |                                     |       |
| Y |       |       |       |       |       |       |       | 0.019 |                                     |       |
| Z |       |       |       |       |       |       |       |       |                                     |       |

Rates for S and Z were estimated by applying the proportions of S and Z in the above 21AA-ECM rate matrix. Rates between the two serine codon groups and other amino acids were determined by splitting the original JTT rates for serine proportionally to the 21AA-ECM rates for S and Z relative to the total serine rate ("Rescale factors"). For example, in the case of alanine (A), the 21AA-ECM rate for S to A is 26.02 and for Z to A 4.94. Hence, the proportion of S and Z for a total serine rate is 0.84 and 0.16, respectively. In the 20AA-JTT model implemented in GARLI, the serine to alanine rate is 0.38, hence, multiplying this rate with the S and Z proportions results in rates of 0.32 and 0.06 for 21AA-JTT S and Z, respectively. This approach can't be used to determine the rate between S and Z, as it would be a rate relative to itself (the synonymous substitution rate of serine). Hence, this factor was estimated by obtaining a rate between S to Z relative to the average of all other rates in the 21AA-ECM matrix. Multiplying the average rate of the 20AA-JTT matrix with this factor provides the S to Z rate in the 21AA-JTT matrix. In the 21AA-ECM matrix, the absolute S to Z rate is 40.75 and the average of all other rates 3.64, resulting in a S to Z rate of 11.19 relative to the average. The average rate in the 20AA-JTT model implemented in GARLI is 0.09, which results in an absolute rate of 1.02 for the 21AA-JTT S to Z rate when applying the relative factor of 11.19.
