# Supplementary material for: Resolving Discrepancy between Nucleotides and Amino Acids in Deep-Level Arthropod Phylogenomics: Differentiating Serine Codons in 21-Amino-Acid Models
Source: PubMed Central journal article supplement (PMC3502419; doi:10.1371/journal.pone.0047450), 2012-11-20
Supplement: pone.0047450.s012.pdf [file pone.0047450.s012.pdf]

**Table S5: Number of SER-containing alignment sites in relation to the number of taxa that encode SER at those sites.** Both non-co-SER sites (encoding exclusively S or Z) and co-SER sites (encoding S and Z) have numbers of taxa that encode S and/or Z, respectively, ranging from 2 to 80. The existence of non-co-SER sites with many taxa indicates that S and Z are not entirely freely interchangeable, i.e., that the different codon groups *Ser1* and *Ser2* are not truly synonymous. There is a total of 1,642 non-co- and 1,531 co-SER sites in the alignment, with about half of those non-co-SER sites (819) comprising only a single taxon that encodes S or Z.

| # of taxa | non-co-SER | co-SER | # of taxa | non-co-SER | co-SER |
|-----------|------------|--------|-----------|------------|--------|
| 1         | 819        | n/a    | 41        | 1          | 7      |
| 2         | 310        | 144    | 42        | 0          | 3      |
| 3         | 137        | 132    | 43        | 0          | 3      |
| 4         | 78         | 99     | 44        | 0          | 9      |
| 5         | 65         | 101    | 45        | 1          | 9      |
| 6         | 25         | 63     | 46        | 2          | 8      |
| 7         | 17         | 63     | 47        | 1          | 11     |
| 8         | 19         | 48     | 48        | 0          | 8      |
| 9         | 12         | 45     | 49        | 2          | 9      |
| 10        | 12         | 37     | 50        | 4          | 8      |
| 11        | 10         | 37     | 51        | 3          | 15     |
| 12        | 12         | 22     | 52        | 0          | 9      |
| 13        | 8          | 24     | 53        | 1          | 10     |
| 14        | 4          | 22     | 54        | 1          | 17     |
| 15        | 4          | 14     | 55        | 2          | 5      |
| 16        | 0          | 23     | 56        | 4          | 11     |
| 17        | 1          | 10     | 57        | 5          | 11     |
| 18        | 3          | 12     | 58        | 8          | 16     |
| 19        | 4          | 12     | 59        | 1          | 16     |
| 20        | 2          | 12     | 60        | 0          | 12     |
| 21        | 0          | 18     | 61        | 0          | 13     |
| 22        | 0          | 16     | 62        | 3          | 9      |
| 23        | 0          | 13     | 63        | 0          | 23     |
| 24        | 1          | 5      | 64        | 3          | 13     |
| 25        | 0          | 14     | 65        | 2          | 20     |
| 26        | 0          | 10     | 66        | 1          | 18     |
| 27        | 0          | 7      | 67        | 0          | 24     |
| 28        | 0          | 9      | 68        | 5          | 12     |
| 29        | 2          | 6      | 69        | 9          | 17     |
| 30        | 1          | 6      | 70        | 3          | 8      |
| 31        | 2          | 14     | 71        | 2          | 10     |
| 32        | 1          | 5      | 72        | 4          | 21     |
| 33        | 1          | 6      | 73        | 2          | 12     |
| 34        | 2          | 6      | 74        | 4          | 15     |
| 35        | 1          | 6      | 75        | 3          | 14     |
| 36        | 4          | 5      | 76        | 3          | 6      |
| 37        | 1          | 3      | 77        | 0          | 2      |
| 38        | 0          | 9      | 78        | 0          | 2      |
| 39        | 0          | 4      | 79        | 1          | 1      |
| 40        | 1          | 9      | 80        | 2          | 3      |
