# Supplementary material for: Resolving Discrepancy between Nucleotides and Amino Acids in Deep-Level Arthropod Phylogenomics: Differentiating Serine Codons in 21-Amino-Acid Models
Source: PLoS One. 2012 Nov 20;7(11):e47450. doi: 10.1371/journal.pone.0047450 (PMC3502419; doi:10.1371/journal.pone.0047450)
Supplement: Table S3 — Effect of data set manipulations on bootstrap percentages of 68 taxonomic groups. Changes in bootstrap proportions are relative to the standard degen1 and 20AA-JTT values (Table S1). (PDF) [file pone.0047450.s010.pdf]

**Table S3.** Effect of data set manipulations on bootstrap percentages of all taxonomic groups. Changes in bootstrap proportions are relative to the standard degen1 and 20AA-JTT values (Supplementary Table 1).

| node index # | taxonomic group                    | no Ser1, no Ser2 |                                 |      |                                 | no co-Ser1, no co-Ser2 |                                       |      |                                       | no co-Ser1 |                           |      |                           | no co-Ser2 |                           |      |                           |
|--------------|------------------------------------|------------------|---------------------------------|------|---------------------------------|------------------------|---------------------------------------|------|---------------------------------------|------------|---------------------------|------|---------------------------|------------|---------------------------|------|---------------------------|
|              |                                    | degen 1          | Δ (no Ser1, no Ser2 - standard) | 20AA | Δ (no Ser1, no Ser2 - standard) | degen 1                | Δ (no co-Ser1, no co-Ser2 - standard) | 20AA | Δ (no co-Ser1, no co-Ser2 - standard) | degen 1    | Δ (no co-Ser1 - standard) | 20AA | Δ (no co-Ser1 - standard) | degen 1    | Δ (no co-Ser2 - standard) | 20AA | Δ (no co-Ser2 - standard) |
| 32           | Edafopoda (=Symphyla + Pauropoda)  | 59               | -33                             | 66   | 2                               | 52                     | -40                                   | 73   | 9                                     | 60         | -32                       | 68   | 4                         | 59         | -33                       | 71   | 7                         |
| 40           | Altocrustacea                      | 32               | -61                             | 7    | -13                             | 51                     | -42                                   | 8    | -12                                   | 55         | -38                       | 8    | -12                       | 52         | -41                       | 13   | -7                        |
| 41           | Vericrustacea                      | 26               | -60                             | 13   | -11                             | 47                     | -39                                   | 11   | -13                                   | 41         | -45                       | 8    | -16                       | 53         | -33                       | 16   | -7                        |
| 47           | Multicrustacea                     | 53               | -47                             | 29   | -23                             | 75                     | -25                                   | 34   | -18                                   | 75         | -25                       | 40   | -12                       | 92         | -8                        | 47   | -5                        |
| 57           | Miracrustacea                      | 27               | -67                             | 13   | -3                              | 38                     | -56                                   | 20   | 4                                     | 42         | -52                       | 15   | -1                        | 33         | -61                       | 4    | -12                       |
| 58           | Xenocarida                         | 52               | -41                             | 44   | -11                             | 68                     | -25                                   | 60   | 5                                     | 69         | -24                       | 73   | 18                        | 61         | -32                       | 55   | 0                         |
| 1            | Onychophora                        | 100              | 0                               | 100  | 0                               | 100                    | 0                                     | 100  | 0                                     | 100        | 0                         | 100  | 0                         | 100        | 0                         | 100  | 0                         |
| 2            | Peripatopsidae                     | 100              | 0                               | 100  | 0                               | 100                    | 0                                     | 100  | 0                                     | 100        | 0                         | 100  | 0                         | 100        | 0                         | 100  | 0                         |
| 3            | Tardigrada                         | 100              | 0                               | 100  | 0                               | 100                    | 0                                     | 100  | 0                                     | 100        | 0                         | 100  | 0                         | 100        | 0                         | 100  | 0                         |
| 4            | Arthropoda                         | 100              | 0                               | 100  | 0                               | 100                    | 0                                     | 100  | 0                                     | 100        | 0                         | 100  | 0                         | 100        | 0                         | 100  | 0                         |
| 5            | Pycnogonida                        | 100              | 0                               | 100  | 0                               | 100                    | 0                                     | 100  | 0                                     | 100        | 0                         | 100  | 0                         | 100        | 0                         | 100  | 0                         |
| 6            | Ammotheidae + Endeididae           | 86               | -7                              | 91   | -1                              | 90                     | -3                                    | 95   | 3                                     | 92         | -1                        | 96   | 3                         | 91         | -2                        | 93   | 0                         |
| 8            | Ammotheidae                        | 96               | -3                              | 87   | -2                              | 93                     | -6                                    | 83   | -6                                    | 98         | -1                        | 92   | 3                         | 98         | -1                        | 86   | -3                        |
| 9            | Tanystylum + Achelia               | 93               | -5                              | 94   | -3                              | 90                     | -8                                    | 95   | -2                                    | 93         | -5                        | 97   | 1                         | 96         | -2                        | 97   | 0                         |
| 12           | Euchelicerata                      | 100              | 0                               | 100  | 0                               | 100                    | 0                                     | 100  | 0                                     | 100        | 0                         | 100  | 0                         | 100        | 0                         | 100  | 0                         |
| 13           | Xiphosura                          | 100              | 0                               | 100  | 0                               | 100                    | 0                                     | 100  | 0                                     | 100        | 0                         | 100  | 0                         | 100        | 0                         | 100  | 0                         |
| 14           | Arachnida                          | 74               | 6                               | 42   | 25                              | 62                     | -6                                    | 33   | 16                                    | 60         | -8                        | 25   | 8                         | 68         | 0                         | 31   | 14                        |
| 15           | Pulmonata                          | 33               | -32                             | 57   | -15                             | 42                     | -23                                   | 76   | 5                                     | 53         | -12                       | 74   | 3                         | 62         | -3                        | 78   | 7                         |
| 16           | Scorpiones                         | 100              | 0                               | 100  | 0                               | 100                    | 0                                     | 100  | 0                                     | 100        | 0                         | 100  | 0                         | 100        | 0                         | 100  | 0                         |
| 17           | Tetrapulmonata                     | 97               | -2                              | 96   | -1                              | 100                    | 1                                     | 99   | 2                                     | 99         | 0                         | 99   | 2                         | 99         | 0                         | 99   | 1                         |
| 18           | Pedipalpi                          | 100              | 0                               | 97   | -1                              | 100                    | 0                                     | 92   | -6                                    | 100        | 0                         | 95   | -3                        | 100        | 0                         | 98   | 0                         |
| 19           | Uropygi                            | 100              | 0                               | 99   | 0                               | 100                    | 0                                     | 100  | 0                                     | 99         | -1                        | 99   | 0                         | 100        | 0                         | 100  | 0                         |
| 20           | Mandibulata                        | 98               | -1                              | 97   | -1                              | 100                    | 1                                     | 98   | 0                                     | 100        | 1                         | 99   | 0                         | 100        | 1                         | 97   | -1                        |
| 21           | Myriapoda                          | 100              | 0                               | 100  | 0                               | 100                    | 0                                     | 100  | 0                                     | 100        | 0                         | 100  | 0                         | 100        | 0                         | 100  | 0                         |
| 22           | Chilopoda                          | 100              | 0                               | 100  | 0                               | 100                    | 0                                     | 100  | 0                                     | 100        | 0                         | 100  | 0                         | 100        | 0                         | 100  | 0                         |
| 23           | Pleurostigmophora                  | 97               | 4                               | 95   | 3                               | 98                     | 5                                     | 97   | 5                                     | 97         | 4                         | 94   | 2                         | 96         | 3                         | 96   | 4                         |
| 24           | Scolopendromorpha + Lithobiomorpha | 87               | -12                             | 63   | -34                             | 96                     | -3                                    | 86   | -11                                   | 99         | 0                         | 96   | -1                        | 98         | -1                        | 91   | -6                        |
| 27           | Diplopoda                          | 100              | 1                               | 95   | -1                              | 98                     | -1                                    | 94   | -3                                    | 99         | 0                         | 95   | -2                        | 99         | 0                         | 97   | 1                         |
| 28           | Chilognatha                        | 100              | 0                               | 100  | 0                               | 100                    | 0                                     | 100  | 0                                     | 100        | 0                         | 100  | 0                         | 100        | 0                         | 100  | 0                         |
| 32           | Edafopoda (=Symphyla + Pauropoda)  | 59               | -33                             | 66   | 2                               | 52                     | -40                                   | 73   | 9                                     | 60         | -32                       | 68   | 4                         | 59         | -33                       | 71   | 7                         |
| 33           | Symphyla                           | 100              | 0                               | 100  | 0                               | 100                    | 0                                     | 100  | 0                                     | 100        | 0                         | 100  | 0                         | 100        | 0                         | 100  | 0                         |
| 34           | Pancrustacea                       | 100              | 0                               | 100  | 0                               | 100                    | 0                                     | 100  | 0                                     | 100        | 0                         | 100  | 0                         | 100        | 0                         | 100  | 0                         |
| 35           | Oligostraca                        | 98               | -2                              | 95   | -3                              | 98                     | -2                                    | 98   | 0                                     | 99         | -1                        | 97   | -1                        | 99         | -1                        | 98   | 0                         |
| 37           | Myodocopa                          | 100              | 0                               | 100  | 0                               | 100                    | 0                                     | 100  | 0                                     | 100        | 0                         | 100  | 0                         | 100        | 0                         | 100  | 0                         |
| 39           | Ichthyostraca                      | 100              | 0                               | 100  | 0                               | 100                    | 0                                     | 100  | 0                                     | 100        | 0                         | 100  | 0                         | 100        | 0                         | 100  | 0                         |
| 40           | Altocrustacea                      | 32               | -61                             | 7    | -13                             | 51                     | -42                                   | 8    | -12                                   | 55         | -38                       | 8    | -12                       | 52         | -41                       | 13   | -7                        |
| 41           | Vericrustacea                      | 26               | -60                             | 13   | -11                             | 47                     | -39                                   | 11   | -13                                   | 41         | -45                       | 8    | -16                       | 53         | -33                       | 16   | -7                        |
| 42           | Branchiopoda                       | 100              | 0                               | 100  | 0                               | 100                    | 0                                     | 100  | 0                                     | 100        | 0                         | 100  | 0                         | 100        | 0                         | 100  | 0                         |
| 43           | Anostraca                          | 100              | 0                               | 100  | 0                               | 100                    | 0                                     | 100  | 0                                     | 100        | 0                         | 100  | 0                         | 100        | 0                         | 100  | 0                         |
| 44           | Phyllopoda                         | 100              | 0                               | 100  | 0                               | 100                    | 0                                     | 100  | 0                                     | 100        | 0                         | 100  | 0                         | 100        | 0                         | 100  | 0                         |
| 45           | Diplostraca                        | 100              | 0                               | 100  | 0                               | 100                    | 0                                     | 100  | 0                                     | 100        | 0                         | 100  | 0                         | 100        | 0                         | 100  | 0                         |
| 46           | Cladocera + Spinicaudata           | 100              | 0                               | 100  | 0                               | 100                    | 0                                     | 100  | 0                                     | 100        | 0                         | 100  | 0                         | 100        | 0                         | 100  | 0                         |
| 47           | Multicrustacea                     | 53               | -47                             | 29   | -23                             | 75                     | -25                                   | 34   | -18                                   | 75         | -25                       | 40   | -12                       | 92         | -8                        | 47   | -5                        |
| 48           | Copepoda                           | 100              | 0                               | 100  | 0                               | 100                    | 0                                     | 100  | 0                                     | 100        | 0                         | 100  | 0                         | 100        | 0                         | 100  | 0                         |
| 49           | Cyclopoida                         | 100              | 0                               | 100  | 0                               | 100                    | 0                                     | 100  | 0                                     | 100        | 0                         | 100  | 0                         | 100        | 0                         | 100  | 0                         |
| 50           | Communostraca                      | 96               | 12                              | 99   | 0                               | 95                     | 11                                    | 97   | -1                                    | 90         | 6                         | 97   | -1                        | 97         | 13                        | 98   | -1                        |
| 51           | Malacostraca                       | 100              | 0                               | 100  | 0                               | 100                    | 0                                     | 100  | 0                                     | 100        | 0                         | 100  | 0                         | 100        | 0                         | 100  | 0                         |
| 52           | Eumalacostraca                     | 100              | 0                               | 100  | 0                               | 100                    | 0                                     | 100  | 0                                     | 100        | 0                         | 100  | 0                         | 100        | 0                         | 100  | 0                         |
| 53           | Eucarida + Peracarida              | 80               | -7                              | 86   | -2                              | 79                     | -8                                    | 84   | -3                                    | 81         | -6                        | 85   | -2                        | 85         | -2                        | 79   | -8                        |
| 54           | Thecostraca                        | 100              | 0                               | 100  | 0                               | 100                    | 0                                     | 100  | 0                                     | 100        | 0                         | 100  | 0                         | 100        | 0                         | 100  | 0                         |
| 55           | Thoracica                          | 100              | 0                               | 100  | 0                               | 100                    | 0                                     | 100  | 0                                     | 100        | 0                         | 100  | 0                         | 100        | 0                         | 100  | 0                         |
| 56           | Sessilia                           | 96               | -1                              | 98   | 1                               | 96                     | -1                                    | 96   | 0                                     | 95         | -2                        | 98   | 2                         | 93         | -4                        | 94   | -3                        |
| 57           | Miracrustacea                      | 27               | -67                             | 13   | -3                              | 38                     | -56                                   | 20   | 4                                     | 42         | -52                       | 15   | -1                        | 33         | -61                       | 4    | -12                       |
| 58           | Xenocarida                         | 52               | -41                             | 44   | -11                             | 68                     | -25                                   | 60   | 5                                     | 69         | -24                       | 73   | 18                        | 61         | -32                       | 55   | 0                         |
| 59           | Hexapoda                           | 100              | 0                               | 100  | 0                               | 100                    | 0                                     | 100  | 0                                     | 100        | 0                         | 100  | 0                         | 100        | 0                         | 100  | 0                         |
| 60           | Entognatha                         | 34               | -52                             | 34   | -51                             | 40                     | -46                                   | 53   | -32                                   | 71         | -15                       | 62   | -23                       | 50         | -36                       | 60   | -26                       |
| 61           | Diplura                            | 100              | 0                               | 100  | 0                               | 100                    | 0                                     | 100  | 0                                     | 100        | 0                         | 100  | 0                         | 100        | 0                         | 100  | 0                         |
| 62           | Collembola                         | 100              | 0                               | 100  | 0                               | 100                    | 0                                     | 100  | 0                                     | 100        | 0                         | 100  | 0                         | 100        | 0                         | 100  | 0                         |
| 63           | Entomobryomorpha                   | 99               | 1                               | 98   | 1                               | 100                    | 2                                     | 98   | 2                                     | 100        | 2                         | 99   | 2                         | 99         | 1                         | 97   | 0                         |
| 64           | Insecta                            | 100              | 0                               | 100  | 0                               | 100                    | 0                                     | 100  | 0                                     | 100        | 0                         | 100  | 0                         | 100        | 0                         | 100  | 0                         |
| 65           | Archaeognatha                      | 100              | 0                               | 100  | 0                               | 100                    | 0                                     | 100  | 0                                     | 100        | 0                         | 100  | 0                         | 100        | 0                         | 100  | 0                         |
| 66           | Dicondylia                         | 100              | 0                               | 100  | 0                               | 100                    | 0                                     | 100  | 0                                     | 100        | 0                         | 100  | 0                         | 100        | 0                         | 100  | 0                         |
| 67           | Zygentoma                          | 100              | 0                               | 100  | 0                               | 100                    | 0                                     | 100  | 0                                     | 100        | 0                         | 100  | 0                         | 100        | 0                         | 100  | 0                         |
| 68           | Pterygota                          | 95               | -4                              | 97   | -3                              | 96                     | -3                                    | 97   | -2                                    | 99         | 0                         | 98   | -2                        | 95         | -4                        | 99   | 0                         |
| 69           | Paleoptera                         | 65               | -4                              | 89   | 1                               | 74                     | 5                                     | 93   | 5                                     | 61         | -8                        | 87   | -1                        | 81         | 12                        | 89   | 1                         |
| 70           | Ephemeroptera                      | 100              | 0                               | 100  | 0                               | 100                    | 0                                     | 100  | 0                                     | 100        | 0                         | 100  | 0                         | 100        | 0                         | 100  | 0                         |
| 71           | Odonata                            | 100              | 0                               | 100  | 0                               | 100                    | 0                                     | 100  | 0                                     | 100        | 0                         | 100  | 0                         | 100        | 0                         | 100  | 0                         |
| 72           | Neoptera                           | 92               | -5                              | 94   | -2                              | 94                     | -3                                    | 95   | -1                                    | 90         | -7                        | 92   | -4                        | 99         | 2                         | 98   | 2                         |
| 73           | Polyneoptera                       | 100              | 1                               | 100  | 0                               | 100                    | 1                                     | 100  | 0                                     | 100        | 1                         | 100  | 0                         | 100        | 1                         | 100  | 0                         |
| 74           | Blattodea + Orthoptera             | 93               | -1                              | 92   | -3                              | 89                     | -5                                    | 86   | -9                                    | 82         | -12                       | 91   | -4                        | 94         | 0                         | 97   | 2                         |
| 75           | Lepidoptera                        | 100              | 0                               | 100  | 0                               | 100                    | 0                                     | 100  | 0                                     | 100        | 0                         | 100  | 0                         | 100        | 0                         | 100  | 0                         |
| 76           | Ditrysia                           | 100              | 0                               | 100  | 0                               | 100                    | 0                                     | 100  | 0                                     | 100        | 0                         | 100  | 0                         | 100        | 0                         | 100  | 0                         |

| node<br>index<br># | no non-co-Ser1,<br>no non-co-Ser2 |                                                        |      |                                                        | no non-co-Ser1 |                                     |      |                                     | no non-co-Ser2 |                                     |      |                                     | no non-Ser<br>at co-Ser |                                        | split co-Ser:<br>non-Ser/Ser |                                                       |
|--------------------|-----------------------------------|--------------------------------------------------------|------|--------------------------------------------------------|----------------|-------------------------------------|------|-------------------------------------|----------------|-------------------------------------|------|-------------------------------------|-------------------------|----------------------------------------|------------------------------|-------------------------------------------------------|
|                    | degen<br>1                        | Δ<br>(no non-co-Ser1,<br>no non-co-Ser2 -<br>standard) | 20AA | Δ<br>(no non-co-Ser1,<br>no non-co-Ser2 -<br>standard) | degen<br>1     | Δ<br>(no non-co-Ser1 -<br>standard) | 20AA | Δ<br>(no non-co-Ser1 -<br>standard) | degen<br>1     | Δ<br>(no non-co-Ser2 -<br>standard) | 20AA | Δ<br>(no non-co-Ser2 -<br>standard) | degen<br>1              | Δ<br>(co-Ser1-Ser2-only -<br>standard) | degen1                       | Δ<br>(split non-Ser at co-Ser / co-Ser -<br>standard) |
| 32                 | 94                                | 2                                                      | 67   | 2                                                      | 94             | 2                                   | 61   | -3                                  | 92             | 0                                   | 64   | 0                                   | 88                      | -4                                     | 90                           | -2                                                    |
| 40                 | 88                                | -5                                                     | 16   | -4                                                     | 90             | -3                                  | 11   | -9                                  | 90             | -3                                  | 19   | -1                                  | 93                      | 0                                      | 95                           | 2                                                     |
| 41                 | 78                                | -8                                                     | 21   | -3                                                     | 82             | -4                                  | 17   | -7                                  | 84             | -2                                  | 21   | -2                                  | 85                      | -1                                     | 96                           | 10                                                    |
| 47                 | 100                               | 0                                                      | 47   | -5                                                     | 100            | 0                                   | 43   | -9                                  | 100            | 0                                   | 52   | 0                                   | 99                      | -1                                     | 100                          | 0                                                     |
| 57                 | 91                                | -3                                                     | 11   | -5                                                     | 93             | -1                                  | 9    | -7                                  | 93             | -1                                  | 15   | -1                                  | 84                      | -10                                    | 97                           | 3                                                     |
| 58                 | 91                                | -2                                                     | 46   | -9                                                     | 92             | -1                                  | 41   | -14                                 | 92             | -1                                  | 57   | 2                                   | 65                      | -28                                    | 94                           | 1                                                     |
| 1                  | 100                               | 0                                                      | 100  | 0                                                      | 100            | 0                                   | 100  | 0                                   | 100            | 0                                   | 100  | 0                                   | 100                     | 0                                      | 100                          | 0                                                     |
| 2                  | 100                               | 0                                                      | 100  | 0                                                      | 100            | 0                                   | 100  | 0                                   | 100            | 0                                   | 100  | 0                                   | 100                     | 0                                      | 100                          | 0                                                     |
| 3                  | 100                               | 0                                                      | 100  | 0                                                      | 100            | 0                                   | 100  | 0                                   | 100            | 0                                   | 100  | 0                                   | 100                     | 0                                      | 100                          | 0                                                     |
| 4                  | 100                               | 0                                                      | 100  | 0                                                      | 100            | 0                                   | 100  | 0                                   | 100            | 0                                   | 100  | 0                                   | 100                     | 0                                      | 100                          | 0                                                     |
| 5                  | 100                               | 0                                                      | 100  | 0                                                      | 100            | 0                                   | 100  | 0                                   | 100            | 0                                   | 100  | 0                                   | 100                     | 0                                      | 100                          | 0                                                     |
| 6                  | 92                                | -1                                                     | 93   | 1                                                      | 93             | 0                                   | 93   | 1                                   | 93             | 0                                   | 93   | 1                                   | 85                      | -8                                     | 87                           | -6                                                    |
| 8                  | 99                                | 0                                                      | 93   | 4                                                      | 99             | 0                                   | 91   | 1                                   | 99             | 0                                   | 93   | 4                                   | 91                      | -8                                     | 98                           | -1                                                    |
| 9                  | 99                                | 1                                                      | 97   | 1                                                      | 100            | 2                                   | 97   | 0                                   | 98             | 0                                   | 98   | 1                                   | 94                      | -4                                     | 97                           | -1                                                    |
| 12                 | 100                               | 0                                                      | 100  | 0                                                      | 100            | 0                                   | 100  | 0                                   | 100            | 0                                   | 100  | 0                                   | 100                     | 0                                      | 100                          | 0                                                     |
| 13                 | 100                               | 0                                                      | 100  | 0                                                      | 100            | 0                                   | 100  | 0                                   | 100            | 0                                   | 100  | 0                                   | 100                     | 0                                      | 100                          | 0                                                     |
| 14                 | 72                                | 4                                                      | 26   | 9                                                      | 65             | -3                                  | 17   | 0                                   | 70             | 2                                   | 19   | 2                                   | 35                      | -33                                    | 65                           | -3                                                    |
| 15                 | 59                                | -6                                                     | 59   | -13                                                    | 55             | -10                                 | 59   | -12                                 | 66             | 1                                   | 71   | 0                                   | 67                      | 2                                      | 67                           | 2                                                     |
| 16                 | 100                               | 0                                                      | 100  | 0                                                      | 100            | 0                                   | 100  | 0                                   | 100            | 0                                   | 100  | 0                                   | 100                     | 0                                      | 100                          | 0                                                     |
| 17                 | 98                                | -1                                                     | 93   | -4                                                     | 99             | 0                                   | 94   | -3                                  | 98             | -1                                  | 96   | -1                                  | 100                     | 1                                      | 100                          | 1                                                     |
| 18                 | 100                               | 0                                                      | 98   | 0                                                      | 100            | 0                                   | 99   | 1                                   | 100            | 0                                   | 98   | 0                                   | 100                     | 0                                      | 100                          | 0                                                     |
| 19                 | 100                               | 0                                                      | 100  | 0                                                      | 100            | 0                                   | 100  | 0                                   | 100            | 0                                   | 100  | 0                                   | 95                      | -5                                     | 99                           | -1                                                    |
| 20                 | 99                                | 0                                                      | 98   | 0                                                      | 100            | 1                                   | 98   | 0                                   | 99             | 0                                   | 98   | -1                                  | 100                     | 1                                      | 99                           | 0                                                     |
| 21                 | 100                               | 0                                                      | 100  | 0                                                      | 100            | 0                                   | 100  | 0                                   | 100            | 0                                   | 100  | 0                                   | 100                     | 0                                      | 100                          | 0                                                     |
| 22                 | 100                               | 0                                                      | 100  | 0                                                      | 100            | 0                                   | 100  | 0                                   | 100            | 0                                   | 100  | 0                                   | 100                     | 0                                      | 100                          | 0                                                     |
| 23                 | 83                                | -10                                                    | 86   | -6                                                     | 86             | -7                                  | 86   | -6                                  | 92             | -1                                  | 93   | 1                                   | 98                      | 5                                      | 98                           | 5                                                     |
| 24                 | 98                                | -1                                                     | 90   | -7                                                     | 97             | -2                                  | 91   | -6                                  | 100            | 1                                   | 98   | 1                                   | 86                      | -13                                    | 95                           | -4                                                    |
| 27                 | 100                               | 1                                                      | 99   | 2                                                      | 99             | 0                                   | 98   | 2                                   | 99             | 0                                   | 99   | 2                                   | 94                      | -5                                     | 98                           | -1                                                    |
| 28                 | 100                               | 0                                                      | 100  | 0                                                      | 100            | 0                                   | 100  | 0                                   | 100            | 0                                   | 100  | 0                                   | 100                     | 0                                      | 100                          | 0                                                     |
| 32                 | 94                                | 2                                                      | 67   | 2                                                      | 94             | 2                                   | 61   | -3                                  | 92             | 0                                   | 64   | 0                                   | 88                      | -4                                     | 90                           | -2                                                    |
| 33                 | 100                               | 0                                                      | 100  | 0                                                      | 100            | 0                                   | 100  | 0                                   | 100            | 0                                   | 100  | 0                                   | 100                     | 0                                      | 100                          | 0                                                     |
| 34                 | 100                               | 0                                                      | 100  | 0                                                      | 100            | 0                                   | 100  | 0                                   | 100            | 0                                   | 100  | 0                                   | 100                     | 0                                      | 100                          | 0                                                     |
| 35                 | 100                               | 0                                                      | 99   | 1                                                      | 99             | -1                                  | 97   | -1                                  | 99             | -1                                  | 98   | 0                                   | 94                      | -6                                     | 99                           | -1                                                    |
| 37                 | 100                               | 0                                                      | 100  | 0                                                      | 100            | 0                                   | 100  | 0                                   | 100            | 0                                   | 100  | 0                                   | 100                     | 0                                      | 100                          | 0                                                     |
| 39                 | 100                               | 0                                                      | 100  | 0                                                      | 100            | 0                                   | 100  | 0                                   | 100            | 0                                   | 100  | 0                                   | 100                     | 0                                      | 100                          | 0                                                     |
| 40                 | 88                                | -5                                                     | 16   | -4                                                     | 90             | -3                                  | 11   | -9                                  | 90             | -3                                  | 19   | -1                                  | 93                      | 0                                      | 95                           | 2                                                     |
| 41                 | 78                                | -8                                                     | 21   | -3                                                     | 82             | -4                                  | 17   | -7                                  | 84             | -2                                  | 21   | -2                                  | 85                      | -1                                     | 96                           | 10                                                    |
| 42                 | 100                               | 0                                                      | 100  | 0                                                      | 100            | 0                                   | 100  | 0                                   | 100            | 0                                   | 100  | 0                                   | 100                     | 0                                      | 100                          | 0                                                     |
| 43                 | 100                               | 0                                                      | 100  | 0                                                      | 100            | 0                                   | 100  | 0                                   | 100            | 0                                   | 100  | 0                                   | 100                     | 0                                      | 100                          | 0                                                     |
| 44                 | 100                               | 0                                                      | 100  | 0                                                      | 100            | 0                                   | 100  | 0                                   | 100            | 0                                   | 100  | 0                                   | 100                     | 0                                      | 100                          | 0                                                     |
| 45                 | 100                               | 0                                                      | 100  | 0                                                      | 100            | 0                                   | 100  | 0                                   | 100            | 0                                   | 99   | -1                                  | 100                     | 0                                      | 100                          | 0                                                     |
| 46                 | 100                               | 0                                                      | 100  | 0                                                      | 100            | 0                                   | 100  | 0                                   | 100            | 0                                   | 100  | 0                                   | 100                     | 0                                      | 100                          | 0                                                     |
| 47                 | 100                               | 0                                                      | 47   | -5                                                     | 100            | 0                                   | 43   | -9                                  | 100            | 0                                   | 52   | 0                                   | 99                      | -1                                     | 100                          | 0                                                     |
| 48                 | 100                               | 0                                                      | 100  | 0                                                      | 100            | 0                                   | 100  | 0                                   | 100            | 0                                   | 100  | 0                                   | 100                     | 0                                      | 100                          | 0                                                     |
| 49                 | 100                               | 0                                                      | 100  | 0                                                      | 100            | 0                                   | 100  | 0                                   | 100            | 0                                   | 100  | 0                                   | 100                     | 0                                      | 100                          | 0                                                     |
| 50                 | 83                                | -1                                                     | 97   | -2                                                     | 82             | -2                                  | 98   | 0                                   | 85             | 1                                   | 97   | -1                                  | 44                      | -40                                    | 76                           | -8                                                    |
| 51                 | 100                               | 0                                                      | 100  | 0                                                      | 100            | 0                                   | 100  | 0                                   | 100            | 0                                   | 100  | 0                                   | 100                     | 0                                      | 100                          | 0                                                     |
| 52                 | 100                               | 0                                                      | 100  | 0                                                      | 100            | 0                                   | 100  | 0                                   | 100            | 0                                   | 100  | 0                                   | 100                     | 0                                      | 100                          | 0                                                     |
| 53                 | 81                                | -6                                                     | 87   | 0                                                      | 82             | -5                                  | 81   | -6                                  | 86             | -1                                  | 92   | 5                                   | 76                      | -11                                    | 85                           | -2                                                    |
| 54                 | 100                               | 0                                                      | 100  | 0                                                      | 100            | 0                                   | 100  | 0                                   | 100            | 0                                   | 100  | 0                                   | 100                     | 0                                      | 100                          | 0                                                     |
| 55                 | 100                               | 0                                                      | 100  | 0                                                      | 100            | 0                                   | 100  | 0                                   | 100            | 0                                   | 100  | 0                                   | 100                     | 0                                      | 100                          | 0                                                     |
| 56                 | 97                                | 0                                                      | 95   | -2                                                     | 94             | -3                                  | 94   | -3                                  | 98             | 1                                   | 95   | -2                                  | 97                      | 0                                      | 98                           | 1                                                     |
| 57                 | 91                                | -3                                                     | 11   | -5                                                     | 93             | -1                                  | 9    | -7                                  | 93             | -1                                  | 15   | -1                                  | 84                      | -10                                    | 97                           | 3                                                     |
| 58                 | 91                                | -2                                                     | 46   | -9                                                     | 92             | -1                                  | 41   | -14                                 | 92             | -1                                  | 57   | 2                                   | 65                      | -28                                    | 94                           | 1                                                     |
| 59                 | 100                               | 0                                                      | 100  | 0                                                      | 100            | 0                                   | 100  | 0                                   | 100            | 0                                   | 100  | 0                                   | 100                     | 0                                      | 100                          | 0                                                     |
| 60                 | 80                                | -6                                                     | 85   | 0                                                      | 80             | -6                                  | 86   | 1                                   | 83             | -3                                  | 89   | 4                                   | 85                      | -1                                     | 66                           | -20                                                   |
| 61                 | 100                               | 0                                                      | 100  | 0                                                      | 100            | 0                                   | 100  | 0                                   | 100            | 0                                   | 100  | 0                                   | 100                     | 0                                      | 100                          | 0                                                     |
| 62                 | 100                               | 0                                                      | 100  | 0                                                      | 100            | 0                                   | 100  | 0                                   | 100            | 0                                   | 100  | 0                                   | 100                     | 0                                      | 100                          | 0                                                     |
| 63                 | 90                                | -8                                                     | 93   | -4                                                     | 93             | -5                                  | 97   | 0                                   | 94             | -4                                  | 93   | -4                                  | 99                      | 1                                      | 99                           | 1                                                     |
| 64                 | 100                               | 0                                                      | 100  | 0                                                      | 100            | 0                                   | 100  | 0                                   | 100            | 0                                   | 100  | 0                                   | 100                     | 0                                      | 100                          | 0                                                     |
| 65                 | 100                               | 0                                                      | 100  | 0                                                      | 100            | 0                                   | 100  | 0                                   | 100            | 0                                   | 100  | 0                                   | 100                     | 0                                      | 100                          | 0                                                     |
| 66                 | 100                               | 0                                                      | 100  | 0                                                      | 100            | 0                                   | 100  | 0                                   | 100            | 0                                   | 100  | 0                                   | 100                     | 0                                      | 100                          | 0                                                     |
| 67                 | 100                               | 0                                                      | 100  | 0                                                      | 100            | 0                                   | 100  | 0                                   | 100            | 0                                   | 100  | 0                                   | 100                     | 0                                      | 100                          | 0                                                     |
| 68                 | 100                               | 1                                                      | 99   | 0                                                      | 100            | 1                                   | 98   | -1                                  | 99             | 0                                   | 98   | -1                                  | 98                      | -1                                     | 97                           | -2                                                    |
| 69                 | 61                                | -8                                                     | 86   | -2                                                     | 58             | -11                                 | 85   | -3                                  | 69             | 0                                   | 89   | 1                                   | 53                      | -16                                    | 72                           | 3                                                     |
| 70                 | 100                               | 0                                                      | 100  | 0                                                      | 100            | 0                                   | 100  | 0                                   | 100            | 0                                   | 100  | 0                                   | 100                     | 0                                      | 100                          | 0                                                     |
| 71                 | 100                               | 0                                                      | 100  | 0                                                      | 100            | 0                                   | 100  | 0                                   | 100            | 0                                   | 100  | 0                                   | 100                     | 0                                      | 100                          | 0                                                     |
| 72                 | 97                                | 0                                                      | 95   | 0                                                      | 97             | 0                                   | 94   | -1                                  | 97             | 0                                   | 94   | -1                                  | 96                      | -1                                     | 91                           | -6                                                    |
| 73                 | 99                                | 0                                                      | 100  | 0                                                      | 100            | 1                                   | 100  | 0                                   | 99             | 0                                   | 100  | 0                                   | 98                      | -1                                     | 100                          | 1                                                     |
| 74                 | 95                                | 1                                                      | 97   | 2                                                      | 94             | 0                                   | 97   | 2                                   | 96             | 2                                   | 92   | -3                                  | 93                      | -1                                     | 92                           | -2                                                    |
| 75                 | 100                               | 0                                                      | 100  | 0                                                      | 100            | 0                                   | 100  | 0                                   | 100            | 0                                   | 100  | 0                                   | 100                     | 0                                      | 100                          | 0                                                     |
| 76                 | 100                               | 0                                                      | 100  | 0                                                      | 100            | 0                                   | 100  | 0                                   | 100            | 0                                   | 100  | 0                                   | 100                     | 0                                      | 100                          | 0                                                     |

| node index # | Ser1 to Ser2 |                             |      |                             | Ser2 to Ser1 |                             |      |                             | co-Ser1 to Phe |                               |      |                               | co-Ser1 to Trp |                               |      |                               | co-Ser1 to Tyr |                               |      |                               |
|--------------|--------------|-----------------------------|------|-----------------------------|--------------|-----------------------------|------|-----------------------------|----------------|-------------------------------|------|-------------------------------|----------------|-------------------------------|------|-------------------------------|----------------|-------------------------------|------|-------------------------------|
|              | degen 1      | Δ (Ser1 to Ser2 - standard) | 20AA | Δ (Ser1 to Ser2 - standard) | degen 1      | Δ (Ser2 to Ser1 - standard) | 20AA | Δ (Ser2 to Ser1 - standard) | degen 1        | Δ (co-Ser1 to Phe - standard) | 20AA | Δ (co-Ser1 to Phe - standard) | degen 1        | Δ (co-Ser1 to Trp - standard) | 20AA | Δ (co-Ser1 to Trp - standard) | degen 1        | Δ (co-Ser1 to Tyr - standard) | 20AA | Δ (co-Ser1 to Tyr - standard) |
| 32           | 54           | -38                         | 72   | 8                           | 66           | -26                         | 67   | 3                           | 96             | 4                             | 94   | 29                            | 93             | 1                             | 95   | 30                            | 95             | 3                             | 95   | 31                            |
| 40           | 57           | -36                         | 20   | 1                           | 63           | -30                         | 18   | -1                          | 91             | -2                            | 59   | 39                            | 95             | 2                             | 69   | 49                            | 91             | -2                            | 65   | 45                            |
| 41           | 40           | -46                         | 25   | 1                           | 47           | -39                         | 21   | -3                          | 86             | 0                             | 59   | 35                            | 92             | 6                             | 66   | 42                            | 87             | 1                             | 70   | 46                            |
| 47           | 84           | -16                         | 56   | 4                           | 90           | -10                         | 53   | 1                           | 100            | 0                             | 89   | 37                            | 100            | 0                             | 97   | 45                            | 100            | 0                             | 95   | 43                            |
| 57           | 42           | -52                         | 15   | -1                          | 41           | -53                         | 13   | -3                          | 88             | -6                            | 65   | 49                            | 91             | -3                            | 64   | 48                            | 87             | -7                            | 67   | 51                            |
| 58           | 59           | -34                         | 53   | -2                          | 58           | -35                         | 56   | 1                           | 86             | -7                            | 84   | 29                            | 90             | -3                            | 84   | 29                            | 87             | -6                            | 83   | 28                            |
| 1            | 100          | 0                           | 100  | 0                           | 100          | 0                           | 100  | 0                           | 100            | 0                             | 100  | 0                             | 100            | 0                             | 100  | 0                             | 100            | 0                             | 100  | 0                             |
| 2            | 100          | 0                           | 100  | 0                           | 100          | 0                           | 100  | 0                           | 100            | 0                             | 100  | 0                             | 100            | 0                             | 100  | 0                             | 100            | 0                             | 100  | 0                             |
| 3            | 100          | 0                           | 100  | 0                           | 100          | 0                           | 100  | 0                           | 100            | 0                             | 100  | 0                             | 100            | 0                             | 100  | 0                             | 100            | 0                             | 100  | 0                             |
| 4            | 100          | 0                           | 100  | 0                           | 100          | 0                           | 100  | 0                           | 100            | 0                             | 100  | 0                             | 100            | 0                             | 100  | 0                             | 100            | 0                             | 100  | 0                             |
| 5            | 100          | 0                           | 100  | 0                           | 100          | 0                           | 100  | 0                           | 100            | 0                             | 100  | 0                             | 100            | 0                             | 100  | 0                             | 100            | 0                             | 100  | 0                             |
| 6            | 82           | -11                         | 95   | 2                           | 89           | -4                          | 97   | 4                           | 89             | -4                            | 94   | 2                             | 88             | -5                            | 95   | 2                             | 88             | -5                            | 94   | 1                             |
| 8            | 96           | -3                          | 91   | 2                           | 99           | 0                           | 91   | 2                           | 99             | 0                             | 92   | 2                             | 99             | 0                             | 92   | 2                             | 98             | -1                            | 90   | 1                             |
| 9            | 98           | 0                           | 99   | 2                           | 98           | 0                           | 95   | -2                          | 98             | 0                             | 98   | 1                             | 98             | 0                             | 96   | -1                            | 98             | 0                             | 98   | 1                             |
| 12           | 100          | 0                           | 100  | 0                           | 100          | 0                           | 100  | 0                           | 100            | 0                             | 100  | 0                             | 100            | 0                             | 100  | 0                             | 100            | 0                             | 100  | 0                             |
| 13           | 100          | 0                           | 100  | 0                           | 100          | 0                           | 100  | 0                           | 100            | 0                             | 100  | 0                             | 100            | 0                             | 100  | 0                             | 100            | 0                             | 100  | 0                             |
| 14           | 50           | -18                         | 16   | -1                          | 63           | -5                          | 16   | -1                          | 62             | -6                            | 14   | -3                            | 66             | -2                            | 25   | 8                             | 60             | -8                            | 11   | -6                            |
| 15           | 82           | 17                          | 73   | 2                           | 67           | 2                           | 73   | 1                           | 67             | 2                             | 77   | 6                             | 66             | 1                             | 84   | 12                            | 61             | -4                            | 82   | 11                            |
| 16           | 100          | 0                           | 100  | 0                           | 100          | 0                           | 100  | 0                           | 100            | 0                             | 100  | 0                             | 100            | 0                             | 100  | 0                             | 100            | 0                             | 100  | 0                             |
| 17           | 93           | -6                          | 97   | -1                          | 99           | 0                           | 98   | 0                           | 99             | 0                             | 99   | 1                             | 97             | -2                            | 95   | -2                            | 98             | -1                            | 94   | -3                            |
| 18           | 100          | 0                           | 97   | -1                          | 100          | 0                           | 97   | -1                          | 100            | 0                             | 98   | 0                             | 100            | 0                             | 99   | 1                             | 100            | 0                             | 98   | 0                             |
| 19           | 100          | 0                           | 99   | 0                           | 99           | -1                          | 100  | 0                           | 100            | 0                             | 100  | 0                             | 100            | 0                             | 100  | 0                             | 100            | 0                             | 100  | 0                             |
| 20           | 99           | 0                           | 99   | 0                           | 100          | 1                           | 99   | 0                           | 98             | -1                            | 96   | -2                            | 97             | -2                            | 92   | -7                            | 96             | -3                            | 94   | -5                            |
| 21           | 100          | 0                           | 100  | 0                           | 100          | 0                           | 100  | 0                           | 100            | 0                             | 100  | 0                             | 100            | 0                             | 99   | -1                            | 100            | 0                             | 100  | 0                             |
| 22           | 100          | 0                           | 100  | 0                           | 100          | 0                           | 100  | 0                           | 100            | 0                             | 100  | 0                             | 100            | 0                             | 100  | 0                             | 100            | 0                             | 100  | 0                             |
| 23           | 96           | 3                           | 90   | -2                          | 95           | 2                           | 91   | -1                          | 96             | 3                             | 77   | -15                           | 95             | 2                             | 73   | -19                           | 96             | 3                             | 78   | -14                           |
| 24           | 100          | 1                           | 97   | 0                           | 100          | 1                           | 98   | 1                           | 98             | -1                            | 92   | -5                            | 100            | 1                             | 89   | -8                            | 99             | 0                             | 95   | -2                            |
| 27           | 99           | 0                           | 97   | 1                           | 100          | 1                           | 97   | 1                           | 99             | 0                             | 99   | 3                             | 100            | 1                             | 97   | 1                             | 99             | 0                             | 97   | 1                             |
| 28           | 100          | 0                           | 100  | 0                           | 100          | 0                           | 100  | 0                           | 100            | 0                             | 100  | 0                             | 100            | 0                             | 100  | 0                             | 100            | 0                             | 100  | 0                             |
| 32           | 54           | -38                         | 72   | 8                           | 66           | -26                         | 67   | 3                           | 96             | 4                             | 94   | 29                            | 93             | 1                             | 95   | 30                            | 95             | 3                             | 95   | 31                            |
| 33           | 100          | 0                           | 100  | 0                           | 100          | 0                           | 100  | 0                           | 100            | 0                             | 100  | 0                             | 100            | 0                             | 100  | 0                             | 100            | 0                             | 100  | 0                             |
| 34           | 100          | 0                           | 100  | 0                           | 100          | 0                           | 100  | 0                           | 100            | 0                             | 100  | 0                             | 100            | 0                             | 100  | 0                             | 100            | 0                             | 100  | 0                             |
| 35           | 99           | -1                          | 99   | 1                           | 100          | 0                           | 99   | 1                           | 99             | -1                            | 99   | 1                             | 99             | -1                            | 98   | 0                             | 100            | 0                             | 97   | -1                            |
| 37           | 100          | 0                           | 100  | 0                           | 100          | 0                           | 100  | 0                           | 100            | 0                             | 100  | 0                             | 100            | 0                             | 100  | 0                             | 100            | 0                             | 100  | 0                             |
| 39           | 100          | 0                           | 100  | 0                           | 100          | 0                           | 100  | 0                           | 100            | 0                             | 100  | 0                             | 100            | 0                             | 100  | 0                             | 100            | 0                             | 100  | 0                             |
| 40           | 57           | -36                         | 20   | 1                           | 63           | -30                         | 18   | -1                          | 91             | -2                            | 59   | 39                            | 95             | 2                             | 69   | 49                            | 91             | -2                            | 65   | 45                            |
| 41           | 40           | -46                         | 25   | 1                           | 47           | -39                         | 21   | -3                          | 86             | 0                             | 59   | 35                            | 92             | 6                             | 66   | 42                            | 87             | 1                             | 70   | 46                            |
| 42           | 100          | 0                           | 100  | 0                           | 100          | 0                           | 100  | 0                           | 100            | 0                             | 100  | 0                             | 100            | 0                             | 100  | 0                             | 100            | 0                             | 100  | 0                             |
| 43           | 100          | 0                           | 100  | 0                           | 100          | 0                           | 100  | 0                           | 100            | 0                             | 100  | 0                             | 100            | 0                             | 100  | 0                             | 100            | 0                             | 100  | 0                             |
| 44           | 100          | 0                           | 100  | 0                           | 100          | 0                           | 100  | 0                           | 100            | 0                             | 100  | 0                             | 100            | 0                             | 100  | 0                             | 100            | 0                             | 100  | 0                             |
| 45           | 100          | 0                           | 100  | 0                           | 100          | 0                           | 100  | 0                           | 100            | 0                             | 100  | 0                             | 100            | 0                             | 99   | -1                            | 100            | 0                             | 100  | 0                             |
| 46           | 100          | 0                           | 100  | 0                           | 100          | 0                           | 100  | 0                           | 100            | 0                             | 100  | 0                             | 100            | 0                             | 100  | 0                             | 100            | 0                             | 100  | 0                             |
| 47           | 84           | -16                         | 56   | 4                           | 90           | -10                         | 53   | 1                           | 100            | 0                             | 89   | 37                            | 100            | 0                             | 97   | 45                            | 100            | 0                             | 95   | 43                            |
| 48           | 100          | 0                           | 100  | 0                           | 100          | 0                           | 100  | 0                           | 100            | 0                             | 100  | 0                             | 100            | 0                             | 100  | 0                             | 100            | 0                             | 100  | 0                             |
| 49           | 100          | 0                           | 100  | 0                           | 100          | 0                           | 100  | 0                           | 100            | 0                             | 100  | 0                             | 100            | 0                             | 100  | 0                             | 100            | 0                             | 100  | 0                             |
| 50           | 86           | 2                           | 98   | -1                          | 98           | 14                          | 98   | -1                          | 81             | -3                            | 86   | -13                           | 86             | 2                             | 72   | -27                           | 77             | -7                            | 87   | -11                           |
| 51           | 100          | 0                           | 100  | 0                           | 100          | 0                           | 100  | 0                           | 100            | 0                             | 100  | 0                             | 100            | 0                             | 100  | 0                             | 100            | 0                             | 100  | 0                             |
| 52           | 100          | 0                           | 100  | 0                           | 100          | 0                           | 100  | 0                           | 100            | 0                             | 100  | 0                             | 100            | 0                             | 100  | 0                             | 100            | 0                             | 100  | 0                             |
| 53           | 91           | 4                           | 89   | 1                           | 79           | -8                          | 86   | -1                          | 70             | -17                           | 71   | -16                           | 77             | -10                           | 57   | -30                           | 76             | -11                           | 73   | -14                           |
| 54           | 100          | 0                           | 100  | 0                           | 100          | 0                           | 100  | 0                           | 100            | 0                             | 100  | 0                             | 100            | 0                             | 100  | 0                             | 100            | 0                             | 100  | 0                             |
| 55           | 100          | 0                           | 100  | 0                           | 100          | 0                           | 100  | 0                           | 100            | 0                             | 100  | 0                             | 100            | 0                             | 100  | 0                             | 100            | 0                             | 100  | 0                             |
| 56           | 96           | -1                          | 97   | 0                           | 94           | -3                          | 97   | 1                           | 90             | -7                            | 89   | -7                            | 90             | -7                            | 87   | -10                           | 90             | -7                            | 87   | -9                            |
| 57           | 42           | -52                         | 15   | -1                          | 41           | -53                         | 13   | -3                          | 88             | -6                            | 65   | 49                            | 91             | -3                            | 64   | 48                            | 87             | -7                            | 67   | 51                            |
| 58           | 59           | -34                         | 53   | -2                          | 58           | -35                         | 56   | 1                           | 86             | -7                            | 84   | 29                            | 90             | -3                            | 84   | 29                            | 87             | -6                            | 83   | 28                            |
| 59           | 100          | 0                           | 100  | 0                           | 100          | 0                           | 100  | 0                           | 100            | 0                             | 99   | -1                            | 100            | 0                             | 95   | -5                            | 100            | 0                             | 99   | 0                             |
| 60           | 95           | 9                           | 87   | 2                           | 80           | -6                          | 86   | 1                           | 88             | 2                             | 79   | -7                            | 97             | 11                            | 69   | -16                           | 89             | 3                             | 87   | 2                             |
| 61           | 100          | 0                           | 100  | 0                           | 100          | 0                           | 100  | 0                           | 100            | 0                             | 100  | 0                             | 100            | 0                             | 100  | 0                             | 100            | 0                             | 100  | 0                             |
| 62           | 100          | 0                           | 100  | 0                           | 100          | 0                           | 100  | 0                           | 100            | 0                             | 100  | 0                             | 100            | 0                             | 100  | 0                             | 100            | 0                             | 100  | 0                             |
| 63           | 99           | 1                           | 97   | 0                           | 100          | 2                           | 98   | 1                           | 99             | 1                             | 94   | -3                            | 98             | 0                             | 92   | -5                            | 98             | 0                             | 92   | -5                            |
| 64           | 100          | 0                           | 100  | 0                           | 100          | 0                           | 100  | 0                           | 100            | 0                             | 100  | 0                             | 100            | 0                             | 100  | 0                             | 100            | 0                             | 100  | 0                             |
| 65           | 100          | 0                           | 100  | 0                           | 100          | 0                           | 100  | 0                           | 100            | 0                             | 100  | 0                             | 100            | 0                             | 100  | 0                             | 100            | 0                             | 100  | 0                             |
| 66           | 100          | 0                           | 100  | 0                           | 100          | 0                           | 100  | 0                           | 100            | 0                             | 100  | 0                             | 100            | 0                             | 100  | 0                             | 100            | 0                             | 100  | 0                             |
| 67           | 100          | 0                           | 100  | 0                           | 100          | 0                           | 100  | 0                           | 100            | 0                             | 100  | 0                             | 100            | 0                             | 100  | 0                             | 100            | 0                             | 100  | 0                             |
| 68           | 99           | 0                           | 99   | -1                          | 97           | -2                          | 99   | -1                          | 98             | -1                            | 99   | 0                             | 99             | 0                             | 99   | -1                            | 99             | 0                             | 98   | -1                            |
| 69           | 68           | -1                          | 89   | 0                           | 84           | 15                          | 91   | 3                           | 54             | -15                           | 80   | -8                            | 58             | -11                           | 76   | -12                           | 61             | -8                            | 79   | -9                            |
| 70           | 100          | 0                           | 100  | 0                           | 100          | 0                           | 100  | 0                           | 100            | 0                             | 100  | 0                             | 100            | 0                             | 100  | 0                             | 100            | 0                             | 100  | 0                             |
| 71           | 100          | 0                           | 100  | 0                           | 100          | 0                           | 100  | 0                           | 100            | 0                             | 100  | 0                             | 100            | 0                             | 100  | 0                             | 100            | 0                             | 100  | 0                             |
| 72           | 97           | 0                           | 94   | -1                          | 99           | 2                           | 96   | 1                           | 97             | 0                             | 94   | -1                            | 98             | 1                             | 92   | -3                            | 96             | -1                            | 93   | -3                            |
| 73           | 100          | 1                           | 100  | 0                           | 100          | 1                           | 100  | 0                           | 100            | 1                             | 87   | -12                           | 100            | 1                             | 69   | -31                           | 100            | 1                             | 85   | -15                           |
| 74           | 95           | 1                           | 95   | 0                           | 97           | 3                           | 94   | -1                          | 99             | 5                             | 98   | 3                             | 98             | 4                             | 97   | 2                             | 96             | 2                             | 96   | 1                             |
| 75           | 100          | 0                           | 100  | 0                           | 100          | 0                           | 100  | 0                           | 100            | 0                             | 100  | 0                             | 100            | 0                             | 100  | 0                             | 100            | 0                             | 100  | 0                             |
| 76           | 100          | 0                           | 100  | 0                           | 100          | 0                           | 100  | 0                           | 100            | 0                             | 100  | 0                             | 100            | 0                             | 100  | 0                             | 100            | 0                             | 100  | 0                             |

| node index # | co-Ser2 to Phe |                                      |      |                                      | co-Ser2 to Trp |                                      |      |                                      | co-Ser2 to Tyr |                                      |      |                                      |
|--------------|----------------|--------------------------------------|------|--------------------------------------|----------------|--------------------------------------|------|--------------------------------------|----------------|--------------------------------------|------|--------------------------------------|
|              | degen 1        | $\Delta$ (co-Ser2 to Phe - standard) | 20AA | $\Delta$ (co-Ser2 to Phe - standard) | degen 1        | $\Delta$ (co-Ser2 to Trp - standard) | 20AA | $\Delta$ (co-Ser2 to Trp - standard) | degen 1        | $\Delta$ (co-Ser2 to Tyr - standard) | 20AA | $\Delta$ (co-Ser2 to Tyr - standard) |
| 32           | 78             | -14                                  | 94   | 30                                   | 76             | -16                                  | 95   | 31                                   | 73             | -19                                  | 93   | 29                                   |
| 40           | 88             | -5                                   | 52   | 33                                   | 87             | -6                                   | 67   | 47                                   | 86             | -7                                   | 62   | 42                                   |
| 41           | 73             | -13                                  | 56   | 32                                   | 86             | 0                                    | 69   | 46                                   | 77             | -9                                   | 62   | 38                                   |
| 47           | 100            | 0                                    | 97   | 45                                   | 100            | 0                                    | 98   | 46                                   | 99             | -1                                   | 97   | 45                                   |
| 57           | 82             | -12                                  | 78   | 62                                   | 89             | -5                                   | 80   | 64                                   | 78             | -16                                  | 73   | 57                                   |
| 58           | 84             | -9                                   | 91   | 36                                   | 88             | -5                                   | 92   | 37                                   | 85             | -8                                   | 90   | 35                                   |
| 1            | 100            | 0                                    | 100  | 0                                    | 100            | 0                                    | 100  | 0                                    | 100            | 0                                    | 100  | 0                                    |
| 2            | 100            | 0                                    | 100  | 0                                    | 100            | 0                                    | 100  | 0                                    | 100            | 0                                    | 100  | 0                                    |
| 3            | 100            | 0                                    | 100  | 0                                    | 100            | 0                                    | 100  | 0                                    | 100            | 0                                    | 100  | 0                                    |
| 4            | 100            | 0                                    | 99   | -1                                   | 100            | 0                                    | 99   | -1                                   | 100            | 0                                    | 99   | -1                                   |
| 5            | 100            | 0                                    | 100  | 0                                    | 100            | 0                                    | 100  | 0                                    | 100            | 0                                    | 100  | 0                                    |
| 6            | 94             | 1                                    | 97   | 4                                    | 91             | -2                                   | 96   | 3                                    | 96             | 3                                    | 98   | 5                                    |
| 8            | 99             | 0                                    | 95   | 6                                    | 100            | 1                                    | 96   | 6                                    | 99             | 0                                    | 97   | 7                                    |
| 9            | 96             | -2                                   | 98   | 1                                    | 97             | -1                                   | 95   | -2                                   | 96             | -2                                   | 96   | -1                                   |
| 12           | 100            | 0                                    | 100  | 0                                    | 100            | 0                                    | 100  | 0                                    | 100            | 0                                    | 100  | 0                                    |
| 13           | 100            | 0                                    | 100  | 0                                    | 100            | 0                                    | 100  | 0                                    | 100            | 0                                    | 100  | 0                                    |
| 14           | 69             | 1                                    | 18   | 1                                    | 59             | -9                                   | 24   | 7                                    | 64             | -4                                   | 26   | 9                                    |
| 15           | 70             | 5                                    | 88   | 17                                   | 62             | -3                                   | 82   | 11                                   | 66             | 1                                    | 86   | 15                                   |
| 16           | 100            | 0                                    | 100  | 0                                    | 100            | 0                                    | 100  | 0                                    | 100            | 0                                    | 100  | 0                                    |
| 17           | 98             | -1                                   | 99   | 1                                    | 98             | -1                                   | 99   | 2                                    | 98             | -1                                   | 99   | 2                                    |
| 18           | 100            | 0                                    | 90   | -8                                   | 100            | 0                                    | 87   | -11                                  | 100            | 0                                    | 89   | -9                                   |
| 19           | 100            | 0                                    | 100  | 0                                    | 100            | 0                                    | 100  | 0                                    | 100            | 0                                    | 100  | 0                                    |
| 20           | 99             | 0                                    | 98   | 0                                    | 100            | 1                                    | 99   | 0                                    | 100            | 1                                    | 97   | -2                                   |
| 21           | 100            | 0                                    | 100  | 0                                    | 100            | 0                                    | 99   | -1                                   | 100            | 0                                    | 100  | 0                                    |
| 22           | 100            | 0                                    | 100  | 0                                    | 100            | 0                                    | 100  | 0                                    | 100            | 0                                    | 100  | 0                                    |
| 23           | 93             | 0                                    | 82   | -10                                  | 90             | -3                                   | 81   | -11                                  | 90             | -3                                   | 85   | -7                                   |
| 24           | 100            | 1                                    | 99   | 2                                    | 100            | 1                                    | 99   | 2                                    | 99             | 0                                    | 98   | 1                                    |
| 27           | 100            | 1                                    | 97   | 0                                    | 100            | 1                                    | 96   | 0                                    | 99             | 0                                    | 95   | -1                                   |
| 28           | 100            | 0                                    | 100  | 0                                    | 100            | 0                                    | 100  | 0                                    | 100            | 0                                    | 100  | 0                                    |
| 32           | 78             | -14                                  | 94   | 30                                   | 76             | -16                                  | 95   | 31                                   | 73             | -19                                  | 93   | 29                                   |
| 33           | 100            | 0                                    | 100  | 0                                    | 100            | 0                                    | 100  | 0                                    | 100            | 0                                    | 100  | 0                                    |
| 34           | 100            | 0                                    | 100  | 0                                    | 100            | 0                                    | 100  | 0                                    | 100            | 0                                    | 100  | 0                                    |
| 35           | 100            | 0                                    | 100  | 2                                    | 100            | 0                                    | 100  | 2                                    | 100            | 0                                    | 99   | 1                                    |
| 37           | 100            | 0                                    | 100  | 0                                    | 100            | 0                                    | 100  | 0                                    | 100            | 0                                    | 100  | 0                                    |
| 39           | 100            | 0                                    | 100  | 0                                    | 100            | 0                                    | 100  | 0                                    | 100            | 0                                    | 100  | 0                                    |
| 40           | 88             | -5                                   | 52   | 33                                   | 87             | -6                                   | 67   | 47                                   | 86             | -7                                   | 62   | 42                                   |
| 41           | 73             | -13                                  | 56   | 32                                   | 86             | 0                                    | 69   | 46                                   | 77             | -9                                   | 62   | 38                                   |
| 42           | 100            | 0                                    | 100  | 0                                    | 100            | 0                                    | 100  | 0                                    | 100            | 0                                    | 100  | 0                                    |
| 43           | 100            | 0                                    | 100  | 0                                    | 100            | 0                                    | 100  | 0                                    | 100            | 0                                    | 100  | 0                                    |
| 44           | 100            | 0                                    | 100  | 0                                    | 100            | 0                                    | 100  | 0                                    | 100            | 0                                    | 100  | 0                                    |
| 45           | 100            | 0                                    | 100  | 0                                    | 100            | 0                                    | 100  | 0                                    | 100            | 0                                    | 100  | 0                                    |
| 46           | 100            | 0                                    | 100  | 0                                    | 100            | 0                                    | 100  | 0                                    | 100            | 0                                    | 100  | 0                                    |
| 47           | 100            | 0                                    | 97   | 45                                   | 100            | 0                                    | 98   | 46                                   | 99             | -1                                   | 97   | 45                                   |
| 48           | 100            | 0                                    | 100  | 0                                    | 100            | 0                                    | 100  | 0                                    | 100            | 0                                    | 100  | 0                                    |
| 49           | 100            | 0                                    | 100  | 0                                    | 100            | 0                                    | 100  | 0                                    | 100            | 0                                    | 100  | 0                                    |
| 50           | 98             | 14                                   | 93   | -5                                   | 94             | 10                                   | 83   | -16                                  | 95             | 11                                   | 86   | -12                                  |
| 51           | 100            | 0                                    | 100  | 0                                    | 100            | 0                                    | 100  | 0                                    | 100            | 0                                    | 100  | 0                                    |
| 52           | 100            | 0                                    | 100  | 0                                    | 100            | 0                                    | 100  | 0                                    | 100            | 0                                    | 100  | 0                                    |
| 53           | 85             | -2                                   | 88   | 1                                    | 84             | -3                                   | 90   | 3                                    | 79             | -8                                   | 89   | 2                                    |
| 54           | 100            | 0                                    | 100  | 0                                    | 100            | 0                                    | 100  | 0                                    | 100            | 0                                    | 100  | 0                                    |
| 55           | 100            | 0                                    | 100  | 0                                    | 100            | 0                                    | 100  | 0                                    | 100            | 0                                    | 100  | 0                                    |
| 56           | 97             | 0                                    | 99   | 2                                    | 98             | 1                                    | 100  | 3                                    | 99             | 2                                    | 99   | 3                                    |
| 57           | 82             | -12                                  | 78   | 62                                   | 89             | -5                                   | 80   | 64                                   | 78             | -16                                  | 73   | 57                                   |
| 58           | 84             | -9                                   | 91   | 36                                   | 88             | -5                                   | 92   | 37                                   | 85             | -8                                   | 90   | 35                                   |
| 59           | 100            | 0                                    | 100  | 0                                    | 100            | 0                                    | 98   | -2                                   | 100            | 0                                    | 100  | 0                                    |
| 60           | 68             | -18                                  | 86   | 1                                    | 87             | 1                                    | 87   | 2                                    | 74             | -12                                  | 86   | 1                                    |
| 61           | 100            | 0                                    | 100  | 0                                    | 100            | 0                                    | 100  | 0                                    | 100            | 0                                    | 100  | 0                                    |
| 62           | 100            | 0                                    | 100  | 0                                    | 100            | 0                                    | 100  | 0                                    | 100            | 0                                    | 100  | 0                                    |
| 63           | 95             | -3                                   | 90   | -6                                   | 96             | -2                                   | 90   | -6                                   | 99             | 1                                    | 92   | -5                                   |
| 64           | 100            | 0                                    | 100  | 0                                    | 100            | 0                                    | 100  | 0                                    | 100            | 0                                    | 100  | 0                                    |
| 65           | 100            | 0                                    | 100  | 0                                    | 100            | 0                                    | 100  | 0                                    | 100            | 0                                    | 100  | 0                                    |
| 66           | 100            | 0                                    | 100  | 0                                    | 100            | 0                                    | 100  | 0                                    | 100            | 0                                    | 100  | 0                                    |
| 67           | 100            | 0                                    | 100  | 0                                    | 100            | 0                                    | 100  | 0                                    | 100            | 0                                    | 100  | 0                                    |
| 68           | 94             | -5                                   | 96   | -3                                   | 94             | -5                                   | 98   | -1                                   | 95             | -4                                   | 97   | -2                                   |
| 69           | 70             | 1                                    | 84   | -5                                   | 73             | 4                                    | 81   | -7                                   | 71             | 2                                    | 84   | -4                                   |
| 70           | 100            | 0                                    | 100  | 0                                    | 100            | 0                                    | 100  | 0                                    | 100            | 0                                    | 100  | 0                                    |
| 71           | 100            | 0                                    | 100  | 0                                    | 100            | 0                                    | 100  | 0                                    | 100            | 0                                    | 100  | 0                                    |
| 72           | 98             | 1                                    | 93   | -2                                   | 98             | 1                                    | 88   | -8                                   | 99             | 2                                    | 93   | -3                                   |
| 73           | 100            | 1                                    | 91   | -8                                   | 100            | 1                                    | 89   | -11                                  | 100            | 1                                    | 93   | -6                                   |
| 74           | 95             | 1                                    | 97   | 2                                    | 95             | 1                                    | 96   | 1                                    | 95             | 1                                    | 96   | 1                                    |
| 75           | 100            | 0                                    | 100  | 0                                    | 100            | 0                                    | 100  | 0                                    | 100            | 0                                    | 100  | 0                                    |
| 76           | 100            | 0                                    | 100  | 0                                    | 100            | 0                                    | 100  | 0                                    | 100            | 0                                    | 100  | 0                                    |

| node<br>index<br># | Asp to Glu |                                    |      |                                    | Gln to Asn |                                    |      |                                    | Ile to Ala |                                 |      |                                 | Phe to Tyr |                                 |      |                                 | Val to Ala |                                 |      |                                 |
|--------------------|------------|------------------------------------|------|------------------------------------|------------|------------------------------------|------|------------------------------------|------------|---------------------------------|------|---------------------------------|------------|---------------------------------|------|---------------------------------|------------|---------------------------------|------|---------------------------------|
|                    | degen<br>1 | Δ<br>(Asp to<br>Glu -<br>standard) | 20AA | Δ<br>(Asp to<br>Glu -<br>standard) | degen<br>1 | Δ<br>(Gln to<br>Asn -<br>standard) | 20AA | Δ<br>(Gln to<br>Asn -<br>standard) | degen<br>1 | Δ<br>(Ile to Ala<br>- standard) | 20AA | Δ<br>(Ile to Ala<br>- standard) | degen<br>1 | Δ<br>(Phe to Tyr<br>- standard) | 20AA | Δ<br>(Phe to Tyr<br>- standard) | degen<br>1 | Δ<br>(Val to Ala<br>- standard) | 20AA | Δ<br>(Val to Ala<br>- standard) |
| 32                 | 90         | -2                                 | 62   | -2                                 | 95         | 3                                  | 68   | 4                                  | 97         | 5                               | 69   | 5                               | 90         | -2                              | 58   | -6                              | 96         | 4                               | 53   | -12                             |
| 40                 | 88         | -5                                 | 18   | -2                                 | 95         | 2                                  | 19   | -1                                 | 90         | -3                              | 20   | 1                               | 95         | 2                               | 17   | -2                              | 92         | -1                              | 20   | 0                               |
| 41                 | 74         | -12                                | 17   | -7                                 | 92         | 6                                  | 19   | -4                                 | 80         | -6                              | 17   | -6                              | 85         | -1                              | 18   | -5                              | 71         | -15                             | 31   | 7                               |
| 47                 | 100        | 0                                  | 59   | 7                                  | 100        | 0                                  | 35   | -17                                | 100        | 0                               | 41   | -11                             | 100        | 0                               | 47   | -5                              | 100        | 0                               | 50   | -2                              |
| 57                 | 97         | 3                                  | 13   | -3                                 | 91         | -3                                 | 11   | -5                                 | 94         | 0                               | 10   | -6                              | 92         | -2                              | 12   | -4                              | 95         | 1                               | 26   | 10                              |
| 58                 | 96         | 3                                  | 52   | -3                                 | 92         | -1                                 | 47   | -8                                 | 95         | 2                               | 49   | -6                              | 91         | -2                              | 45   | -10                             | 90         | -3                              | 37   | -18                             |
| 1                  | 100        | 0                                  | 100  | 0                                  | 100        | 0                                  | 100  | 0                                  | 100        | 0                               | 100  | 0                               | 100        | 0                               | 100  | 0                               | 100        | 0                               | 100  | 0                               |
| 2                  | 100        | 0                                  | 100  | 0                                  | 100        | 0                                  | 100  | 0                                  | 100        | 0                               | 100  | 0                               | 100        | 0                               | 100  | 0                               | 100        | 0                               | 100  | 0                               |
| 3                  | 100        | 0                                  | 100  | 0                                  | 100        | 0                                  | 100  | 0                                  | 100        | 0                               | 100  | 0                               | 100        | 0                               | 100  | 0                               | 100        | 0                               | 100  | 0                               |
| 4                  | 100        | 0                                  | 100  | 0                                  | 100        | 0                                  | 100  | 0                                  | 100        | 0                               | 100  | 0                               | 100        | 0                               | 100  | 0                               | 100        | 0                               | 100  | 0                               |
| 5                  | 100        | 0                                  | 100  | 0                                  | 100        | 0                                  | 100  | 0                                  | 100        | 0                               | 100  | 0                               | 100        | 0                               | 100  | 0                               | 100        | 0                               | 100  | 0                               |
| 6                  | 94         | 1                                  | 96   | 4                                  | 95         | 2                                  | 97   | 5                                  | 96         | 3                               | 96   | 4                               | 95         | 2                               | 94   | 2                               | 95         | 2                               | 94   | 1                               |
| 8                  | 99         | 0                                  | 88   | -1                                 | 99         | 0                                  | 92   | 3                                  | 99         | 0                               | 85   | -5                              | 100        | 1                               | 93   | 3                               | 95         | -4                              | 64   | -25                             |
| 9                  | 99         | 1                                  | 98   | 1                                  | 98         | 0                                  | 96   | 0                                  | 100        | 2                               | 96   | -1                              | 98         | 0                               | 97   | 0                               | 95         | -3                              | 88   | -9                              |
| 12                 | 100        | 0                                  | 100  | 0                                  | 100        | 0                                  | 100  | 0                                  | 100        | 0                               | 100  | 0                               | 100        | 0                               | 100  | 0                               | 100        | 0                               | 100  | 0                               |
| 13                 | 100        | 0                                  | 100  | 0                                  | 100        | 0                                  | 100  | 0                                  | 100        | 0                               | 100  | 0                               | 100        | 0                               | 100  | 0                               | 100        | 0                               | 100  | 0                               |
| 14                 | 61         | -7                                 | 10   | -7                                 | 65         | -3                                 | 29   | 12                                 | 84         | 16                              | 25   | 8                               | 53         | -15                             | 11   | -6                              | 82         | 14                              | 28   | 11                              |
| 15                 | 64         | -1                                 | 77   | 6                                  | 71         | 6                                  | 64   | -7                                 | 55         | -10                             | 58   | -13                             | 64         | -1                              | 79   | 8                               | 59         | -6                              | 81   | 10                              |
| 16                 | 100        | 0                                  | 100  | 0                                  | 100        | 0                                  | 100  | 0                                  | 100        | 0                               | 100  | 0                               | 100        | 0                               | 100  | 0                               | 100        | 0                               | 100  | 0                               |
| 17                 | 99         | 0                                  | 96   | -2                                 | 99         | 0                                  | 98   | 0                                  | 99         | 0                               | 97   | -1                              | 99         | 0                               | 98   | 1                               | 99         | 0                               | 93   | -4                              |
| 18                 | 100        | 0                                  | 96   | -2                                 | 100        | 0                                  | 96   | -2                                 | 100        | 0                               | 99   | 1                               | 100        | 0                               | 96   | -2                              | 100        | 0                               | 97   | -1                              |
| 19                 | 100        | 0                                  | 100  | 1                                  | 100        | 0                                  | 100  | 0                                  | 100        | 0                               | 99   | 0                               | 100        | 0                               | 100  | 1                               | 99         | -1                              | 99   | -1                              |
| 20                 | 99         | 0                                  | 98   | 0                                  | 98         | -1                                 | 97   | -2                                 | 100        | 1                               | 99   | 1                               | 100        | 1                               | 99   | 1                               | 99         | 0                               | 99   | 0                               |
| 21                 | 100        | 0                                  | 100  | 0                                  | 100        | 0                                  | 100  | 0                                  | 100        | 0                               | 100  | 0                               | 100        | 0                               | 100  | 0                               | 100        | 0                               | 100  | 0                               |
| 22                 | 100        | 0                                  | 100  | 0                                  | 100        | 0                                  | 100  | 0                                  | 100        | 0                               | 100  | 0                               | 100        | 0                               | 100  | 0                               | 100        | 0                               | 100  | 0                               |
| 23                 | 93         | 0                                  | 92   | 0                                  | 89         | -4                                 | 88   | -4                                 | 99         | 6                               | 84   | -8                              | 92         | -1                              | 90   | -2                              | 93         | 0                               | 88   | -4                              |
| 24                 | 100        | 1                                  | 96   | -1                                 | 99         | 0                                  | 99   | 2                                  | 99         | 0                               | 98   | 1                               | 100        | 1                               | 98   | 1                               | 100        | 1                               | 98   | 1                               |
| 27                 | 99         | 0                                  | 95   | -1                                 | 99         | 0                                  | 99   | 3                                  | 100        | 1                               | 99   | 3                               | 100        | 1                               | 96   | 0                               | 100        | 1                               | 97   | 1                               |
| 28                 | 100        | 0                                  | 100  | 0                                  | 100        | 0                                  | 100  | 0                                  | 100        | 0                               | 100  | 0                               | 100        | 0                               | 100  | 0                               | 100        | 0                               | 100  | 0                               |
| 32                 | 90         | -2                                 | 62   | -2                                 | 95         | 3                                  | 68   | 4                                  | 97         | 5                               | 69   | 5                               | 90         | -2                              | 58   | -6                              | 96         | 4                               | 53   | -12                             |
| 33                 | 100        | 0                                  | 100  | 0                                  | 100        | 0                                  | 100  | 0                                  | 100        | 0                               | 100  | 0                               | 100        | 0                               | 100  | 0                               | 100        | 0                               | 100  | 0                               |
| 34                 | 100        | 0                                  | 100  | 0                                  | 100        | 0                                  | 100  | 0                                  | 100        | 0                               | 100  | 0                               | 100        | 0                               | 100  | 0                               | 100        | 0                               | 100  | 0                               |
| 35                 | 98         | -2                                 | 98   | 0                                  | 98         | -2                                 | 99   | 1                                  | 100        | 0                               | 98   | 0                               | 99         | -1                              | 99   | 1                               | 100        | 0                               | 95   | -3                              |
| 37                 | 100        | 0                                  | 100  | 0                                  | 100        | 0                                  | 100  | 0                                  | 100        | 0                               | 100  | 0                               | 100        | 0                               | 100  | 0                               | 100        | 0                               | 100  | 0                               |
| 39                 | 100        | 0                                  | 100  | 0                                  | 100        | 0                                  | 100  | 0                                  | 100        | 0                               | 100  | 0                               | 100        | 0                               | 100  | 0                               | 100        | 0                               | 100  | 0                               |
| 40                 | 88         | -5                                 | 18   | -2                                 | 95         | 2                                  | 19   | -1                                 | 90         | -3                              | 20   | 1                               | 95         | 2                               | 17   | -2                              | 92         | -1                              | 20   | 0                               |
| 41                 | 74         | -12                                | 17   | -7                                 | 92         | 6                                  | 19   | -4                                 | 80         | -6                              | 17   | -6                              | 85         | -1                              | 18   | -5                              | 71         | -15                             | 31   | 7                               |
| 42                 | 100        | 0                                  | 100  | 0                                  | 100        | 0                                  | 100  | 0                                  | 100        | 0                               | 100  | 0                               | 100        | 0                               | 100  | 0                               | 100        | 0                               | 100  | 0                               |
| 43                 | 100        | 0                                  | 100  | 0                                  | 100        | 0                                  | 100  | 0                                  | 100        | 0                               | 100  | 0                               | 100        | 0                               | 100  | 0                               | 100        | 0                               | 100  | 0                               |
| 44                 | 100        | 0                                  | 100  | 0                                  | 100        | 0                                  | 100  | 0                                  | 100        | 0                               | 100  | 0                               | 100        | 0                               | 100  | 0                               | 100        | 0                               | 100  | 0                               |
| 45                 | 100        | 0                                  | 100  | 0                                  | 100        | 0                                  | 100  | 0                                  | 100        | 0                               | 100  | 0                               | 100        | 0                               | 100  | 0                               | 100        | 0                               | 98   | -2                              |
| 46                 | 100        | 0                                  | 100  | 0                                  | 100        | 0                                  | 100  | 0                                  | 100        | 0                               | 100  | 0                               | 100        | 0                               | 100  | 0                               | 100        | 0                               | 100  | 0                               |
| 47                 | 100        | 0                                  | 59   | 7                                  | 100        | 0                                  | 35   | -17                                | 100        | 0                               | 41   | -11                             | 100        | 0                               | 47   | -5                              | 100        | 0                               | 50   | -2                              |
| 48                 | 100        | 0                                  | 100  | 0                                  | 100        | 0                                  | 100  | 0                                  | 100        | 0                               | 100  | 0                               | 100        | 0                               | 100  | 0                               | 100        | 0                               | 100  | 0                               |
| 49                 | 100        | 0                                  | 100  | 0                                  | 100        | 0                                  | 100  | 0                                  | 100        | 0                               | 100  | 0                               | 100        | 0                               | 100  | 0                               | 100        | 0                               | 100  | 0                               |
| 50                 | 88         | 4                                  | 96   | -3                                 | 89         | 5                                  | 98   | -1                                 | 88         | 4                               | 97   | -1                              | 77         | -7                              | 97   | -2                              | 78         | -6                              | 97   | -2                              |
| 51                 | 100        | 0                                  | 100  | 0                                  | 100        | 0                                  | 100  | 0                                  | 100        | 0                               | 100  | 0                               | 100        | 0                               | 100  | 0                               | 100        | 0                               | 100  | 0                               |
| 52                 | 100        | 0                                  | 100  | 0                                  | 100        | 0                                  | 100  | 0                                  | 100        | 0                               | 100  | 0                               | 100        | 0                               | 100  | 0                               | 100        | 0                               | 100  | 0                               |
| 53                 | 77         | -10                                | 63   | -24                                | 90         | 3                                  | 86   | -1                                 | 85         | -2                              | 85   | -2                              | 81         | -6                              | 81   | -6                              | 92         | 5                               | 92   | 5                               |
| 54                 | 100        | 0                                  | 100  | 0                                  | 100        | 0                                  | 100  | 0                                  | 100        | 0                               | 100  | 0                               | 100        | 0                               | 100  | 0                               | 100        | 0                               | 100  | 0                               |
| 55                 | 100        | 0                                  | 100  | 0                                  | 100        | 0                                  | 100  | 0                                  | 100        | 0                               | 100  | 0                               | 100        | 0                               | 100  | 0                               | 100        | 0                               | 100  | 0                               |
| 56                 | 97         | 0                                  | 96   | 0                                  | 97         | 0                                  | 97   | 0                                  | 99         | 2                               | 96   | 0                               | 95         | -2                              | 93   | -4                              | 95         | -2                              | 91   | -5                              |
| 57                 | 97         | 3                                  | 13   | -3                                 | 91         | -3                                 | 11   | -5                                 | 94         | 0                               | 10   | -6                              | 92         | -2                              | 12   | -4                              | 95         | 1                               | 26   | 10                              |
| 58                 | 96         | 3                                  | 52   | -3                                 | 92         | -1                                 | 47   | -8                                 | 95         | 2                               | 49   | -6                              | 91         | -2                              | 45   | -10                             | 90         | -3                              | 37   | -18                             |
| 59                 | 100        | 0                                  | 100  | 0                                  | 100        | 0                                  | 99   | 0                                  | 99         | -1                              | 100  | 0                               | 100        | 0                               | 100  | 0                               | 99         | -1                              | 99   | -1                              |
| 60                 | 78         | -8                                 | 86   | 1                                  | 64         | -22                                | 83   | -2                                 | 79         | -7                              | 82   | -3                              | 77         | -9                              | 85   | 0                               | 69         | -17                             | 81   | -4                              |
| 61                 | 100        | 0                                  | 100  | 0                                  | 100        | 0                                  | 100  | 0                                  | 100        | 0                               | 100  | 0                               | 100        | 0                               | 100  | 0                               | 100        | 0                               | 100  | 0                               |
| 62                 | 100        | 0                                  | 100  | 0                                  | 100        | 0                                  | 100  | 0                                  | 100        | 0                               | 100  | 0                               | 100        | 0                               | 100  | 0                               | 100        | 0                               | 100  | 0                               |
| 63                 | 98         | 0                                  | 97   | 1                                  | 95         | -3                                 | 96   | -1                                 | 98         | 0                               | 95   | -2                              | 90         | -8                              | 88   | -9                              | 99         | 1                               | 97   | 0                               |
| 64                 | 100        | 0                                  | 100  | 0                                  | 100        | 0                                  | 100  | 0                                  | 100        | 0                               | 100  | 0                               | 100        | 0                               | 100  | 0                               | 100        | 0                               | 100  | 0                               |
| 65                 | 100        | 0                                  | 100  | 0                                  | 100        | 0                                  | 100  | 0                                  | 100        | 0                               | 100  | 0                               | 100        | 0                               | 100  | 0                               | 100        | 0                               | 100  | 0                               |
| 66                 | 100        | 0                                  | 100  | 0                                  | 100        | 0                                  | 100  | 0                                  | 100        | 0                               | 100  | 0                               | 100        | 0                               | 100  | 0                               | 100        | 0                               | 100  | 0                               |
| 67                 | 100        | 0                                  | 100  | 0                                  | 100        | 0                                  | 100  | 0                                  | 100        | 0                               | 100  | 0                               | 100        | 0                               | 100  | 0                               | 100        | 0                               | 100  | 0                               |
| 68                 | 99         | 0                                  | 99   | 0                                  | 99         | 0                                  | 98   | -1                                 | 91         | -8                              | 95   | -5                              | 98         | -1                              | 99   | -1                              | 95         | -4                              | 97   | -3                              |
| 69                 | 71         | 2                                  | 89   | 0                                  | 60         | -9                                 | 87   | -1                                 | 78         | 9                               | 84   | -4                              | 73         | 4                               | 90   | 1                               | 75         | 6                               | 86   | -2                              |
| 70                 | 100        | 0                                  | 100  | 0                                  | 100        | 0                                  | 100  | 0                                  | 100        | 0                               | 100  | 0                               | 100        | 0                               | 100  | 0                               | 100        | 0                               | 100  | 0                               |
| 71                 | 100        | 0                                  | 100  | 0                                  | 100        | 0                                  | 100  | 0                                  | 100        | 0                               | 100  | 0                               | 100        | 0                               | 100  | 0                               | 100        | 0                               | 100  | 0                               |
| 72                 | 96         | -1                                 | 94   | -2                                 | 95         | -2                                 | 97   | 2                                  | 91         | -6                              | 87   | -9                              | 94         | -3                              | 93   | -3                              | 94         | -3                              | 94   | -2                              |
| 73                 | 99         | 0                                  | 100  | 0                                  | 99         | 0                                  | 100  | 0                                  | 100        | 1                               | 100  | 0                               | 99         | 0                               | 99   | -1                              | 100        | 1                               | 100  | 0                               |
| 74                 | 96         | 2                                  | 98   | 3                                  | 98         | 4                                  | 95   | 0                                  | 98         | 4                               | 93   | -2                              | 92         | -2                              | 91   | -4                              | 98         | 4                               | 97   | 2                               |
| 75                 | 100        | 0                                  | 100  | 0                                  | 100        | 0                                  | 100  | 0                                  | 100        | 0                               | 100  | 0                               | 100        | 0                               | 100  | 0                               | 100        | 0                               | 100  | 0                               |
| 76                 | 100        | 0                                  | 100  | 0                                  | 100        | 0                                  | 100  | 0                                  | 100        | 0                               | 100  | 0                               | 100        | 0                               | 100  | 0                               | 100        | 0                               | 100  | 0                               |

| node<br>index<br># | no Phe     |                             |      |                             | no Trp     |                             |      |                             | no Tyr     |                             |      |                             |
|--------------------|------------|-----------------------------|------|-----------------------------|------------|-----------------------------|------|-----------------------------|------------|-----------------------------|------|-----------------------------|
|                    | degen<br>1 | Δ<br>(no Phe -<br>standard) | 20AA | Δ<br>(no Phe -<br>standard) | degen<br>1 | Δ<br>(no Trp -<br>standard) | 20AA | Δ<br>(no Trp -<br>standard) | degen<br>1 | Δ<br>(no Tyr -<br>standard) | 20AA | Δ<br>(no Tyr -<br>standard) |
| 32                 | 92         | 0                           | 60   | -4                          | 90         | -2                          | 66   | 2                           | 90         | -2                          | 60   | -4                          |
| 40                 | 89         | -4                          | 19   | 0                           | 94         | 1                           | 26   | 6                           | 92         | -1                          | 17   | -3                          |
| 41                 | 83         | -3                          | 20   | -4                          | 89         | 3                           | 31   | 7                           | 86         | 0                           | 18   | -6                          |
| 47                 | 100        | 0                           | 56   | 4                           | 100        | 0                           | 63   | 11                          | 100        | 0                           | 47   | -5                          |
| 57                 | 94         | 0                           | 11   | -5                          | 95         | 1                           | 18   | 2                           | 95         | 1                           | 10   | -6                          |
| 58                 | 92         | -1                          | 53   | -2                          | 93         | 0                           | 56   | 1                           | 92         | -1                          | 58   | 3                           |
| 1                  | 100        | 0                           | 100  | 0                           | 100        | 0                           | 100  | 0                           | 100        | 0                           | 100  | 0                           |
| 2                  | 100        | 0                           | 100  | 0                           | 100        | 0                           | 100  | 0                           | 100        | 0                           | 100  | 0                           |
| 3                  | 100        | 0                           | 100  | 0                           | 100        | 0                           | 100  | 0                           | 100        | 0                           | 100  | 0                           |
| 4                  | 100        | 0                           | 100  | 0                           | 100        | 0                           | 100  | 0                           | 100        | 0                           | 100  | 0                           |
| 5                  | 100        | 0                           | 100  | 0                           | 100        | 0                           | 100  | 0                           | 100        | 0                           | 100  | 0                           |
| 6                  | 92         | -1                          | 93   | 1                           | 94         | 1                           | 95   | 2                           | 84         | -9                          | 89   | -4                          |
| 8                  | 100        | 1                           | 96   | 7                           | 99         | 0                           | 92   | 2                           | 99         | 0                           | 88   | -2                          |
| 9                  | 97         | -1                          | 96   | -1                          | 98         | 0                           | 98   | 1                           | 98         | 0                           | 95   | -1                          |
| 12                 | 100        | 0                           | 100  | 0                           | 100        | 0                           | 100  | 0                           | 100        | 0                           | 100  | 0                           |
| 13                 | 100        | 0                           | 100  | 0                           | 100        | 0                           | 100  | 0                           | 100        | 0                           | 100  | 0                           |
| 14                 | 61         | -7                          | 17   | 0                           | 70         | 2                           | 17   | 0                           | 52         | -16                         | 12   | -5                          |
| 15                 | 68         | 3                           | 74   | 3                           | 67         | 2                           | 75   | 4                           | 68         | 3                           | 79   | 8                           |
| 16                 | 100        | 0                           | 100  | 0                           | 100        | 0                           | 100  | 0                           | 100        | 0                           | 100  | 0                           |
| 17                 | 99         | 0                           | 98   | 0                           | 100        | 1                           | 98   | 1                           | 99         | 0                           | 98   | 0                           |
| 18                 | 100        | 0                           | 96   | -2                          | 100        | 0                           | 97   | -1                          | 100        | 0                           | 98   | 0                           |
| 19                 | 100        | 0                           | 98   | -1                          | 100        | 0                           | 100  | 0                           | 100        | 0                           | 99   | 0                           |
| 20                 | 98         | -1                          | 98   | -1                          | 99         | 0                           | 98   | 0                           | 97         | -2                          | 97   | -1                          |
| 21                 | 100        | 0                           | 100  | 0                           | 100        | 0                           | 100  | 0                           | 100        | 0                           | 100  | 0                           |
| 22                 | 100        | 0                           | 100  | 0                           | 100        | 0                           | 100  | 0                           | 100        | 0                           | 100  | 0                           |
| 23                 | 93         | 0                           | 90   | -2                          | 92         | -1                          | 92   | 0                           | 93         | 0                           | 91   | -1                          |
| 24                 | 100        | 1                           | 97   | 0                           | 100        | 1                           | 98   | 1                           | 100        | 1                           | 97   | 0                           |
| 27                 | 98         | -1                          | 94   | -3                          | 99         | 0                           | 97   | 1                           | 98         | -1                          | 96   | -1                          |
| 28                 | 100        | 0                           | 100  | 0                           | 100        | 0                           | 100  | 0                           | 100        | 0                           | 100  | 0                           |
| 32                 | 92         | 0                           | 60   | -4                          | 90         | -2                          | 66   | 2                           | 90         | -2                          | 60   | -4                          |
| 33                 | 100        | 0                           | 100  | 0                           | 100        | 0                           | 100  | 0                           | 100        | 0                           | 100  | 0                           |
| 34                 | 100        | 0                           | 100  | 0                           | 100        | 0                           | 100  | 0                           | 100        | 0                           | 100  | 0                           |
| 35                 | 98         | -2                          | 98   | 0                           | 99         | -1                          | 99   | 1                           | 99         | -1                          | 98   | 0                           |
| 37                 | 100        | 0                           | 100  | 0                           | 100        | 0                           | 100  | 0                           | 100        | 0                           | 100  | 0                           |
| 39                 | 100        | 0                           | 100  | 0                           | 100        | 0                           | 100  | 0                           | 100        | 0                           | 100  | 0                           |
| 40                 | 89         | -4                          | 19   | 0                           | 94         | 1                           | 26   | 6                           | 92         | -1                          | 17   | -3                          |
| 41                 | 83         | -3                          | 20   | -4                          | 89         | 3                           | 31   | 7                           | 86         | 0                           | 18   | -6                          |
| 42                 | 100        | 0                           | 100  | 0                           | 100        | 0                           | 100  | 0                           | 100        | 0                           | 100  | 0                           |
| 43                 | 100        | 0                           | 100  | 0                           | 100        | 0                           | 100  | 0                           | 100        | 0                           | 100  | 0                           |
| 44                 | 100        | 0                           | 100  | 0                           | 100        | 0                           | 100  | 0                           | 100        | 0                           | 100  | 0                           |
| 45                 | 100        | 0                           | 100  | 0                           | 100        | 0                           | 100  | 0                           | 100        | 0                           | 100  | 0                           |
| 46                 | 100        | 0                           | 100  | 0                           | 100        | 0                           | 100  | 0                           | 100        | 0                           | 100  | 0                           |
| 47                 | 100        | 0                           | 56   | 4                           | 100        | 0                           | 63   | 11                          | 100        | 0                           | 47   | -5                          |
| 48                 | 100        | 0                           | 100  | 0                           | 100        | 0                           | 100  | 0                           | 100        | 0                           | 100  | 0                           |
| 49                 | 100        | 0                           | 100  | 0                           | 100        | 0                           | 100  | 0                           | 100        | 0                           | 100  | 0                           |
| 50                 | 73         | -11                         | 96   | -3                          | 80         | -4                          | 98   | -1                          | 72         | -12                         | 96   | -3                          |
| 51                 | 100        | 0                           | 100  | 0                           | 100        | 0                           | 100  | 0                           | 100        | 0                           | 100  | 0                           |
| 52                 | 100        | 0                           | 100  | 0                           | 100        | 0                           | 100  | 0                           | 100        | 0                           | 100  | 0                           |
| 53                 | 83         | -4                          | 81   | -7                          | 83         | -4                          | 84   | -4                          | 86         | -1                          | 84   | -3                          |
| 54                 | 100        | 0                           | 100  | 0                           | 100        | 0                           | 100  | 0                           | 100        | 0                           | 100  | 0                           |
| 55                 | 100        | 0                           | 100  | 0                           | 100        | 0                           | 100  | 0                           | 100        | 0                           | 100  | 0                           |
| 56                 | 91         | -6                          | 88   | -9                          | 95         | -2                          | 94   | -2                          | 95         | -2                          | 93   | -3                          |
| 57                 | 94         | 0                           | 11   | -5                          | 95         | 1                           | 18   | 2                           | 95         | 1                           | 10   | -6                          |
| 58                 | 92         | -1                          | 53   | -2                          | 93         | 0                           | 56   | 1                           | 92         | -1                          | 58   | 3                           |
| 59                 | 100        | 0                           | 100  | 0                           | 100        | 0                           | 100  | 0                           | 100        | 0                           | 100  | 0                           |
| 60                 | 86         | 0                           | 91   | 6                           | 85         | -1                          | 87   | 2                           | 87         | 1                           | 93   | 8                           |
| 61                 | 100        | 0                           | 100  | 0                           | 100        | 0                           | 100  | 0                           | 100        | 0                           | 100  | 0                           |
| 62                 | 100        | 0                           | 100  | 0                           | 100        | 0                           | 100  | 0                           | 100        | 0                           | 100  | 0                           |
| 63                 | 90         | -8                          | 90   | -6                          | 97         | -1                          | 94   | -2                          | 94         | -4                          | 85   | -11                         |
| 64                 | 100        | 0                           | 100  | 0                           | 100        | 0                           | 100  | 0                           | 100        | 0                           | 100  | 0                           |
| 65                 | 100        | 0                           | 100  | 0                           | 100        | 0                           | 100  | 0                           | 100        | 0                           | 100  | 0                           |
| 66                 | 100        | 0                           | 100  | 0                           | 100        | 0                           | 100  | 0                           | 100        | 0                           | 100  | 0                           |
| 67                 | 100        | 0                           | 100  | 0                           | 100        | 0                           | 100  | 0                           | 100        | 0                           | 100  | 0                           |
| 68                 | 97         | -2                          | 98   | -2                          | 98         | -1                          | 99   | 0                           | 99         | 0                           | 99   | -1                          |
| 69                 | 69         | 0                           | 90   | 2                           | 71         | 2                           | 88   | -1                          | 62         | -7                          | 87   | -1                          |
| 70                 | 100        | 0                           | 100  | 0                           | 100        | 0                           | 100  | 0                           | 100        | 0                           | 100  | 0                           |
| 71                 | 100        | 0                           | 100  | 0                           | 100        | 0                           | 100  | 0                           | 100        | 0                           | 100  | 0                           |
| 72                 | 96         | -1                          | 95   | 0                           | 97         | 0                           | 95   | -1                          | 94         | -3                          | 95   | 0                           |
| 73                 | 99         | 0                           | 99   | 0                           | 99         | 0                           | 100  | 0                           | 98         | -1                          | 99   | -1                          |
| 74                 | 91         | -3                          | 93   | -2                          | 94         | 0                           | 95   | 0                           | 86         | -8                          | 88   | -7                          |
| 75                 | 100        | 0                           | 100  | 0                           | 100        | 0                           | 100  | 0                           | 100        | 0                           | 100  | 0                           |
| 76                 | 100        | 0                           | 100  | 0                           | 100        | 0                           | 100  | 0                           | 100        | 0                           | 100  | 0                           |
