# Supplementary material for: Resolving Discrepancy between Nucleotides and Amino Acids in Deep-Level Arthropod Phylogenomics: Differentiating Serine Codons in 21-Amino-Acid Models
Source: PLoS One. 2012 Nov 20;7(11):e47450. doi: 10.1371/journal.pone.0047450 (PMC3502419; doi:10.1371/journal.pone.0047450)
Supplement: Table S4 — Individual substitution rates of the ECM model categorized by their effect on amino acids: synonymous, synonymous SER (S/Z) and nonsynonymous. (PDF) [file pone.0047450.s011.pdf]

**Table S4:** Individual substitution rates of the ECM model categorized by their effect on amino acids: synonymous, synonymous SER (S/Z) and nonsynonymous.

| codon (AA) substitution | ECM rate             |                      |                    |
|-------------------------|----------------------|----------------------|--------------------|
|                         | synonymous           | synonymous SER (S/Z) | nonsynonymous      |
| <b>AVERAGE</b>          | <b>17.8281698734</b> | <b>5.094309375</b>   | <b>0.480768556</b> |
| GGG (G) / CTA (L)       |                      |                      | 0.000000           |
| AAA (K) / CTG (L)       |                      |                      | 0.000035           |
| GCC (A) / ATT (I)       |                      |                      | 0.000040           |
| GAT (D) / ATC (I)       |                      |                      | 0.000042           |
| GCC (A) / AAT (N)       |                      |                      | 0.000045           |
| AGT (Z) / TTC (F)       |                      |                      | 0.000047           |
| ATA (I) / CAG (Q)       |                      |                      | 0.000048           |
| GGC (G) / TAT (Y)       |                      |                      | 0.000058           |
| GGA (G) / CTC (L)       |                      |                      | 0.000060           |
| GAC (D) / TTA (L)       |                      |                      | 0.000062           |
| CGC (R) / TTG (L)       |                      |                      | 0.000064           |
| GGG (G) / CTT (L)       |                      |                      | 0.000066           |
| GCA (A) / CGC (R)       |                      |                      | 0.000068           |
| GGA (G) / CTG (L)       |                      |                      | 0.000070           |
| GGG (G) / ATA (I)       |                      |                      | 0.000078           |
| GGG (G) / ATT (I)       |                      |                      | 0.000081           |
| GTA (V) / CCG (P)       |                      |                      | 0.000082           |
| GGA (G) / ATC (I)       |                      |                      | 0.000084           |
| GGC (G) / TCT (S)       |                      |                      | 0.000085           |
| GGC (G) / CCA (P)       |                      |                      | 0.000090           |
| GGT (G) / CAC (H)       |                      |                      | 0.000091           |
| GCC (A) / TTT (F)       |                      |                      | 0.000093           |
| AAT (N) / TTC (F)       |                      |                      | 0.000094           |
| GGC (G) / CCT (P)       |                      |                      | 0.000096           |
| GTC (V) / AGT (Z)       |                      |                      | 0.000097           |
| GTG (V) / AGA (R)       |                      |                      | 0.000103           |
| AGT (Z) / CTG (L)       |                      |                      | 0.000105           |
| GGA (G) / ACC (T)       |                      |                      | 0.000112           |
| GTA (V) / TCG (S)       |                      |                      | 0.000115           |
| GTC (V) / TAT (Y)       |                      |                      | 0.000116           |
| ATC (I) / CGT (R)       |                      |                      | 0.000118           |
| GGG (G) / CTC (L)       |                      |                      | 0.000119           |
| GGT (G) / TAC (Y)       |                      |                      | 0.000120           |
| GCA (A) / CGG (R)       |                      |                      | 0.000123           |
| GCC (A) / CTT (L)       |                      |                      | 0.000132           |
| GAT (D) / TGC (C)       |                      |                      | 0.000135           |
| GAG (E) / CTA (L)       |                      |                      | 0.000136           |
| GAA (E) / CTG (L)       |                      |                      | 0.000140           |
| GGT (G) / TTC (F)       |                      |                      | 0.000141           |
| GTA (V) / CAG (Q)       |                      |                      | 0.000145           |
| CAC (H) / TGT (C)       |                      |                      | 0.000155           |
| GGT (G) / ATA (I)       |                      |                      | 0.000156           |

| codon (AA) substitution | synonymous | ECM rate             |               |
|-------------------------|------------|----------------------|---------------|
|                         |            | synonymous SER (S/Z) | nonsynonymous |
| GAC (D) / ACT (T)       |            |                      | 0.000158      |
| GGA (G) / CCG (P)       |            |                      | 0.000164      |
| GGT (G) / CTG (L)       |            |                      | 0.000175      |
| AGT (Z) / TAC (Y)       |            |                      | 0.000180      |
| GTT (V) / TCC (S)       |            |                      | 0.000186      |
| GGA (G) / ACG (T)       |            |                      | 0.000187      |
| GGC (G) / TTG (L)       |            |                      | 0.000191      |
| GTA (V) / CCC (P)       |            |                      | 0.000192      |
| GTG (V) / AAA (K)       |            |                      | 0.000193      |
| GTC (V) / AGA (R)       |            |                      | 0.000205      |
| GTT (V) / AGC (Z)       |            |                      | 0.000219      |
| GCT (A) / TTC (F)       |            |                      | 0.000234      |
| GAC (D) / CGT (R)       |            |                      | 0.000236      |
| GTT (V) / CCG (P)       |            |                      | 0.000246      |
| AGG (R) / TTA (L)       |            |                      | 0.000247      |
| GCT (A) / ATC (I)       |            |                      | 0.000253      |
| GAC (D) / TCT (S)       |            |                      | 0.000254      |
| ACG (T) / CTT (L)       |            |                      | 0.000264      |
| CCT (P) / TGC (C)       |            |                      | 0.000270      |
| GGT (G) / CTA (L)       |            |                      | 0.000272      |
| GTA (V) / TCC (S)       |            |                      | 0.000279      |
| GGA (G) / ATT (I)       |            |                      | 0.000283      |
| GGT (G) / CCC (P)       |            |                      | 0.000288      |
| GGA (G) / CAG (Q)       |            |                      | 0.000289      |
| GGG (G) / ATC (I)       |            |                      | 0.000295      |
| CTT (L) / TAC (Y)       |            |                      | 0.000299      |
| ATC (I) / TGT (C)       |            |                      | 0.000311      |
| GGA (G) / CTT (L)       |            |                      | 0.000330      |
| ATC (I) / TCG (S)       |            |                      | 0.000344      |
| GCA (A) / CTG (L)       |            |                      | 0.000351      |
| GTA (V) / CGT (R)       |            |                      | 0.000353      |
| GCA (A) / CTC (L)       |            |                      | 0.000357      |
| GTT (V) / TAC (Y)       |            |                      | 0.000359      |
| GAT (D) / CGG (R)       |            |                      | 0.000368      |
| GGT (G) / ACG (T)       |            |                      | 0.000374      |
| GTC (V) / CAT (H)       |            |                      | 0.000375      |
| CCC (P) / TTG (L)       |            |                      | 0.000382      |
| GGA (G) / CCC (P)       |            |                      | 0.000384      |
| ATT (I) / TCA (S)       |            |                      | 0.000386      |
| GAC (D) / AGT (Z)       |            |                      | 0.000388      |
| ACC (T) / CTT (L)       |            |                      | 0.000396      |
| ATT (I) / TGC (C)       |            |                      | 0.000405      |
| ACG (T) / CTA (L)       |            |                      | 0.000408      |
| GAG (E) / AGA (R)       |            |                      | 0.000410      |
| GCC (A) / CGA (R)       |            |                      | 0.000416      |
| GCT (A) / CTC (L)       |            |                      | 0.000417      |
| GCT (A) / TAC (Y)       |            |                      | 0.000419      |
| ATA (I) / TCT (S)       |            |                      | 0.000424      |

| codon (AA) substitution | synonymous | ECM rate             |               |
|-------------------------|------------|----------------------|---------------|
|                         |            | synonymous SER (S/Z) | nonsynonymous |
| AGC (Z) / TTA (L)       |            |                      | 0.000432      |
| GGG (G) / ACC (T)       |            |                      | 0.000447      |
| ATC (I) / CCA (P)       |            |                      | 0.000448      |
| AGT (Z) / CAC (H)       |            |                      | 0.000453      |
| AAA (K) / TCG (S)       |            |                      | 0.000459      |
| GCC (A) / TGT (C)       |            |                      | 0.000466      |
| CAC (H) / TTT (F)       |            |                      | 0.000467      |
| ATC (I) / CAT (H)       |            |                      | 0.000469      |
| CCT (P) / TAC (Y)       |            |                      | 0.000479      |
| GCG (A) / AAA (K)       |            |                      | 0.000482      |
| GCC (A) / AGT (Z)       |            |                      | 0.000485      |
| GAT (D) / CTG (L)       |            |                      | 0.000491      |
| GTA (V) / AAG (K)       |            |                      | 0.000524      |
| GGT (G) / ACA (T)       |            |                      | 0.000534      |
| GTC (V) / CCA (P)       |            |                      | 0.000537      |
| GGG (G) / ACT (T)       |            |                      | 0.000553      |
| GAT (D) / ACC (T)       |            |                      | 0.000559      |
| GCC (A) / CAT (H)       |            |                      | 0.000562      |
| CGT (R) / TCA (S)       |            |                      | 0.000579      |
| GCA (A) / ATC (I)       |            |                      | 0.000589      |
| CAC (H) / TCT (S)       |            |                      | 0.000593      |
| ACG (T) / CTC (L)       |            |                      | 0.000595      |
| ACT (T) / TAC (Y)       |            |                      | 0.000599      |
| GGG (G) / ACA (T)       |            |                      | 0.000610      |
| GCG (A) / CGA (R)       |            |                      | 0.000624      |
| GTG (V) / AAT (N)       |            |                      | 0.000628      |
| GTA (V) / AGC (Z)       |            |                      | 0.000657      |
| CTT (L) / TGC (C)       |            |                      | 0.000674      |
| CTA (L) / TCT (S)       |            |                      | 0.000678      |
| AAG (K) / CTA (L)       |            |                      | 0.000679      |
| GTG (V) / CCA (P)       |            |                      | 0.000717      |
| GAC (D) / AGA (R)       |            |                      | 0.000718      |
| GGT (G) / TTA (L)       |            |                      | 0.000741      |
| GGA (G) / CGC (R)       |            |                      | 0.000753      |
| GAT (D) / CCC (P)       |            |                      | 0.000769      |
| GCT (A) / CTG (L)       |            |                      | 0.000772      |
| ACC (T) / TGT (C)       |            |                      | 0.000776      |
| GGC (G) / AGA (R)       |            |                      | 0.000821      |
| GTG (V) / CGA (R)       |            |                      | 0.000832      |
| GAG (E) / ACA (T)       |            |                      | 0.000838      |
| GGC (G) / CAT (H)       |            |                      | 0.000843      |
| ACA (T) / CTT (L)       |            |                      | 0.000857      |
| GAA (E) / CGG (R)       |            |                      | 0.000858      |
| GCG (A) / CTC (L)       |            |                      | 0.000893      |
| AAT (N) / TCC (S)       |            |                      | 0.000929      |
| AAC (N) / TGT (C)       |            |                      | 0.000932      |
| CGG (R) / TTT (F)       |            |                      | 0.000934      |
| AGG (R) / CTA (L)       |            |                      | 0.000951      |

| codon (AA) substitution | synonymous | ECM rate             |               |
|-------------------------|------------|----------------------|---------------|
|                         |            | synonymous SER (S/Z) | nonsynonymous |
| AGG (R) / CTC (L)       |            |                      | 0.000952      |
| AAC (N) / CCT (P)       |            |                      | 0.000959      |
| AAT (N) / CGG (R)       |            |                      | 0.000981      |
| CTG (L) / TCC (S)       |            |                      | 0.001022      |
| GTC (V) / ACT (T)       |            |                      | 0.001027      |
| GAG (E) / CGA (R)       |            |                      | 0.001040      |
| ACC (T) / CGT (R)       |            |                      | 0.001060      |
| GAG (E) / TCA (S)       |            |                      | 0.001061      |
| AGT (Z) / CCG (P)       |            |                      | 0.001066      |
| GGA (G) / TTG (L)       |            |                      | 0.001082      |
| GTC (V) / TGT (C)       |            |                      | 0.001087      |
| GGC (G) / AAT (N)       |            |                      | 0.001122      |
| ACC (T) / CAT (H)       |            |                      | 0.001125      |
| GTA (V) / CCT (P)       |            |                      | 0.001151      |
| GGG (G) / AAA (K)       |            |                      | 0.001158      |
| GCG (A) / CAA (Q)       |            |                      | 0.001165      |
| GAT (D) / ATA (I)       |            |                      | 0.001171      |
| CGT (R) / TCC (S)       |            |                      | 0.001208      |
| AGC (Z) / CCT (P)       |            |                      | 0.001247      |
| ATC (I) / CGA (R)       |            |                      | 0.001248      |
| GGG (G) / CCA (P)       |            |                      | 0.001254      |
| GTC (V) / TCG (S)       |            |                      | 0.001261      |
| ACA (T) / CAG (Q)       |            |                      | 0.001302      |
| GGT (G) / CCG (P)       |            |                      | 0.001312      |
| GCT (A) / AAC (N)       |            |                      | 0.001329      |
| GTA (V) / TCT (S)       |            |                      | 0.001356      |
| GTG (V) / AGT (Z)       |            |                      | 0.001358      |
| GAC (D) / CTA (L)       |            |                      | 0.001359      |
| CGT (R) / TAC (Y)       |            |                      | 0.001377      |
| GTG (V) / TCC (S)       |            |                      | 0.001394      |
| GTG (V) / CGT (R)       |            |                      | 0.001413      |
| GGG (G) / CCC (P)       |            |                      | 0.001441      |
| ACT (T) / TGC (C)       |            |                      | 0.001483      |
| CGA (R) / TTG (L)       |            |                      | 0.001527      |
| GCG (A) / CGT (R)       |            |                      | 0.001531      |
| GTG (V) / CCC (P)       |            |                      | 0.001537      |
| GGC (G) / GTA (V)       |            |                      | 0.001557      |
| GCC (A) / TTG (L)       |            |                      | 0.001654      |
| CGC (R) / CCA (P)       |            |                      | 0.001702      |
| AGA (R) / TTG (L)       |            |                      | 0.001718      |
| GGA (G) / TCG (S)       |            |                      | 0.001720      |
| GGA (G) / AAG (K)       |            |                      | 0.001760      |
| GCC (A) / AGG (R)       |            |                      | 0.001768      |
| GAG (E) / CCA (P)       |            |                      | 0.001791      |
| GCT (A) / ATA (I)       |            |                      | 0.001795      |
| GCT (A) / CGA (R)       |            |                      | 0.001871      |
| GGG (G) / CCT (P)       |            |                      | 0.001918      |
| GTC (V) / AAA (K)       |            |                      | 0.001930      |

| codon (AA) substitution | synonymous | ECM rate             |               |
|-------------------------|------------|----------------------|---------------|
|                         |            | synonymous SER (S/Z) | nonsynonymous |
| GGA (G) / TCC (S)       |            |                      | 0.001951      |
| GTA (V) / ACC (T)       |            |                      | 0.001957      |
| ATA (I) / CCT (P)       |            |                      | 0.002014      |
| AGA (R) / TCC (S)       |            |                      | 0.002044      |
| GGC (G) / GTT (V)       |            |                      | 0.002050      |
| GTA (V) / AGG (R)       |            |                      | 0.002062      |
| ACC (T) / CGA (R)       |            |                      | 0.002079      |
| CAG (Q) / TCA (S)       |            |                      | 0.002122      |
| CAT (H) / TCC (S)       |            |                      | 0.002137      |
| AAA (K) / CTC (L)       |            |                      | 0.002143      |
| CAC (H) / TTG (L)       |            |                      | 0.002163      |
| GAA (E) / TCG (S)       |            |                      | 0.002179      |
| GCA (A) / CAG (Q)       |            |                      | 0.002219      |
| GCA (A) / ATT (I)       |            |                      | 0.002262      |
| GTA (V) / AAC (N)       |            |                      | 0.002362      |
| GCA (A) / CTT (L)       |            |                      | 0.002374      |
| CGC (R) / CCT (P)       |            |                      | 0.002398      |
| GGA (G) / ACT (T)       |            |                      | 0.002449      |
| GGT (G) / CCA (P)       |            |                      | 0.002508      |
| GTC (V) / ACA (T)       |            |                      | 0.002515      |
| GTA (V) / ACG (T)       |            |                      | 0.002528      |
| ATT (I) / CCA (P)       |            |                      | 0.002597      |
| CTG (L) / TGT (C)       |            |                      | 0.002639      |
| GAA (E) / CTC (L)       |            |                      | 0.002679      |
| AAT (N) / CCG (P)       |            |                      | 0.002705      |
| AGC (Z) / CTA (L)       |            |                      | 0.002718      |
| CCA (P) / TGT (C)       |            |                      | 0.002795      |
| GGG (G) / TCT (S)       |            |                      | 0.002797      |
| GTA (V) / CAC (H)       |            |                      | 0.002808      |
| AAC (N) / TTA (L)       |            |                      | 0.002840      |
| ACG (T) / CAA (Q)       |            |                      | 0.002854      |
| GGC (G) / AAA (K)       |            |                      | 0.002863      |
| ACG (T) / CGA (R)       |            |                      | 0.002911      |
| GGG (G) / TCC (S)       |            |                      | 0.002974      |
| ACC (T) / TTG (L)       |            |                      | 0.002990      |
| GTT (V) / ACC (T)       |            |                      | 0.003020      |
| GGG (G) / CAA (Q)       |            |                      | 0.003029      |
| CGT (R) / TTG (L)       |            |                      | 0.003054      |
| ATC (I) / CGG (R)       |            |                      | 0.003064      |
| AAC (N) / CGT (R)       |            |                      | 0.003180      |
| CGA (R) / TCG (S)       |            |                      | 0.003211      |
| GTG (V) / CGC (R)       |            |                      | 0.003287      |
| GAG (E) / ATT (I)       |            |                      | 0.003312      |
| GAC (D) / ACA (T)       |            |                      | 0.003354      |
| GGG (G) / TCA (S)       |            |                      | 0.003376      |
| GGT (G) / CAG (Q)       |            |                      | 0.003377      |
| AAC (N) / TCT (S)       |            |                      | 0.003390      |
| GAA (E) / ACG (T)       |            |                      | 0.003464      |

| codon (AA) substitution | synonymous | ECM rate             |               |
|-------------------------|------------|----------------------|---------------|
|                         |            | synonymous SER (S/Z) | nonsynonymous |
| CCT (P) / TTG (L)       |            |                      | 0.003499      |
| GGA (G) / CCT (P)       |            |                      | 0.003549      |
| GTG (V) / ACT (T)       |            |                      | 0.003635      |
| GAA (E) / TGC (C)       |            |                      | 0.003641      |
| GAC (D) / CCA (P)       |            |                      | 0.003672      |
| CGG (R) / TAT (Y)       |            |                      | 0.003713      |
| GAT (D) / TCC (S)       |            |                      | 0.003717      |
| GTT (V) / CGA (R)       |            |                      | 0.003743      |
| GCG (A) / AAT (N)       |            |                      | 0.003771      |
| AGG (R) / CAA (Q)       |            |                      | 0.003786      |
| ATT (I) / CAG (Q)       |            |                      | 0.003859      |
| GGT (G) / TTG (L)       |            |                      | 0.003881      |
| CCG (P) / TTT (F)       |            |                      | 0.004063      |
| GCT (A) / CTA (L)       |            |                      | 0.004077      |
| CGA (R) / TCC (S)       |            |                      | 0.004089      |
| GAC (D) / GTT (V)       |            |                      | 0.004101      |
| GTG (V) / AGC (Z)       |            |                      | 0.004160      |
| CCG (P) / TAT (Y)       |            |                      | 0.004177      |
| GAG (E) / CTT (L)       |            |                      | 0.004220      |
| GTT (V) / TGC (C)       |            |                      | 0.004316      |
| ACT (T) / CTA (L)       |            |                      | 0.004348      |
| GCA (A) / AAG (K)       |            |                      | 0.004382      |
| GAA (E) / AGG (R)       |            |                      | 0.004420      |
| AAG (K) / TCA (S)       |            |                      | 0.004438      |
| CCG (P) / TGC (C)       |            |                      | 0.004585      |
| ACG (T) / CGT (R)       |            |                      | 0.004593      |
| GCG (A) / ATC (I)       |            |                      | 0.004629      |
| GGT (G) / CGC (R)       |            |                      | 0.004656      |
| AGA (R) / CTT (L)       |            |                      | 0.004747      |
| CTG (L) / TAT (Y)       |            |                      | 0.004815      |
| CGG (R) / TCC (S)       |            |                      | 0.004832      |
| GTT (V) / ACG (T)       |            |                      | 0.004868      |
| AAA (K) / TTG (L)       |            |                      | 0.004963      |
| GGA (G) / CAC (H)       |            |                      | 0.004982      |
| GTC (V) / CGG (R)       |            |                      | 0.005026      |
| AGC (Z) / CAT (H)       |            |                      | 0.005060      |
| AGC (Z) / CCA (P)       |            |                      | 0.005195      |
| GCT (A) / AGC (Z)       |            |                      | 0.005328      |
| GAA (E) / CCG (P)       |            |                      | 0.005410      |
| CGC (R) / CTA (L)       |            |                      | 0.005436      |
| GAA (E) / TTG (L)       |            |                      | 0.005472      |
| GCC (A) / AAA (K)       |            |                      | 0.005500      |
| CCA (P) / TTG (L)       |            |                      | 0.005535      |
| AGC (Z) / TTG (L)       |            |                      | 0.005790      |
| GCG (A) / TTT (F)       |            |                      | 0.005884      |
| GGT (G) / AAC (N)       |            |                      | 0.005905      |
| GTC (V) / TTA (L)       |            |                      | 0.005990      |
| AAA (K) / TTC (F)       |            |                      | 0.005996      |

| codon (AA) substitution | synonymous | ECM rate             |               |
|-------------------------|------------|----------------------|---------------|
|                         |            | synonymous SER (S/Z) | nonsynonymous |
| CGA (R) / TCT (S)       |            |                      | 0.006103      |
| GTA (V) / AGT (Z)       |            |                      | 0.006305      |
| GCG (A) / AGT (Z)       |            |                      | 0.006402      |
| GGC (G) / ACG (T)       |            |                      | 0.006459      |
| GAA (E) / TTC (F)       |            |                      | 0.006464      |
| CCA (P) / TTC (F)       |            |                      | 0.006558      |
| GTC (V) / CAA (Q)       |            |                      | 0.006757      |
| GAC (D) / GTA (V)       |            |                      | 0.006776      |
| GAC (D) / TTG (L)       |            |                      | 0.006808      |
| GAT (D) / CGA (R)       |            |                      | 0.007070      |
| GGT (G) / TCG (S)       |            |                      | 0.007109      |
| GAT (D) / GTC (V)       |            |                      | 0.007112      |
| GAC (D) / TCA (S)       |            |                      | 0.007428      |
| CAA (Q) / TTG (L)       |            |                      | 0.007508      |
| GGC (G) / TGT (C)       |            |                      | 0.007608      |
| GAG (E) / CGT (R)       |            |                      | 0.007891      |
| GGG (G) / TAT (Y)       |            |                      | 0.007948      |
| CCG (P) / CTT (L)       |            |                      | 0.007978      |
| ACG (T) / TTT (F)       |            |                      | 0.008032      |
| ATG (M) / CCC (P)       |            |                      | 0.008455      |
| GTA (V) / AAT (N)       |            |                      | 0.008844      |
| GCT (A) / TTA (L)       |            |                      | 0.008892      |
| GGC (G) / CGA (R)       |            |                      | 0.008942      |
| GAC (D) / AGG (R)       |            |                      | 0.008986      |
| GTA (V) / ACT (T)       |            |                      | 0.009008      |
| GAA (E) / ATC (I)       |            |                      | 0.009174      |
| GTT (V) / CCA (P)       |            |                      | 0.009225      |
| AGG (R) / TCA (S)       |            |                      | 0.009261      |
| AGT (Z) / TTG (L)       |            |                      | 0.009289      |
| AGT (Z) / CTA (L)       |            |                      | 0.009512      |
| AGG (R) / CTT (L)       |            |                      | 0.009560      |
| GTT (V) / CAG (Q)       |            |                      | 0.009600      |
| GTG (V) / TAT (Y)       |            |                      | 0.009630      |
| CAG (Q) / TTT (F)       |            |                      | 0.009760      |
| GGA (G) / GTC (V)       |            |                      | 0.009773      |
| CGG (R) / CCT (P)       |            |                      | 0.009880      |
| GAA (E) / TGG (W)       |            |                      | 0.009966      |
| GAC (D) / CGA (R)       |            |                      | 0.009981      |
| GAC (D) / TAT (Y)       |            |                      | 0.010037      |
| GAG (E) / CTC (L)       |            |                      | 0.010061      |
| CTT (L) / TGG (W)       |            |                      | 0.010122      |
| TCG (S) / TTA (L)       |            |                      | 0.010188      |
| CCA (P) / TGC (C)       |            |                      | 0.010250      |
| GTC (V) / ACG (T)       |            |                      | 0.010298      |
| CGG (R) / CCA (P)       |            |                      | 0.010300      |
| GGA (G) / CGG (R)       |            |                      | 0.010419      |
| ACA (T) / TTC (F)       |            |                      | 0.010539      |
| ATC (I) / CAA (Q)       |            |                      | 0.010543      |

| codon (AA) substitution | synonymous | ECM rate             |               |
|-------------------------|------------|----------------------|---------------|
|                         |            | synonymous SER (S/Z) | nonsynonymous |
| AGT (Z) / TTA (L)       |            |                      | 0.010929      |
| GAG (E) / TTT (F)       |            |                      | 0.010974      |
| AAA (K) / CGG (R)       |            |                      | 0.011032      |
| ACA (T) / TTG (L)       |            |                      | 0.011134      |
| GAC (D) / ATG (M)       |            |                      | 0.011379      |
| GTG (V) / ACA (T)       |            |                      | 0.011433      |
| ACT (T) / CCG (P)       |            |                      | 0.011476      |
| AAG (K) / TGT (C)       |            |                      | 0.011489      |
| GAT (D) / GTG (V)       |            |                      | 0.011491      |
| AGA (R) / CCT (P)       |            |                      | 0.011511      |
| GTT (V) / CTG (L)       |            |                      | 0.011580      |
| TCC (S) / TTA (L)       |            |                      | 0.011609      |
| GGT (G) / TCA (S)       |            |                      | 0.011673      |
| GCT (A) / TGC (C)       |            |                      | 0.011733      |
| GGT (G) / CGG (R)       |            |                      | 0.011768      |
| CTA (L) / TAC (Y)       |            |                      | 0.011978      |
| AAG (K) / CCA (P)       |            |                      | 0.012002      |
| GGA (G) / TCT (S)       |            |                      | 0.012121      |
| ATA (I) / TGC (C)       |            |                      | 0.012138      |
| GGC (G) / AGG (R)       |            |                      | 0.012227      |
| AGA (R) / ATC (I)       |            |                      | 0.012331      |
| GAT (D) / CTA (L)       |            |                      | 0.012366      |
| AAA (K) / CCC (P)       |            |                      | 0.012394      |
| ACT (T) / TTA (L)       |            |                      | 0.012473      |
| GAT (D) / AGC (Z)       |            |                      | 0.012481      |
| AGA (R) / TTC (F)       |            |                      | 0.012600      |
| CGC (R) / TGT (C)       |            |                      | 0.012886      |
| GCC (A) / CCA (P)       |            |                      | 0.013077      |
| AAG (K) / TTT (F)       |            |                      | 0.013122      |
| GAG (E) / TGC (C)       |            |                      | 0.013216      |
| GCT (A) / CCG (P)       |            |                      | 0.013526      |
| GTG (V) / AAC (N)       |            |                      | 0.013582      |
| GCT (A) / AGA (R)       |            |                      | 0.013852      |
| GCG (A) / CCT (P)       |            |                      | 0.014101      |
| ACG (T) / CGC (R)       |            |                      | 0.014243      |
| GGG (G) / TAC (Y)       |            |                      | 0.014314      |
| AAT (N) / ATC (I)       |            |                      | 0.014351      |
| CCT (P) / CTG (L)       |            |                      | 0.014388      |
| GAG (E) / TGT (C)       |            |                      | 0.014439      |
| CAC (H) / TCA (S)       |            |                      | 0.014470      |
| AAC (N) / CTA (L)       |            |                      | 0.014540      |
| ACA (T) / CCG (P)       |            |                      | 0.015001      |
| CGT (R) / CTG (L)       |            |                      | 0.015019      |
| GAT (D) / GCC (A)       |            |                      | 0.015140      |
| GGA (G) / CGT (R)       |            |                      | 0.015310      |
| GAT (D) / TAC (Y)       |            |                      | 0.015452      |
| ATG (M) / CGA (R)       |            |                      | 0.015596      |
| ACT (T) / TTG (L)       |            |                      | 0.015652      |

| codon (AA) substitution | synonymous | ECM rate             |               |
|-------------------------|------------|----------------------|---------------|
|                         |            | synonymous SER (S/Z) | nonsynonymous |
| GAC (D) / CTG (L)       |            |                      | 0.015686      |
| GAT (D) / AGG (R)       |            |                      | 0.015763      |
| CGA (R) / TTC (F)       |            |                      | 0.016020      |
| CGC (R) / CTT (L)       |            |                      | 0.016022      |
| GGC (G) / CAA (Q)       |            |                      | 0.016193      |
| CCG (P) / CTA (L)       |            |                      | 0.016442      |
| GCA (A) / TTC (F)       |            |                      | 0.016535      |
| CCA (P) / CTC (L)       |            |                      | 0.016609      |
| CAA (Q) / TTC (F)       |            |                      | 0.016628      |
| AAC (N) / CGA (R)       |            |                      | 0.016636      |
| CTA (L) / TAT (Y)       |            |                      | 0.016650      |
| ACC (T) / ATA (I)       |            |                      | 0.016701      |
| GGT (G) / GTC (V)       |            |                      | 0.016776      |
| GGA (G) / GTG (V)       |            |                      | 0.016839      |
| CTA (L) / TGG (W)       |            |                      | 0.017106      |
| AGC (Z) / CTG (L)       |            |                      | 0.017300      |
| ACC (T) / CGG (R)       |            |                      | 0.017774      |
| GCG (A) / CCA (P)       |            |                      | 0.017824      |
| AGT (Z) / CGC (R)       |            |                      | 0.018146      |
| GGA (G) / TTC (F)       |            |                      | 0.018315      |
| GGC (G) / ATG (M)       |            |                      | 0.018603      |
| GAC (D) / GCT (A)       |            |                      | 0.018617      |
| AGT (Z) / ATC (I)       |            |                      | 0.018727      |
| GGG (G) / TTT (F)       |            |                      | 0.018773      |
| GCC (A) / CAA (Q)       |            |                      | 0.018814      |
| GCA (A) / TTG (L)       |            |                      | 0.019406      |
| AAT (N) / CTA (L)       |            |                      | 0.019568      |
| GTA (V) / CAT (H)       |            |                      | 0.019586      |
| GCC (A) / ACA (T)       |            |                      | 0.019665      |
| CGT (R) / TGG (W)       |            |                      | 0.019696      |
| GCC (A) / CGG (R)       |            |                      | 0.020471      |
| GTA (V) / CTG (L)       |            |                      | 0.020529      |
| CTA (L) / TGT (C)       |            |                      | 0.020649      |
| AAC (N) / ATA (I)       |            |                      | 0.020837      |
| AAA (K) / TCC (S)       |            |                      | 0.020909      |
| AGT (Z) / CCA (P)       |            |                      | 0.021048      |
| GGC (G) / CGT (R)       |            |                      | 0.021435      |
| CCG (P) / TCT (S)       |            |                      | 0.021444      |
| AGC (Z) / ATA (I)       |            |                      | 0.021539      |
| CTA (L) / TGC (C)       |            |                      | 0.021578      |
| GGT (G) / AAG (K)       |            |                      | 0.021649      |
| AGA (R) / ACC (T)       |            |                      | 0.021698      |
| ATC (I) / CCG (P)       |            |                      | 0.021723      |
| ACA (T) / CAC (H)       |            |                      | 0.021920      |
| GCC (A) / CCT (P)       |            |                      | 0.022062      |
| GGC (G) / GCT (A)       |            |                      | 0.022214      |
| AAG (K) / CTC (L)       |            |                      | 0.022384      |
| AAA (K) / ATC (I)       |            |                      | 0.023020      |

| codon (AA) substitution | synonymous | ECM rate             |               |
|-------------------------|------------|----------------------|---------------|
|                         |            | synonymous SER (S/Z) | nonsynonymous |
| GCG (A) / ACT (T)       |            |                      | 0.023862      |
| CGG (R) / TGT (C)       |            |                      | 0.023909      |
| GTG (V) / TTA (L)       |            |                      | 0.024699      |
| GGT (G) / GTG (V)       |            |                      | 0.024883      |
| AGT (Z) / CGG (R)       |            |                      | 0.025006      |
| CCA (P) / TTT (F)       |            |                      | 0.025217      |
| AAC (N) / ATT (I)       |            |                      | 0.025405      |
| ATA (I) / TAC (Y)       |            |                      | 0.025454      |
| AGA (R) / CAC (H)       |            |                      | 0.025544      |
| GAA (E) / CGC (R)       |            |                      | 0.025678      |
| CCA (P) / TAC (Y)       |            |                      | 0.025873      |
| ACA (T) / CCC (P)       |            |                      | 0.026230      |
| GTC (V) / TTT (F)       |            |                      | 0.026338      |
| CAT (H) / TTA (L)       |            |                      | 0.026551      |
| CCC (P) / CTT (L)       |            |                      | 0.026571      |
| GCG (A) / TAT (Y)       |            |                      | 0.027035      |
| ACC (T) / CCA (P)       |            |                      | 0.027138      |
| CGG (R) / TTC (F)       |            |                      | 0.027355      |
| GGT (G) / ATG (M)       |            |                      | 0.027479      |
| GAC (D) / GCA (A)       |            |                      | 0.027912      |
| GGC (G) / GCA (A)       |            |                      | 0.027973      |
| GAT (D) / TGG (W)       |            |                      | 0.028249      |
| GCG (A) / TGT (C)       |            |                      | 0.028567      |
| GCC (A) / GTA (V)       |            |                      | 0.028569      |
| AGG (R) / TCC (S)       |            |                      | 0.028715      |
| ATG (M) / CGT (R)       |            |                      | 0.028736      |
| GAA (E) / TGT (C)       |            |                      | 0.028878      |
| ACT (T) / CAG (Q)       |            |                      | 0.029088      |
| ATG (M) / CGC (R)       |            |                      | 0.029786      |
| GGA (G) / TAC (Y)       |            |                      | 0.029826      |
| TCC (S) / TTT (F)       |            |                      | 0.030074      |
| CGA (R) / TTT (F)       |            |                      | 0.030121      |
| GGT (G) / GAG (E)       |            |                      | 0.030223      |
| GAT (D) / AGA (R)       |            |                      | 0.030474      |
| GGC (G) / GAA (E)       |            |                      | 0.030585      |
| AGA (R) / TGC (C)       |            |                      | 0.030883      |
| AGC (Z) / ATT (I)       |            |                      | 0.031140      |
| GCA (A) / TGG (W)       |            |                      | 0.031466      |
| GAT (D) / CCG (P)       |            |                      | 0.031560      |
| GTC (V) / CCG (P)       |            |                      | 0.031642      |
| GTA (V) / CTC (L)       |            |                      | 0.031730      |
| GAG (E) / ATC (I)       |            |                      | 0.031984      |
| GGG (G) / TTC (F)       |            |                      | 0.032039      |
| CGC (R) / TCG (S)       |            |                      | 0.032106      |
| GTT (V) / AGA (R)       |            |                      | 0.032116      |
| CCA (P) / TAT (Y)       |            |                      | 0.032140      |
| GGG (G) / GTT (V)       |            |                      | 0.032177      |
| CAA (Q) / TGC (C)       |            |                      | 0.032232      |

| codon (AA) substitution | synonymous | ECM rate                |               |
|-------------------------|------------|-------------------------|---------------|
|                         |            | synonymous SER<br>(S/Z) | nonsynonymous |
| GTG (V) / CAT (H)       |            |                         | 0.032237      |
| GAC (D) / ATC (I)       |            |                         | 0.032447      |
| CCC (P) / TGG (W)       |            |                         | 0.032564      |
| AGG (R) / CCC (P)       |            |                         | 0.033244      |
| CAA (Q) / CTG (L)       |            |                         | 0.033372      |
| TAC (Y) / TTA (L)       |            |                         | 0.033529      |
| GAG (E) / ACT (T)       |            |                         | 0.033581      |
| GAA (E) / ATG (M)       |            |                         | 0.033994      |
| TCG (S) / TTT (F)       |            |                         | 0.034137      |
| GAG (E) / TTC (F)       |            |                         | 0.034428      |
| GAG (E) / CCT (P)       |            |                         | 0.034437      |
| AAG (K) / CGA (R)       |            |                         | 0.034519      |
| ACC (T) / ATT (I)       |            |                         | 0.034573      |
| GCA (A) / TAC (Y)       |            |                         | 0.034737      |
| AAG (K) / TGC (C)       |            |                         | 0.034794      |
| AAC (N) / CTG (L)       |            |                         | 0.034916      |
| GAA (E) / CGT (R)       |            |                         | 0.034978      |
| GGT (G) / GAC (D)       |            |                         | 0.035120      |
| GCT (A) / TTG (L)       |            |                         | 0.035630      |
| GCT (A) / TGG (W)       |            |                         | 0.035860      |
| ACT (T) / TGG (W)       |            |                         | 0.035939      |
| GGA (G) / GCC (A)       |            |                         | 0.036022      |
| CCT (P) / CTC (L)       |            |                         | 0.036254      |
| ACG (T) / TTC (F)       |            |                         | 0.036489      |
| CCG (P) / TAC (Y)       |            |                         | 0.037372      |
| GGC (G) / GAT (D)       |            |                         | 0.037461      |
| GGT (G) / AGA (R)       |            |                         | 0.037657      |
| GGA (G) / ATG (M)       |            |                         | 0.037724      |
| ACC (T) / TGG (W)       |            |                         | 0.037822      |
| GAT (D) / TTG (L)       |            |                         | 0.038557      |
| GCC (A) / ACT (T)       |            |                         | 0.038559      |
| GAA (E) / ATT (I)       |            |                         | 0.038612      |
| GTT (V) / TGG (W)       |            |                         | 0.038763      |
| GCA (A) / CAT (H)       |            |                         | 0.039265      |
| GGT (G) / TGG (W)       |            |                         | 0.039313      |
| AAG (K) / CTT (L)       |            |                         | 0.039362      |
| CGG (R) / CTT (L)       |            |                         | 0.039428      |
| GAA (E) / CTT (L)       |            |                         | 0.039560      |
| TGC (C) / TTA (L)       |            |                         | 0.040012      |
| CCC (P) / CTA (L)       |            |                         | 0.040087      |
| ATA (I) / CAT (H)       |            |                         | 0.040109      |
| CAT (H) / TTG (L)       |            |                         | 0.040275      |
| AGG (R) / CTG (L)       |            |                         | 0.040320      |
| AAT (N) / TCG (S)       |            |                         | 0.040706      |
| CGG (R) / CTA (L)       |            |                         | 0.040902      |
| GCT (A) / CAG (Q)       |            |                         | 0.040907      |
| CCA (P) / CTG (L)       |            |                         | 0.040917      |
| GAC (D) / GTG (V)       |            |                         | 0.041280      |

| codon (AA) substitution | synonymous | ECM rate             |               |
|-------------------------|------------|----------------------|---------------|
|                         |            | synonymous SER (S/Z) | nonsynonymous |
| GCA (A) / AAC (N)       |            |                      | 0.041435      |
| AAG (K) / ATT (I)       |            |                      | 0.041440      |
| CGA (R) / CTG (L)       |            |                      | 0.041969      |
| GGT (G) / CGA (R)       |            |                      | 0.042005      |
| ATG (M) / CCA (P)       |            |                      | 0.042006      |
| GAT (D) / TTA (L)       |            |                      | 0.042112      |
| ACG (T) / TAT (Y)       |            |                      | 0.042119      |
| ATG (M) / TCC (S)       |            |                      | 0.042282      |
| GAG (E) / TCT (S)       |            |                      | 0.042380      |
| GAA (E) / GTC (V)       |            |                      | 0.042565      |
| GAT (D) / ACG (T)       |            |                      | 0.042595      |
| AAT (N) / TAC (Y)       |            |                      | 0.042762      |
| GGT (G) / CAA (Q)       |            |                      | 0.042812      |
| GAG (E) / TAT (Y)       |            |                      | 0.042815      |
| AAA (K) / TAC (Y)       |            |                      | 0.042942      |
| GAT (D) / GCG (A)       |            |                      | 0.043198      |
| GGG (G) / CGT (R)       |            |                      | 0.043222      |
| AAG (K) / TTC (F)       |            |                      | 0.043609      |
| GAA (E) / TAC (Y)       |            |                      | 0.043721      |
| GTC (V) / CTA (L)       |            |                      | 0.043756      |
| CGA (R) / TAT (Y)       |            |                      | 0.043917      |
| GTG (V) / CAC (H)       |            |                      | 0.044112      |
| ACC (T) / CCT (P)       |            |                      | 0.044125      |
| GCC (A) / TGG (W)       |            |                      | 0.044178      |
| CGT (R) / CCG (P)       |            |                      | 0.044676      |
| CAT (H) / CTG (L)       |            |                      | 0.044742      |
| GGT (G) / TGC (C)       |            |                      | 0.045044      |
| GCT (A) / AGG (R)       |            |                      | 0.045374      |
| TGC (C) / TTT (F)       |            |                      | 0.045951      |
| GCC (A) / GTT (V)       |            |                      | 0.046583      |
| AAC (N) / TAT (Y)       |            |                      | 0.046586      |
| GGA (G) / GCG (A)       |            |                      | 0.046588      |
| GAT (D) / CAC (H)       |            |                      | 0.046739      |
| TAT (Y) / TCC (S)       |            |                      | 0.047115      |
| GGC (G) / CTG (L)       |            |                      | 0.047268      |
| GTA (V) / TTC (F)       |            |                      | 0.047403      |
| GGT (G) / AGG (R)       |            |                      | 0.047437      |
| AGA (R) / TCT (S)       |            |                      | 0.047890      |
| GGT (G) / AAA (K)       |            |                      | 0.048730      |
| ATA (I) / CTG (L)       |            |                      | 0.048882      |
| ACA (T) / ATC (I)       |            |                      | 0.048902      |
| CAG (Q) / TCT (S)       |            |                      | 0.049246      |
| GAG (E) / GTT (V)       |            |                      | 0.049842      |
| GCG (A) / ACA (T)       |            |                      | 0.049848      |
| AAA (K) / TGG (W)       |            |                      | 0.051005      |
| GGC (G) / GTG (V)       |            |                      | 0.051048      |
| CGA (R) / TAC (Y)       |            |                      | 0.051686      |
| GTT (V) / AGG (R)       |            |                      | 0.051709      |

| codon (AA) substitution | synonymous | ECM rate             |               |
|-------------------------|------------|----------------------|---------------|
|                         |            | synonymous SER (S/Z) | nonsynonymous |
| TCT (S) / TTC (F)       |            |                      | 0.052602      |
| GAG (E) / GTA (V)       |            |                      | 0.053017      |
| GAC (D) / AAA (K)       |            |                      | 0.053168      |
| ACA (T) / TAC (Y)       |            |                      | 0.053363      |
| GGG (G) / CAC (H)       |            |                      | 0.053714      |
| GGA (G) / GAG (E)       |            |                      | 0.053748      |
| ACT (T) / CCC (P)       |            |                      | 0.053805      |
| ACG (T) / TGT (C)       |            |                      | 0.053874      |
| AAC (N) / TGG (W)       |            |                      | 0.053908      |
| CAT (H) / CCG (P)       |            |                      | 0.054021      |
| GGC (G) / AGT (Z)       |            |                      | 0.054025      |
| GCG (A) / GTT (V)       |            |                      | 0.054049      |
| TGT (C) / TAC (Y)       |            |                      | 0.054860      |
| GAA (E) / GTG (V)       |            |                      | 0.055025      |
| CAA (Q) / TGG (W)       |            |                      | 0.055163      |
| GAC (D) / TTC (F)       |            |                      | 0.055366      |
| GGC (G) / ATC (I)       |            |                      | 0.055425      |
| ATC (I) / TTT (F)       |            |                      | 0.056038      |
| GTC (V) / AAG (K)       |            |                      | 0.056145      |
| GTT (V) / ACA (T)       |            |                      | 0.056250      |
| AAG (K) / ATA (I)       |            |                      | 0.056267      |
| TCA (S) / TTC (F)       |            |                      | 0.056677      |
| AGG (R) / TTC (F)       |            |                      | 0.056771      |
| CAT (H) / CTC (L)       |            |                      | 0.057328      |
| CAG (Q) / TGT (C)       |            |                      | 0.057910      |
| TAT (Y) / TCG (S)       |            |                      | 0.058136      |
| CAC (H) / CTT (L)       |            |                      | 0.058614      |
| GTA (V) / TGG (W)       |            |                      | 0.058616      |
| GAT (D) / ATG (M)       |            |                      | 0.059065      |
| CAC (H) / CTA (L)       |            |                      | 0.059927      |
| ATT (I) / TTC (F)       |            |                      | 0.059956      |
| ACA (T) / TGG (W)       |            |                      | 0.060421      |
| GTA (V) / TAC (Y)       |            |                      | 0.060430      |
| AGG (R) / CCT (P)       |            |                      | 0.060432      |
| AAC (N) / TTG (L)       |            |                      | 0.060699      |
| AGA (R) / TAC (Y)       |            |                      | 0.060909      |
| AAA (K) / CTT (L)       |            |                      | 0.060922      |
| ACA (T) / TGC (C)       |            |                      | 0.061227      |
| GGA (G) / TGC (C)       |            |                      | 0.061497      |
| CAC (H) / CCT (P)       |            |                      | 0.061583      |
| CCT (P) / TGG (W)       |            |                      | 0.061833      |
| AGG (R) / ATC (I)       |            |                      | 0.062369      |
| GCA (A) / AGC (Z)       |            |                      | 0.063353      |
| CAA (Q) / CCG (P)       |            |                      | 0.063366      |
| CGT (R) / CCA (P)       |            |                      | 0.063413      |
| AGG (R) / TCT (S)       |            |                      | 0.063994      |
| GGG (G) / GTC (V)       |            |                      | 0.064227      |
| GAT (D) / TTT (F)       |            |                      | 0.064397      |

| codon (AA) substitution | synonymous | ECM rate             |               |
|-------------------------|------------|----------------------|---------------|
|                         |            | synonymous SER (S/Z) | nonsynonymous |
| CCG (P) / TCA (S)       |            |                      | 0.064924      |
| ATA (I) / TTC (F)       |            |                      | 0.064968      |
| AAC (N) / CGG (R)       |            |                      | 0.065212      |
| CCA (P) / CTT (L)       |            |                      | 0.065669      |
| GTT (V) / TTC (F)       |            |                      | 0.065905      |
| GAC (D) / TGG (W)       |            |                      | 0.066384      |
| ACC (T) / CAA (Q)       |            |                      | 0.066519      |
| GAT (D) / ATT (I)       |            |                      | 0.066966      |
| GGA (G) / GAC (D)       |            |                      | 0.067431      |
| AAT (N) / ACC (T)       |            |                      | 0.067554      |
| TGC (C) / TAT (Y)       |            |                      | 0.068342      |
| GCG (A) / AAC (N)       |            |                      | 0.068501      |
| CGT (R) / CTC (L)       |            |                      | 0.068758      |
| GTG (V) / TTT (F)       |            |                      | 0.068927      |
| GTC (V) / CAG (Q)       |            |                      | 0.069320      |
| ATA (I) / TGT (C)       |            |                      | 0.069555      |
| GGG (G) / AGA (R)       |            |                      | 0.069567      |
| TAC (Y) / TCT (S)       |            |                      | 0.069588      |
| GCA (A) / CCC (P)       |            |                      | 0.069754      |
| TGG (W) / TCT (S)       |            |                      | 0.069758      |
| GGT (G) / ATT (I)       |            |                      | 0.069995      |
| CCA (P) / TGG (W)       |            |                      | 0.070308      |
| AGG (R) / TGC (C)       |            |                      | 0.070533      |
| TAC (Y) / TCA (S)       |            |                      | 0.070809      |
| GAC (D) / TGC (C)       |            |                      | 0.071612      |
| CAA (Q) / CTC (L)       |            |                      | 0.071794      |
| GTT (V) / AAG (K)       |            |                      | 0.072138      |
| CCC (P) / TCA (S)       |            |                      | 0.072352      |
| GGT (G) / GTA (V)       |            |                      | 0.072521      |
| GTT (V) / CTC (L)       |            |                      | 0.072866      |
| AAG (K) / TAT (Y)       |            |                      | 0.072867      |
| GCT (A) / CCC (P)       |            |                      | 0.073021      |
| CTG (L) / TTT (F)       |            |                      | 0.073550      |
| ACC (T) / CTG (L)       |            |                      | 0.073657      |
| GGA (G) / TGG (W)       |            |                      | 0.073682      |
| CAT (H) / TCG (S)       |            |                      | 0.073730      |
| AAC (N) / CCA (P)       |            |                      | 0.074161      |
| GGG (G) / GTA (V)       |            |                      | 0.074536      |
| CAA (Q) / CCC (P)       |            |                      | 0.074846      |
| GCG (A) / TTC (F)       |            |                      | 0.074851      |
| AAT (N) / TGG (W)       |            |                      | 0.074859      |
| ACT (T) / ATC (I)       |            |                      | 0.075878      |
| ATT (I) / CGT (R)       |            |                      | 0.076434      |
| TGT (C) / TTC (F)       |            |                      | 0.076912      |
| ACG (T) / CAT (H)       |            |                      | 0.076938      |
| GCA (A) / ACC (T)       |            |                      | 0.077341      |
| CGT (R) / TGC (C)       |            |                      | 0.077815      |
| AAT (N) / TTG (L)       |            |                      | 0.077878      |

| codon (AA) substitution | synonymous | ECM rate             |               |
|-------------------------|------------|----------------------|---------------|
|                         |            | synonymous SER (S/Z) | nonsynonymous |
| ATT (I) / TGG (W)       |            |                      | 0.078312      |
| GAT (D) / GTA (V)       |            |                      | 0.078381      |
| CCT (P) / TCG (S)       |            |                      | 0.078776      |
| ATT (I) / CAA (Q)       |            |                      | 0.078926      |
| CAG (Q) / CTT (L)       |            |                      | 0.079119      |
| CCG (P) / TTC (F)       |            |                      | 0.079161      |
| CAA (Q) / TAC (Y)       |            |                      | 0.079236      |
| ACG (T) / CCT (P)       |            |                      | 0.079712      |
| ACA (T) / TTT (F)       |            |                      | 0.079948      |
| GCG (A) / CAT (H)       |            |                      | 0.080124      |
| GGA (G) / GTT (V)       |            |                      | 0.080337      |
| CAA (Q) / TCC (S)       |            |                      | 0.080383      |
| TGG (W) / TCC (S)       |            |                      | 0.081312      |
| ATG (M) / CCT (P)       |            |                      | 0.081631      |
| GCG (A) / GTA (V)       |            |                      | 0.081861      |
| CGG (R) / TAC (Y)       |            |                      | 0.081931      |
| GGA (G) / TAT (Y)       |            |                      | 0.082323      |
| ACA (T) / CAT (H)       |            |                      | 0.082373      |
| AGT (Z) / CAG (Q)       |            |                      | 0.083261      |
| AGG (R) / TTT (F)       |            |                      | 0.083310      |
| ACG (T) / CCA (P)       |            |                      | 0.083475      |
| GGT (G) / GCG (A)       |            |                      | 0.083552      |
| AGT (Z) / TCC (S)       |            | 0.083636             |               |
| CTC (L) / TTT (F)       |            |                      | 0.083684      |
| GCG (A) / CGC (R)       |            |                      | 0.083744      |
| GGG (G) / CAT (H)       |            |                      | 0.084060      |
| GCC (A) / TCA (S)       |            |                      | 0.084218      |
| GCA (A) / AAT (N)       |            |                      | 0.084620      |
| GAA (E) / TTT (F)       |            |                      | 0.084945      |
| GAA (E) / TCC (S)       |            |                      | 0.085680      |
| GGT (G) / GCC (A)       |            |                      | 0.086923      |
| GTA (V) / TGC (C)       |            |                      | 0.086986      |
| GCA (A) / CCG (P)       |            |                      | 0.087384      |
| AGA (R) / ACG (T)       |            |                      | 0.087905      |
| GGT (G) / GAA (E)       |            |                      | 0.089148      |
| ATT (I) / CTG (L)       |            |                      | 0.089308      |
| AAA (K) / ACC (T)       |            |                      | 0.089476      |
| GTG (V) / ACC (T)       |            |                      | 0.089643      |
| CAC (H) / CCA (P)       |            |                      | 0.089835      |
| ACG (T) / ATT (I)       |            |                      | 0.090674      |
| CGA (R) / CCG (P)       |            |                      | 0.091073      |
| CAT (H) / CCC (P)       |            |                      | 0.091276      |
| GTG (V) / CTT (L)       |            |                      | 0.091844      |
| GTC (V) / TGG (W)       |            |                      | 0.092044      |
| CAG (Q) / TAT (Y)       |            |                      | 0.092070      |
| GCA (A) / GTC (V)       |            |                      | 0.092405      |
| GAT (D) / ACA (T)       |            |                      | 0.092988      |
| ATG (M) / TCT (S)       |            |                      | 0.093491      |

| codon (AA) substitution | synonymous | ECM rate             |               |
|-------------------------|------------|----------------------|---------------|
|                         |            | synonymous SER (S/Z) | nonsynonymous |
| AGG (R) / ATT (I)       |            |                      | 0.093542      |
| AGC (Z) / TCT (S)       |            | 0.094762             |               |
| GAC (D) / ACG (T)       |            |                      | 0.095207      |
| AAC (N) / CCG (P)       |            |                      | 0.095418      |
| AAT (N) / CCA (P)       |            |                      | 0.096104      |
| GGG (G) / CGC (R)       |            |                      | 0.097165      |
| GGA (G) / CAT (H)       |            |                      | 0.097554      |
| AAA (K) / TGT (C)       |            |                      | 0.099519      |
| GAT (D) / TGT (C)       |            |                      | 0.099985      |
| GAC (D) / CAT (H)       |            |                      | 0.100928      |
| CCC (P) / TCT (S)       |            |                      | 0.101204      |
| ACG (T) / CAC (H)       |            |                      | 0.103080      |
| GCG (A) / TCT (S)       |            |                      | 0.103323      |
| GCC (A) / CTG (L)       |            |                      | 0.103766      |
| AGC (Z) / CCG (P)       |            |                      | 0.104681      |
| GAA (E) / CCC (P)       |            |                      | 0.105112      |
| AAG (K) / TGG (W)       |            |                      | 0.105226      |
| GGC (G) / TGG (W)       |            |                      | 0.105305      |
| GTC (V) / CTT (L)       |            |                      | 0.105361      |
| CAG (Q) / CTA (L)       |            |                      | 0.105449      |
| CAG (Q) / TGC (C)       |            |                      | 0.105597      |
| GGG (G) / TGT (C)       |            |                      | 0.105884      |
| ATC (I) / CAG (Q)       |            |                      | 0.105885      |
| GAA (E) / CAC (H)       |            |                      | 0.106069      |
| GCG (A) / TAC (Y)       |            |                      | 0.106187      |
| GAG (E) / GCT (A)       |            |                      | 0.106257      |
| CAG (Q) / TTC (F)       |            |                      | 0.107218      |
| CAG (Q) / CCT (P)       |            |                      | 0.107434      |
| GCT (A) / ACG (T)       |            |                      | 0.108501      |
| GAA (E) / ACC (T)       |            |                      | 0.109664      |
| GCA (A) / TTT (F)       |            |                      | 0.109975      |
| GCC (A) / TCT (S)       |            |                      | 0.111968      |
| CGA (R) / CTC (L)       |            |                      | 0.112395      |
| CCG (P) / TTG (L)       |            |                      | 0.112999      |
| CTC (L) / TGG (W)       |            |                      | 0.113701      |
| GGA (G) / TTT (F)       |            |                      | 0.113991      |
| CAC (H) / TCG (S)       |            |                      | 0.114551      |
| ATC (I) / TCC (S)       |            |                      | 0.115975      |
| AGA (R) / ATT (I)       |            |                      | 0.116039      |
| GTG (V) / TAC (Y)       |            |                      | 0.116309      |
| AAG (K) / ATC (I)       |            |                      | 0.116405      |
| GAT (D) / TCG (S)       |            |                      | 0.117533      |
| CCG (P) / CTC (L)       |            |                      | 0.118229      |
| GAC (D) / GTC (V)       |            |                      | 0.119062      |
| GCT (A) / ACC (T)       |            |                      | 0.120121      |
| GAC (D) / CAA (Q)       |            |                      | 0.121389      |
| ATA (I) / CGA (R)       |            |                      | 0.121855      |
| TGC (C) / TCA (S)       |            |                      | 0.121937      |

| codon (AA) substitution | synonymous | ECM rate             |               |
|-------------------------|------------|----------------------|---------------|
|                         |            | synonymous SER (S/Z) | nonsynonymous |
| AGG (R) / TGT (C)       |            |                      | 0.122186      |
| CGT (R) / CCC (P)       |            |                      | 0.124232      |
| CAA (Q) / TTT (F)       |            |                      | 0.126320      |
| GCA (A) / AGT (Z)       |            |                      | 0.126382      |
| GTG (V) / TGT (C)       |            |                      | 0.126844      |
| GGC (G) / TAC (Y)       |            |                      | 0.127388      |
| CGG (R) / TTG (L)       |            |                      | 0.127696      |
| ATC (I) / CAC (H)       |            |                      | 0.127899      |
| CAT (H) / TCA (S)       |            |                      | 0.128111      |
| GAG (E) / AGT (Z)       |            |                      | 0.129098      |
| GAT (D) / CTT (L)       |            |                      | 0.129492      |
| GAT (D) / CAG (Q)       |            |                      | 0.130873      |
| GGT (G) / TAT (Y)       |            |                      | 0.130940      |
| GCT (A) / GTC (V)       |            |                      | 0.131929      |
| AAG (K) / CTG (L)       |            |                      | 0.133032      |
| CGT (R) / CTA (L)       |            |                      | 0.134394      |
| GAC (D) / CTC (L)       |            |                      | 0.135255      |
| ATA (I) / CTC (L)       |            |                      | 0.136148      |
| GAG (E) / TAC (Y)       |            |                      | 0.136432      |
| CGA (R) / TTA (L)       |            |                      | 0.136647      |
| ATC (I) / TGG (W)       |            |                      | 0.136849      |
| GGG (G) / GAA (E)       |            |                      | 0.136937      |
| GAG (E) / TGG (W)       |            |                      | 0.137634      |
| TGC (C) / TCT (S)       |            |                      | 0.138244      |
| CCA (P) / TCC (S)       |            |                      | 0.138742      |
| AGT (Z) / TGG (W)       |            |                      | 0.139046      |
| AGA (R) / TTT (F)       |            |                      | 0.140516      |
| GAA (E) / GCC (A)       |            |                      | 0.140546      |
| AGG (R) / ACC (T)       |            |                      | 0.140701      |
| AAG (K) / TAC (Y)       |            |                      | 0.140864      |
| GTC (V) / TTG (L)       |            |                      | 0.140867      |
| AGG (R) / CAT (H)       |            |                      | 0.140943      |
| TGT (C) / TCG (S)       |            |                      | 0.143447      |
| AAA (K) / CAC (H)       |            |                      | 0.143479      |
| GGG (G) / CGA (R)       |            |                      | 0.143481      |
| AAC (N) / TTC (F)       |            |                      | 0.143614      |
| CGT (R) / TTT (F)       |            |                      | 0.143832      |
| AGA (R) / TGT (C)       |            |                      | 0.144388      |
| AGA (R) / TGG (W)       |            |                      | 0.145245      |
| CGA (R) / TGG (W)       |            |                      | 0.146501      |
| GAT (D) / CCA (P)       |            |                      | 0.147873      |
| AAA (K) / TTT (F)       |            |                      | 0.148268      |
| CGC (R) / CAA (Q)       |            |                      | 0.148940      |
| GAG (E) / AAT (N)       |            |                      | 0.149578      |
| CCC (P) / CTG (L)       |            |                      | 0.149771      |
| ACC (T) / TCA (S)       |            |                      | 0.150107      |
| GAC (D) / CGG (R)       |            |                      | 0.150527      |
| GCG (A) / TCA (S)       |            |                      | 0.150589      |

| codon (AA) substitution | synonymous | ECM rate             |               |
|-------------------------|------------|----------------------|---------------|
|                         |            | synonymous SER (S/Z) | nonsynonymous |
| GTT (V) / CAA (Q)       |            |                      | 0.150804      |
| CCA (P) / TCG (S)       |            |                      | 0.151589      |
| TTA (L) / TTC (F)       |            |                      | 0.151858      |
| GCT (A) / GTG (V)       |            |                      | 0.152215      |
| GAT (D) / GTT (V)       |            |                      | 0.153418      |
| CGA (R) / CCC (P)       |            |                      | 0.154017      |
| GTC (V) / ATA (I)       |            |                      | 0.154207      |
| ACG (T) / ATA (I)       |            |                      | 0.154441      |
| AAG (K) / TCT (S)       |            |                      | 0.156468      |
| GAG (E) / GCA (A)       |            |                      | 0.157605      |
| TCC (S) / TTG (L)       |            |                      | 0.158873      |
| GAG (E) / CAT (H)       |            |                      | 0.159217      |
| GAG (E) / AAA (K)       |            |                      | 0.159248      |
| GAG (E) / TTG (L)       |            |                      | 0.159955      |
| GAT (D) / CGT (R)       |            |                      | 0.162525      |
| CAA (Q) / TGT (C)       |            |                      | 0.163174      |
| ATG (M) / CAC (H)       |            |                      | 0.163406      |
| GGT (G) / GTT (V)       |            |                      | 0.164143      |
| GGT (G) / TTT (F)       |            |                      | 0.164659      |
| GGA (G) / AGG (R)       |            |                      | 0.165587      |
| GGA (G) / CTA (L)       |            |                      | 0.165784      |
| CGA (R) / TGC (C)       |            |                      | 0.166150      |
| AGC (Z) / TTC (F)       |            |                      | 0.166706      |
| GAC (D) / AAT (N)       |            |                      | 0.167041      |
| AGC (Z) / TGG (W)       |            |                      | 0.167138      |
| AGG (R) / CAC (H)       |            |                      | 0.169022      |
| GCC (A) / ATG (M)       |            |                      | 0.169264      |
| GGT (G) / CTT (L)       |            |                      | 0.169777      |
| ATA (I) / TGG (W)       |            |                      | 0.170041      |
| CGC (R) / CAT (H)       |            |                      | 0.170088      |
| ATT (I) / TCT (S)       |            |                      | 0.172403      |
| GGC (G) / TTC (F)       |            |                      | 0.172889      |
| GTG (V) / CTA (L)       |            |                      | 0.173122      |
| ACG (T) / TGC (C)       |            |                      | 0.173298      |
| AAC (N) / ATC (I)       |            |                      | 0.175491      |
| GGG (G) / TTG (L)       |            |                      | 0.175861      |
| GGC (G) / AAG (K)       |            |                      | 0.176224      |
| GAG (E) / CTG (L)       |            |                      | 0.176300      |
| CGC (R) / TGG (W)       |            |                      | 0.176476      |
| GCA (A) / TAT (Y)       |            |                      | 0.176829      |
| ACG (T) / TAC (Y)       |            |                      | 0.177757      |
| TAC (Y) / TTG (L)       |            |                      | 0.177833      |
| CCT (P) / CTA (L)       |            |                      | 0.181411      |
| AGT (Z) / TGC (C)       |            |                      | 0.181794      |
| CGG (R) / TGC (C)       |            |                      | 0.183143      |
| GGG (G) / TGC (C)       |            |                      | 0.183952      |
| ATT (I) / CTC (L)       |            |                      | 0.184010      |
| CAG (Q) / CCA (P)       |            |                      | 0.184327      |

| codon (AA) substitution | synonymous | ECM rate             |               |
|-------------------------|------------|----------------------|---------------|
|                         |            | synonymous SER (S/Z) | nonsynonymous |
| GAC (D) / TAC (Y)       |            |                      | 0.184704      |
| GAA (E) / CCT (P)       |            |                      | 0.184749      |
| GGG (G) / CTG (L)       |            |                      | 0.185038      |
| AAC (N) / TCA (S)       |            |                      | 0.187826      |
| GCG (A) / AGG (R)       |            |                      | 0.187832      |
| AAC (N) / CTC (L)       |            |                      | 0.187880      |
| GAT (D) / AAG (K)       |            |                      | 0.188097      |
| AAT (N) / CAC (H)       |            |                      | 0.188587      |
| GAT (D) / GCA (A)       |            |                      | 0.189090      |
| GCG (A) / CAC (H)       |            |                      | 0.190037      |
| ATT (I) / CAT (H)       |            |                      | 0.193328      |
| ATG (M) / CCG (P)       |            |                      | 0.193459      |
| GAA (E) / AAC (N)       |            |                      | 0.193544      |
| GGA (G) / ATA (I)       |            |                      | 0.194319      |
| GGG (G) / AAT (N)       |            |                      | 0.194964      |
| CAT (H) / TGG (W)       |            |                      | 0.195073      |
| TGG (W) / TCA (S)       |            |                      | 0.195833      |
| CCT (P) / TCC (S)       |            |                      | 0.196358      |
| ACC (T) / TCT (S)       |            |                      | 0.196983      |
| GGA (G) / TGT (C)       |            |                      | 0.197641      |
| TCG (S) / TTC (F)       |            |                      | 0.198277      |
| CTA (L) / TTC (F)       |            |                      | 0.198558      |
| AAA (K) / ACG (T)       |            |                      | 0.199589      |
| ACT (T) / TCG (S)       |            |                      | 0.199748      |
| GCG (A) / AGC (Z)       |            |                      | 0.200205      |
| AGG (R) / TAT (Y)       |            |                      | 0.200499      |
| CGC (R) / TTC (F)       |            |                      | 0.200806      |
| GGA (G) / TTA (L)       |            |                      | 0.201112      |
| GGC (G) / GTC (V)       |            |                      | 0.201477      |
| GTT (V) / AAA (K)       |            |                      | 0.201480      |
| ATC (I) / CTA (L)       |            |                      | 0.203017      |
| AAT (N) / CAG (Q)       |            |                      | 0.206851      |
| CTT (L) / TTC (F)       |            |                      | 0.207692      |
| ACA (T) / TAT (Y)       |            |                      | 0.208041      |
| AAT (N) / ATG (M)       |            |                      | 0.208924      |
| TGG (W) / TGC (C)       |            |                      | 0.210115      |
| TAC (Y) / TCG (S)       |            |                      | 0.213967      |
| GTC (V) / AAC (N)       |            |                      | 0.215492      |
| CCC (P) / TGC (C)       |            |                      | 0.215779      |
| CCG (P) / TGG (W)       |            |                      | 0.215788      |
| GCT (A) / AAA (K)       |            |                      | 0.216244      |
| AAC (N) / ATG (M)       |            |                      | 0.219170      |
| AAG (K) / CCT (P)       |            |                      | 0.220816      |
| GCG (A) / TTG (L)       |            |                      | 0.220908      |
| AAA (K) / ATT (I)       |            |                      | 0.221536      |
| GAT (D) / TAT (Y)       |            |                      | 0.223763      |
| AAT (N) / ACG (T)       |            |                      | 0.224397      |
| AGT (Z) / TTT (F)       |            |                      | 0.225554      |

| codon (AA) substitution | synonymous | ECM rate             |               |
|-------------------------|------------|----------------------|---------------|
|                         |            | synonymous SER (S/Z) | nonsynonymous |
| GAA (E) / GCG (A)       |            |                      | 0.227527      |
| AGC (Z) / CAA (Q)       |            |                      | 0.232701      |
| CGA (R) / TGT (C)       |            |                      | 0.232728      |
| GGG (G) / GAT (D)       |            |                      | 0.235747      |
| GTA (V) / TAT (Y)       |            |                      | 0.236179      |
| AGC (Z) / ATC (I)       |            |                      | 0.238533      |
| ATC (I) / CGC (R)       |            |                      | 0.238839      |
| GGG (G) / GCT (A)       |            |                      | 0.238907      |
| AAT (N) / ATT (I)       |            |                      | 0.239388      |
| CCT (P) / TGT (C)       |            |                      | 0.239715      |
| GGC (G) / GAG (E)       |            |                      | 0.239725      |
| GGC (G) / CTC (L)       |            |                      | 0.240505      |
| TGC (C) / TTG (L)       |            |                      | 0.240632      |
| GGT (G) / CGT (R)       |            |                      | 0.241197      |
| GAG (E) / GTC (V)       |            |                      | 0.245019      |
| ATG (M) / TCA (S)       |            |                      | 0.246094      |
| AAA (K) / CCT (P)       |            |                      | 0.247195      |
| GGA (G) / CGA (R)       |            |                      | 0.247245      |
| CAG (Q) / TGG (W)       |            |                      | 0.247490      |
| AGC (Z) / TGT (C)       |            |                      | 0.248099      |
| TCT (S) / TTA (L)       |            |                      | 0.249707      |
| GCT (A) / TCG (S)       |            |                      | 0.250545      |
| CAG (Q) / TTG (L)       |            |                      | 0.250748      |
| GAA (E) / ACT (T)       |            |                      | 0.251423      |
| AAG (K) / TCC (S)       |            |                      | 0.251650      |
| GTA (V) / CGA (R)       |            |                      | 0.255147      |
| ATC (I) / TAC (Y)       |            |                      | 0.255975      |
| AAG (K) / ACA (T)       |            |                      | 0.256174      |
| AAT (N) / ATA (I)       |            |                      | 0.256283      |
| GAA (E) / TAT (Y)       |            |                      | 0.257122      |
| AAT (N) / CTT (L)       |            |                      | 0.259380      |
| AAC (N) / ACA (T)       |            |                      | 0.259909      |
| CCA (P) / TTA (L)       |            |                      | 0.261069      |
| GAG (E) / ATG (M)       |            |                      | 0.262465      |
| AAT (N) / TTT (F)       |            |                      | 0.263567      |
| TGG (W) / TGT (C)       |            |                      | 0.264556      |
| CAC (H) / TAT (Y)       |            |                      | 0.265766      |
| CTG (L) / TGC (C)       |            |                      | 0.265948      |
| CTG (L) / TCG (S)       |            |                      | 0.266943      |
| GCT (A) / AAG (K)       |            |                      | 0.268662      |
| AGG (R) / TAC (Y)       |            |                      | 0.269510      |
| AGT (Z) / ATA (I)       |            |                      | 0.269862      |
| ATC (I) / CCC (P)       |            |                      | 0.270274      |
| TGG (W) / TTA (L)       |            |                      | 0.271072      |
| AAT (N) / TTA (L)       |            |                      | 0.271628      |
| GCT (A) / CAA (Q)       |            |                      | 0.272950      |
| AGA (R) / AAC (N)       |            |                      | 0.273855      |
| AGG (R) / CCG (P)       |            |                      | 0.273876      |

| codon (AA) substitution | synonymous | ECM rate             |               |
|-------------------------|------------|----------------------|---------------|
|                         |            | synonymous SER (S/Z) | nonsynonymous |
| TCT (S) / TTG (L)       |            |                      | 0.274990      |
| AAA (K) / ATG (M)       |            |                      | 0.275355      |
| AGT (Z) / ACC (T)       |            |                      | 0.275865      |
| GGG (G) / GTG (V)       |            |                      | 0.276276      |
| GAA (E) / GTT (V)       |            |                      | 0.276499      |
| GTG (V) / TGG (W)       |            |                      | 0.277072      |
| CGT (R) / CAC (H)       |            |                      | 0.277265      |
| CTT (L) / TCT (S)       |            |                      | 0.277929      |
| TCA (S) / TTT (F)       |            |                      | 0.278090      |
| GGA (G) / AAC (N)       |            |                      | 0.280400      |
| GAG (E) / TCC (S)       |            |                      | 0.283432      |
| AAA (K) / CAG (Q)       |            |                      | 0.285384      |
| CCC (P) / TTC (F)       |            |                      | 0.285635      |
| CAT (H) / CCA (P)       |            |                      | 0.286252      |
| GCA (A) / CGA (R)       |            |                      | 0.286547      |
| GAA (E) / TTA (L)       |            |                      | 0.287373      |
| AAG (K) / ACT (T)       |            |                      | 0.291009      |
| ATT (I) / CCT (P)       |            |                      | 0.292855      |
| GGG (G) / AAC (N)       |            |                      | 0.293884      |
| GAG (E) / CCC (P)       |            |                      | 0.294294      |
| ATG (M) / TAT (Y)       |            |                      | 0.294368      |
| ACA (T) / ATT (I)       |            |                      | 0.296014      |
| AAC (N) / ACT (T)       |            |                      | 0.296066      |
| AAA (K) / CGC (R)       |            |                      | 0.296358      |
| GCA (A) / TGC (C)       |            |                      | 0.297371      |
| ATG (M) / TGT (C)       |            |                      | 0.298091      |
| GGA (G) / AGC (Z)       |            |                      | 0.298738      |
| CGG (R) / CAA (Q)       |            |                      | 0.299978      |
| ATG (M) / TAC (Y)       |            |                      | 0.300354      |
| AGC (Z) / CTC (L)       |            |                      | 0.300513      |
| AAG (K) / CCC (P)       |            |                      | 0.303613      |
| AGC (Z) / ATG (M)       |            |                      | 0.304581      |
| AGA (R) / ATG (M)       |            |                      | 0.305714      |
| AGT (Z) / ATG (M)       |            |                      | 0.306375      |
| GAA (E) / AGC (Z)       |            |                      | 0.308372      |
| GAA (E) / AAG (K)       |            |                      | 0.308851      |
| CTG (L) / TAC (Y)       |            |                      | 0.308859      |
| GGC (G) / TGC (C)       |            |                      | 0.309374      |
| ATC (I) / TGC (C)       |            |                      | 0.309643      |
| AGG (R) / ACT (T)       |            |                      | 0.309656      |
| CCC (P) / TAC (Y)       |            |                      | 0.310416      |
| ACG (T) / ATC (I)       |            |                      | 0.311759      |
| GTG (V) / AAG (K)       |            |                      | 0.311885      |
| GAA (E) / CTA (L)       |            |                      | 0.313495      |
| GTA (V) / ATC (I)       |            |                      | 0.313779      |
| GTG (V) / AGG (R)       |            |                      | 0.314379      |
| CGG (R) / CAT (H)       |            |                      | 0.316372      |
| AGG (R) / ATA (I)       |            |                      | 0.317466      |

| codon (AA) substitution | synonymous | ECM rate             |               |
|-------------------------|------------|----------------------|---------------|
|                         |            | synonymous SER (S/Z) | nonsynonymous |
| GCA (A) / ACG (T)       |            |                      | 0.318574      |
| GTT (V) / AAT (N)       |            |                      | 0.318595      |
| ATG (M) / TGG (W)       |            |                      | 0.321642      |
| AGT (Z) / CTT (L)       |            |                      | 0.322807      |
| ATG (M) / CAT (H)       |            |                      | 0.323588      |
| GCT (A) / ACA (T)       |            |                      | 0.324162      |
| GCT (A) / CGT (R)       |            |                      | 0.324227      |
| CCT (P) / TTT (F)       |            |                      | 0.324368      |
| AAG (K) / CAT (H)       |            |                      | 0.324525      |
| ATG (M) / TGC (C)       |            |                      | 0.324613      |
| GGA (G) / GTA (V)       |            |                      | 0.324696      |
| AAC (N) / TGC (C)       |            |                      | 0.325422      |
| GGT (G) / AGC (Z)       |            |                      | 0.326035      |
| CAC (H) / CTG (L)       |            |                      | 0.330036      |
| GAA (E) / TCT (S)       |            |                      | 0.330481      |
| CAG (Q) / TAC (Y)       |            |                      | 0.332396      |
| AAG (K) / TTG (L)       |            |                      | 0.333780      |
| AGC (Z) / AAA (K)       |            |                      | 0.334224      |
| GCA (A) / CCT (P)       |            |                      | 0.335924      |
| GGC (G) / CAG (Q)       |            |                      | 0.336277      |
| GTT (V) / CGT (R)       |            |                      | 0.336828      |
| TAT (Y) / TTG (L)       |            |                      | 0.337279      |
| CCT (P) / TAT (Y)       |            |                      | 0.337879      |
| GTT (V) / CAT (H)       |            |                      | 0.338207      |
| CAT (H) / TAC (Y)       |            |                      | 0.340541      |
| CGT (R) / CAG (Q)       |            |                      | 0.340811      |
| AAA (K) / TCT (S)       |            |                      | 0.340991      |
| TAT (Y) / TCA (S)       |            |                      | 0.341791      |
| CTC (L) / TCC (S)       |            |                      | 0.342813      |
| GAG (E) / CAA (Q)       |            |                      | 0.343314      |
| TGT (C) / TCC (S)       |            |                      | 0.343463      |
| ACT (T) / CGT (R)       |            |                      | 0.344601      |
| ACT (T) / CCA (P)       |            |                      | 0.345545      |
| AGC (Z) / TAC (Y)       |            |                      | 0.346890      |
| GCT (A) / CCA (P)       |            |                      | 0.346978      |
| GAT (D) / TCA (S)       |            |                      | 0.348448      |
| ACA (T) / TCG (S)       |            |                      | 0.349846      |
| GTC (V) / ATG (M)       |            |                      | 0.350473      |
| ACT (T) / ATA (I)       |            |                      | 0.351882      |
| ATT (I) / TAT (Y)       |            |                      | 0.352731      |
| CGA (R) / CCT (P)       |            |                      | 0.352807      |
| AGC (Z) / CGA (R)       |            |                      | 0.354545      |
| GGC (G) / TCG (S)       |            |                      | 0.356038      |
| AGT (Z) / ATT (I)       |            |                      | 0.359183      |
| AAT (N) / TGT (C)       |            |                      | 0.360038      |
| GAG (E) / ACC (T)       |            |                      | 0.360196      |
| ACA (T) / CGA (R)       |            |                      | 0.360575      |
| ACG (T) / TCT (S)       |            |                      | 0.361164      |

| codon (AA) substitution | synonymous | ECM rate             |               |
|-------------------------|------------|----------------------|---------------|
|                         |            | synonymous SER (S/Z) | nonsynonymous |
| GAA (E) / ATA (I)       |            |                      | 0.361403      |
| GAG (E) / GTG (V)       |            |                      | 0.362328      |
| ACG (T) / TGG (W)       |            |                      | 0.362681      |
| CAC (H) / CCG (P)       |            |                      | 0.364129      |
| ACA (T) / CCT (P)       |            |                      | 0.368538      |
| CAC (H) / TGG (W)       |            |                      | 0.369273      |
| GCT (A) / TAT (Y)       |            |                      | 0.370309      |
| CCG (P) / TCC (S)       |            |                      | 0.371063      |
| GTG (V) / TTC (F)       |            |                      | 0.371072      |
| ACC (T) / TTC (F)       |            |                      | 0.371541      |
| GAT (D) / AAC (N)       |            |                      | 0.371685      |
| GAG (E) / AAC (N)       |            |                      | 0.372719      |
| GCC (A) / AAG (K)       |            |                      | 0.373948      |
| ACT (T) / CAA (Q)       |            |                      | 0.374419      |
| GGA (G) / GAT (D)       |            |                      | 0.375097      |
| AAC (N) / CAA (Q)       |            |                      | 0.377447      |
| GGT (G) / ACT (T)       |            |                      | 0.380374      |
| GCC (A) / TAC (Y)       |            |                      | 0.380788      |
| GTC (V) / AGC (Z)       |            |                      | 0.381287      |
| GGG (G) / TGG (W)       |            |                      | 0.381671      |
| GCA (A) / ACT (T)       |            |                      | 0.381796      |
| AGC (Z) / CGT (R)       |            |                      | 0.387941      |
| GGT (G) / CAT (H)       |            |                      | 0.388156      |
| AGT (Z) / AAG (K)       |            |                      | 0.389004      |
| ATA (I) / CAA (Q)       |            |                      | 0.390087      |
| ATC (I) / CTT (L)       |            |                      | 0.390190      |
| ACC (T) / TAC (Y)       |            |                      | 0.393545      |
| GGC (G) / CCG (P)       |            |                      | 0.395771      |
| TGT (C) / TTG (L)       |            |                      | 0.395942      |
| GAT (D) / GCT (A)       |            |                      | 0.396521      |
| GTC (V) / TCC (S)       |            |                      | 0.396897      |
| ATA (I) / TCA (S)       |            |                      | 0.403435      |
| GGG (G) / GAC (D)       |            |                      | 0.403521      |
| AGA (R) / AGC (Z)       |            |                      | 0.403913      |
| ATG (M) / CGG (R)       |            |                      | 0.408680      |
| AGA (R) / CTA (L)       |            |                      | 0.409432      |
| ACA (T) / TCC (S)       |            |                      | 0.409721      |
| TGG (W) / TCG (S)       |            |                      | 0.410046      |
| GGG (G) / ATG (M)       |            |                      | 0.410199      |
| AGA (R) / CAT (H)       |            |                      | 0.411115      |
| AAA (K) / AAC (N)       |            |                      | 0.413957      |
| GCA (A) / GTG (V)       |            |                      | 0.415718      |
| ACA (T) / TGT (C)       |            |                      | 0.415775      |
| GCG (A) / CCC (P)       |            |                      | 0.417565      |
| GGT (G) / CCT (P)       |            |                      | 0.418802      |
| ACT (T) / ATG (M)       |            |                      | 0.419831      |
| GCT (A) / CAT (H)       |            |                      | 0.420580      |
| GGT (G) / TGT (C)       |            |                      | 0.420899      |

| codon (AA) substitution | synonymous | ECM rate             |               |
|-------------------------|------------|----------------------|---------------|
|                         |            | synonymous SER (S/Z) | nonsynonymous |
| CAG (Q) / CTC (L)       |            |                      | 0.422671      |
| CAG (Q) / TCC (S)       |            |                      | 0.423382      |
| AGA (R) / TTA (L)       |            |                      | 0.423774      |
| AGA (R) / TAT (Y)       |            |                      | 0.424321      |
| CGA (R) / CTT (L)       |            |                      | 0.424607      |
| GAC (D) / AAG (K)       |            |                      | 0.426684      |
| GTT (V) / ATG (M)       |            |                      | 0.430124      |
| ATT (I) / TGT (C)       |            |                      | 0.431456      |
| CCC (P) / TCG (S)       |            |                      | 0.432520      |
| AGA (R) / ACT (T)       |            |                      | 0.432918      |
| AAA (K) / CTA (L)       |            |                      | 0.433620      |
| ACC (T) / ATG (M)       |            |                      | 0.433759      |
| CAA (Q) / CCT (P)       |            |                      | 0.435109      |
| ACG (T) / CCC (P)       |            |                      | 0.435243      |
| CAT (H) / CTA (L)       |            |                      | 0.438648      |
| GAA (E) / CGA (R)       |            |                      | 0.440217      |
| AGC (Z) / ACA (T)       |            |                      | 0.441084      |
| ATG (M) / CAA (Q)       |            |                      | 0.443617      |
| GCG (A) / TGG (W)       |            |                      | 0.446015      |
| GCT (A) / ATG (M)       |            |                      | 0.451134      |
| GTG (V) / TCG (S)       |            |                      | 0.451899      |
| GAA (E) / CAT (H)       |            |                      | 0.452442      |
| AGG (R) / AAT (N)       |            |                      | 0.454347      |
| GTC (V) / ATT (I)       |            |                      | 0.458622      |
| AAC (N) / CAT (H)       |            |                      | 0.460970      |
| AAG (K) / CAA (Q)       |            |                      | 0.461383      |
| GCA (A) / AGA (R)       |            |                      | 0.461729      |
| GGA (G) / ACA (T)       |            |                      | 0.466770      |
| AAA (K) / TAT (Y)       |            |                      | 0.467136      |
| GAA (E) / GTA (V)       |            |                      | 0.469281      |
| GTG (V) / CAG (Q)       |            |                      | 0.475496      |
| GTG (V) / CTC (L)       |            |                      | 0.477439      |
| ATC (I) / TTG (L)       |            |                      | 0.478019      |
| ATA (I) / CCA (P)       |            |                      | 0.480521      |
| TAC (Y) / TTT (F)       |            |                      | 0.481042      |
| CAC (H) / TGC (C)       |            |                      | 0.483076      |
| GCT (A) / TTT (F)       |            |                      | 0.483563      |
| CTT (L) / TAT (Y)       |            |                      | 0.485469      |
| CAA (Q) / TAT (Y)       |            |                      | 0.486281      |
| ACT (T) / TCC (S)       |            |                      | 0.487317      |
| CCA (P) / TCT (S)       |            |                      | 0.487542      |
| AAC (N) / TAC (Y)       |            |                      | 0.487814      |
| GTC (V) / CAC (H)       |            |                      | 0.491034      |
| TGC (C) / TCG (S)       |            |                      | 0.493179      |
| AGA (R) / CCA (P)       |            |                      | 0.493508      |
| CCG (P) / CTG (L)       |            |                      | 0.495176      |
| CTA (L) / TCA (S)       |            |                      | 0.496046      |
| GGG (G) / GCC (A)       |            |                      | 0.496552      |

| codon (AA) substitution | synonymous | ECM rate             |               |
|-------------------------|------------|----------------------|---------------|
|                         |            | synonymous SER (S/Z) | nonsynonymous |
| AGG (R) / TGG (W)       |            |                      | 0.496706      |
| ACT (T) / TTT (F)       |            |                      | 0.497293      |
| AAG (K) / ATG (M)       |            |                      | 0.497593      |
| GCC (A) / ACG (T)       |            |                      | 0.498504      |
| CGT (R) / CCT (P)       |            |                      | 0.500433      |
| GTT (V) / AGT (Z)       |            |                      | 0.501456      |
| GAA (E) / GCT (A)       |            |                      | 0.502355      |
| TAT (Y) / TTC (F)       |            |                      | 0.503397      |
| CTG (L) / TGG (W)       |            |                      | 0.504866      |
| GCA (A) / TCG (S)       |            |                      | 0.505677      |
| AGT (Z) / TAT (Y)       |            |                      | 0.506470      |
| AGG (R) / TTG (L)       |            |                      | 0.506841      |
| CAA (Q) / TCT (S)       |            |                      | 0.508308      |
| GTA (V) / CTT (L)       |            |                      | 0.509595      |
| AGG (R) / ACA (T)       |            |                      | 0.511968      |
| GCC (A) / TTC (F)       |            |                      | 0.512203      |
| AGG (R) / TCG (S)       |            |                      | 0.514392      |
| ACG (T) / TCA (S)       |            |                      | 0.516594      |
| CGC (R) / TGC (C)       |            |                      | 0.516927      |
| GCA (A) / ATG (M)       |            |                      | 0.517896      |
| GGC (G) / ACC (T)       |            |                      | 0.518903      |
| TAC (Y) / TCC (S)       |            |                      | 0.524116      |
| AAG (K) / AAT (N)       |            |                      | 0.524647      |
| CGA (R) / CAC (H)       |            |                      | 0.526904      |
| ATG (M) / TCG (S)       |            |                      | 0.527005      |
| ACC (T) / CCG (P)       |            |                      | 0.527094      |
| GAG (E) / CGC (R)       |            |                      | 0.528692      |
| CAA (Q) / CTT (L)       |            |                      | 0.529045      |
| CAG (Q) / CCC (P)       |            |                      | 0.529594      |
| GTT (V) / TTG (L)       |            |                      | 0.529619      |
| GTG (V) / TGC (C)       |            |                      | 0.530278      |
| AGT (Z) / CGA (R)       |            |                      | 0.530881      |
| AAC (N) / CCC (P)       |            |                      | 0.532092      |
| CGT (R) / TAT (Y)       |            |                      | 0.534375      |
| GCT (A) / ATT (I)       |            |                      | 0.536332      |
| GCC (A) / ATC (I)       |            |                      | 0.536362      |
| GAA (E) / CAG (Q)       |            |                      | 0.536567      |
| CTT (L) / TGT (C)       |            |                      | 0.543240      |
| CCT (P) / TCA (S)       |            |                      | 0.544474      |
| CGC (R) / CTC (L)       |            |                      | 0.544828      |
| GGA (G) / CAA (Q)       |            |                      | 0.551493      |
| GTT (V) / CTA (L)       |            |                      | 0.555104      |
| GGA (G) / CCA (P)       |            |                      | 0.556204      |
| CGA (R) / TCA (S)       |            |                      | 0.557015      |
| GCA (A) / TCC (S)       |            |                      | 0.558500      |
| GTA (V) / AGA (R)       |            |                      | 0.560642      |
| AAG (K) / CGT (R)       |            |                      | 0.560831      |
| AAG (K) / CCG (P)       |            |                      | 0.561523      |

| codon (AA) substitution | synonymous | ECM rate             |               |
|-------------------------|------------|----------------------|---------------|
|                         |            | synonymous SER (S/Z) | nonsynonymous |
| TGC (C) / TTC (F)       |            |                      | 0.561620      |
| AGT (Z) / ACG (T)       |            |                      | 0.563566      |
| CGC (R) / CCC (P)       |            |                      | 0.563799      |
| CGC (R) / CTG (L)       |            |                      | 0.563956      |
| GTT (V) / TCT (S)       |            |                      | 0.563995      |
| GTA (V) / TTT (F)       |            |                      | 0.565566      |
| GCC (A) / AAC (N)       |            |                      | 0.565968      |
| GAG (E) / CAC (H)       |            |                      | 0.566034      |
| GGC (G) / CAC (H)       |            |                      | 0.566759      |
| GTA (V) / ATG (M)       |            |                      | 0.569076      |
| AAG (K) / CAC (H)       |            |                      | 0.571469      |
| GTT (V) / TAT (Y)       |            |                      | 0.571505      |
| ATA (I) / TAT (Y)       |            |                      | 0.573013      |
| GTT (V) / ATC (I)       |            |                      | 0.575921      |
| CAA (Q) / TTA (L)       |            |                      | 0.576476      |
| GTC (V) / TAC (Y)       |            |                      | 0.582801      |
| GGT (G) / GCA (A)       |            |                      | 0.585071      |
| GCG (A) / TGC (C)       |            |                      | 0.586111      |
| AGT (Z) / AAC (N)       |            |                      | 0.586685      |
| ACG (T) / TTG (L)       |            |                      | 0.586818      |
| GGG (G) / CGG (R)       |            |                      | 0.590833      |
| ACT (T) / TAT (Y)       |            |                      | 0.599932      |
| AGG (R) / AAC (N)       |            |                      | 0.600415      |
| GTG (V) / CCG (P)       |            |                      | 0.602428      |
| CGC (R) / TAC (Y)       |            |                      | 0.604541      |
| GAT (D) / AAA (K)       |            |                      | 0.604859      |
| GTA (V) / CAA (Q)       |            |                      | 0.606945      |
| TCA (S) / TTG (L)       |            |                      | 0.611887      |
| AAA (K) / TTA (L)       |            |                      | 0.612660      |
| CGA (R) / CAG (Q)       |            |                      | 0.617320      |
| ACC (T) / CAG (Q)       |            |                      | 0.617464      |
| CAC (H) / CTC (L)       |            |                      | 0.617694      |
| CTC (L) / TAC (Y)       |            |                      | 0.622089      |
| AGC (Z) / ACT (T)       |            |                      | 0.622868      |
| AAG (K) / ACC (T)       |            |                      | 0.623366      |
| CGA (R) / CCA (P)       |            |                      | 0.626603      |
| TGC (C) / TAC (Y)       |            |                      | 0.628438      |
| GGT (G) / GAT (D)       |            |                      | 0.629243      |
| TGG (W) / TTG (L)       |            |                      | 0.632947      |
| CAT (H) / TGT (C)       |            |                      | 0.634065      |
| GGG (G) / CAG (Q)       |            |                      | 0.634203      |
| GCC (A) / CAG (Q)       |            |                      | 0.634927      |
| GGC (G) / CCC (P)       |            |                      | 0.636916      |
| CAT (H) / TTT (F)       |            |                      | 0.638696      |
| GGA (G) / GAA (E)       |            |                      | 0.639125      |
| CGG (R) / CTC (L)       |            |                      | 0.640495      |
| GCT (A) / AAT (N)       |            |                      | 0.643160      |
| AGC (Z) / AAT (N)       |            |                      | 0.643789      |

| codon (AA) substitution | synonymous | ECM rate             |               |
|-------------------------|------------|----------------------|---------------|
|                         |            | synonymous SER (S/Z) | nonsynonymous |
| GAC (D) / CCG (P)       |            |                      | 0.644235      |
| TGT (C) / TTA (L)       |            |                      | 0.645571      |
| GTC (V) / CGC (R)       |            |                      | 0.648523      |
| CCC (P) / CTC (L)       |            |                      | 0.648769      |
| TCC (S) / TTC (F)       |            |                      | 0.656004      |
| GGA (G) / GCT (A)       |            |                      | 0.658541      |
| CGT (R) / TCT (S)       |            |                      | 0.660622      |
| GAT (D) / CCT (P)       |            |                      | 0.661776      |
| GCT (A) / GTA (V)       |            |                      | 0.662578      |
| CGT (R) / CTT (L)       |            |                      | 0.663877      |
| CAT (H) / CTT (L)       |            |                      | 0.664866      |
| AAA (K) / ATA (I)       |            |                      | 0.667397      |
| GAA (E) / AGA (R)       |            |                      | 0.668173      |
| GAC (D) / TCG (S)       |            |                      | 0.670108      |
| GGG (G) / GCA (A)       |            |                      | 0.672077      |
| CTC (L) / TGC (C)       |            |                      | 0.674176      |
| TTG (L) / TTC (F)       |            |                      | 0.675537      |
| GGC (G) / CGC (R)       |            |                      | 0.676049      |
| ATG (M) / TTT (F)       |            |                      | 0.679370      |
| AGT (Z) / TCG (S)       |            | 0.681575             |               |
| AAT (N) / CGT (R)       |            |                      | 0.682254      |
| GCC (A) / GTG (V)       |            |                      | 0.682579      |
| GGG (G) / AGT (Z)       |            |                      | 0.684968      |
| CGC (R) / TCC (S)       |            |                      | 0.685812      |
| TAT (Y) / TCT (S)       |            |                      | 0.688169      |
| TCG (S) / TTG (L)       |            |                      | 0.694091      |
| GCC (A) / CAC (H)       |            |                      | 0.696016      |
| GTG (V) / CGG (R)       |            |                      | 0.701399      |
| GAC (D) / GCG (A)       |            |                      | 0.702594      |
| GGG (G) / CCG (P)       |            |                      | 0.703092      |
| GGC (G) / CGG (R)       |            |                      | 0.703728      |
| CAG (Q) / CTG (L)       |            |                      | 0.703795      |
| GAT (D) / CAA (Q)       |            |                      | 0.706782      |
| GTA (V) / AAA (K)       |            |                      | 0.708204      |
| GTT (V) / CCT (P)       |            |                      | 0.708395      |
| GGA (G) / AAA (K)       |            |                      | 0.713961      |
| CAG (Q) / CCG (P)       |            |                      | 0.715716      |
| GGG (G) / ACG (T)       |            |                      | 0.716441      |
| GCA (A) / GTT (V)       |            |                      | 0.718719      |
| AAC (N) / TCG (S)       |            |                      | 0.725836      |
| CGT (R) / TGT (C)       |            |                      | 0.726908      |
| GCG (A) / ACC (T)       |            |                      | 0.728891      |
| CAC (H) / CCC (P)       |            |                      | 0.730306      |
| GTA (V) / CCA (P)       |            |                      | 0.732111      |
| ACG (T) / CTG (L)       |            |                      | 0.733202      |
| TGT (C) / TTT (F)       |            |                      | 0.733587      |
| GCA (A) / CTA (L)       |            |                      | 0.741135      |
| GGG (G) / AAG (K)       |            |                      | 0.744000      |

| codon (AA) substitution | synonymous | ECM rate             |               |
|-------------------------|------------|----------------------|---------------|
|                         |            | synonymous SER (S/Z) | nonsynonymous |
| GAT (D) / CAT (H)       |            |                      | 0.746792      |
| AAT (N) / TAT (Y)       |            |                      | 0.747870      |
| GTT (V) / TTA (L)       |            |                      | 0.748196      |
| CAA (Q) / CAC (H)       |            |                      | 0.751904      |
| TGT (C) / TCA (S)       |            |                      | 0.751980      |
| GTA (V) / TGT (C)       |            |                      | 0.754233      |
| GCG (A) / AAG (K)       |            |                      | 0.759132      |
| GTC (V) / CCC (P)       |            |                      | 0.760090      |
| CAC (H) / TTC (F)       |            |                      | 0.761771      |
| GTA (V) / TTG (L)       |            |                      | 0.762425      |
| AGG (R) / ACG (T)       |            |                      | 0.765495      |
| AAG (K) / TCG (S)       |            |                      | 0.768607      |
| GCT (A) / TCC (S)       |            |                      | 0.771771      |
| AGT (Z) / CGT (R)       |            |                      | 0.772349      |
| TCT (S) / TTT (F)       |            |                      | 0.773935      |
| CAT (H) / CCT (P)       |            |                      | 0.775254      |
| AGA (R) / ATA (I)       |            |                      | 0.780008      |
| TGG (W) / TTT (F)       |            |                      | 0.786871      |
| AAT (N) / CCT (P)       |            |                      | 0.787340      |
| CGG (R) / CTG (L)       |            |                      | 0.794366      |
| CGC (R) / CCG (P)       |            |                      | 0.798346      |
| TAT (Y) / TTA (L)       |            |                      | 0.798582      |
| ATG (M) / TTC (F)       |            |                      | 0.800602      |
| GAC (D) / GCC (A)       |            |                      | 0.802516      |
| ACC (T) / TGC (C)       |            |                      | 0.806071      |
| GCA (A) / TGT (C)       |            |                      | 0.806554      |
| GTA (V) / TCA (S)       |            |                      | 0.813720      |
| AAC (N) / ACG (T)       |            |                      | 0.822133      |
| GAG (E) / AGC (Z)       |            |                      | 0.822643      |
| TGT (C) / TAT (Y)       |            |                      | 0.822999      |
| ACT (T) / CTT (L)       |            |                      | 0.831215      |
| GAA (E) / AGT (Z)       |            |                      | 0.832592      |
| ATG (M) / CAG (Q)       |            |                      | 0.834976      |
| GCG (A) / ATG (M)       |            |                      | 0.837302      |
| ACA (T) / ATG (M)       |            |                      | 0.853779      |
| AAC (N) / CGC (R)       |            |                      | 0.863191      |
| GTT (V) / TTT (F)       |            |                      | 0.863970      |
| ACC (T) / CCC (P)       |            |                      | 0.870967      |
| ACA (T) / TTA (L)       |            |                      | 0.871568      |
| AAT (N) / TCA (S)       |            |                      | 0.872084      |
| AAA (K) / ACT (T)       |            |                      | 0.878163      |
| GCT (A) / CTT (L)       |            |                      | 0.879741      |
| GGC (G) / TCC (S)       |            |                      | 0.880032      |
| GAA (E) / CCA (P)       |            |                      | 0.890822      |
| GAA (E) / GAC (D)       |            |                      | 0.892903      |
| CGG (R) / CCC (P)       |            |                      | 0.897101      |
| ACC (T) / CTC (L)       |            |                      | 0.897490      |
| ACT (T) / CAT (H)       |            |                      | 0.898794      |

| codon (AA) substitution | synonymous | ECM rate             |               |
|-------------------------|------------|----------------------|---------------|
|                         |            | synonymous SER (S/Z) | nonsynonymous |
| AAA (K) / CAT (H)       |            |                      | 0.899262      |
| GAA (E) / GCA (A)       |            |                      | 0.905488      |
| AGG (R) / ATG (M)       |            |                      | 0.905810      |
| GGA (G) / AAT (N)       |            |                      | 0.909861      |
| GTG (V) / ATA (I)       |            |                      | 0.911193      |
| GAC (D) / CGC (R)       |            |                      | 0.915505      |
| CGA (R) / CTA (L)       |            |                      | 0.918198      |
| GCA (A) / AAA (K)       |            |                      | 0.923644      |
| GAC (D) / CAG (Q)       |            |                      | 0.928319      |
| AGC (Z) / AAG (K)       |            |                      | 0.928876      |
| GAT (D) / ACT (T)       |            |                      | 0.928969      |
| AGA (R) / AAT (N)       |            |                      | 0.936840      |
| GGA (G) / AGA (R)       |            |                      | 0.938439      |
| GAG (E) / GCC (A)       |            |                      | 0.938586      |
| ACA (T) / CTA (L)       |            |                      | 0.944560      |
| GTC (V) / TTC (F)       |            |                      | 0.946136      |
| GTG (V) / ATT (I)       |            |                      | 0.953353      |
| ACG (T) / CCG (P)       |            |                      | 0.962295      |
| GGG (G) / GAG (E)       |            |                      | 0.968146      |
| GCG (A) / GTC (V)       |            |                      | 0.968351      |
| ACC (T) / CAC (H)       |            |                      | 0.969387      |
| GCC (A) / CCG (P)       |            |                      | 0.971148      |
| GAA (E) / AAT (N)       |            |                      | 0.975582      |
| GAC (D) / CAC (H)       |            |                      | 0.975727      |
| GAC (D) / CCC (P)       |            |                      | 0.976175      |
| GGT (G) / TCT (S)       |            |                      | 0.976185      |
| GCA (A) / ATA (I)       |            |                      | 0.983926      |
| AAC (N) / CAG (Q)       |            |                      | 0.985145      |
| GAG (E) / CCG (P)       |            |                      | 0.990330      |
| ATC (I) / TTC (F)       |            |                      | 1.006045      |
| GAC (D) / ACC (T)       |            |                      | 1.013424      |
| ACA (T) / CCA (P)       |            |                      | 1.018005      |
| GAC (D) / TCC (S)       |            |                      | 1.023142      |
| GAG (E) / TCG (S)       |            |                      | 1.029128      |
| AGT (Z) / CCT (P)       |            |                      | 1.035015      |
| CTA (L) / TTT (F)       |            |                      | 1.036474      |
| AAG (K) / AAC (N)       |            |                      | 1.038682      |
| GCA (A) / TTA (L)       |            |                      | 1.041312      |
| AAA (K) / (P) CCA       |            |                      | 1.042457      |
| CTG (L) / TTA (L)       | 1.045943   |                      |               |
| AGC (Z) / TCA (S)       |            | 1.049877             |               |
| ACT (T) / CCT (P)       |            |                      | 1.050363      |
| CAA (Q) / CCA (P)       |            |                      | 1.052040      |
| ATA (I) / TTG (L)       |            |                      | 1.065537      |
| ACC (T) / ATC (I)       |            |                      | 1.066285      |
| CCA (P) / CTA (L)       |            |                      | 1.073790      |
| ATA (I) / TTT (F)       |            |                      | 1.075187      |
| GTC (V) / CTG (L)       |            |                      | 1.085170      |

| codon (AA) substitution | synonymous | ECM rate             |               |
|-------------------------|------------|----------------------|---------------|
|                         |            | synonymous SER (S/Z) | nonsynonymous |
| ACT (T) / TGT (C)       | 1.113671   |                      | 1.089585      |
| GAG (E) / GAT (D)       |            |                      | 1.091224      |
| AGA (R) / TCA (S)       |            |                      | 1.094736      |
| CAG (Q) / CAT (H)       |            |                      | 1.106179      |
| GTG (V) / TTG (L)       |            |                      | 1.108802      |
| GGC (G) / AAC (N)       |            |                      | 1.110726      |
| AGA (R) / CGC (R)       |            |                      |               |
| AAC (N) / TCC (S)       |            |                      | 1.118208      |
| ATT (I) / TTT (F)       |            |                      | 1.119411      |
| GAT (D) / TCT (S)       |            |                      | 1.120532      |
| CGG (R) / TGG (W)       |            |                      | 1.135910      |
| TGG (W) / TAT (Y)       |            |                      | 1.140051      |
| AAG (K) / ACG (T)       |            |                      | 1.144639      |
| CAC (H) / TCC (S)       |            |                      | 1.144692      |
| AGG (R) / CAG (Q)       |            |                      | 1.148387      |
| GGG (G) / AGC (Z)       |            |                      | 1.149846      |
| ATG (M) / ATT (I)       |            |                      | 1.155098      |
| CGT (R) / CAA (Q)       |            |                      | 1.164262      |
| CGG (R) / CCG (P)       |            |                      | 1.164525      |
| GAA (E) / ACA (T)       |            |                      | 1.164866      |
| AGT (Z) / CAA (Q)       |            |                      | 1.177718      |
| GGA (G) / AGT (Z)       |            |                      | 1.179053      |
| TGG (W) / TTC (F)       |            |                      | 1.183337      |
| TCA (S) / TTA (L)       |            |                      | 1.184813      |
| GCC (A) / CTC (L)       |            |                      | 1.191514      |
| GAG (E) / AGG (R)       |            |                      | 1.195790      |
| AGA (R) / AAG (K)       |            |                      | 1.197614      |
| TTG (L) / TTT (F)       |            |                      | 1.204356      |
| CAA (Q) / CTA (L)       |            |                      | 1.205738      |
| ATG (M) / CTT (L)       |            |                      | 1.220020      |
| GGC (G) / GAC (D)       |            |                      | 1.228004      |
| GCA (A) / CCA (P)       |            |                      | 1.236457      |
| AGA (R) / CAA (Q)       |            |                      | 1.242140      |
| AAT (N) / ACA (T)       |            |                      | 1.243753      |
| GAG (E) / GCG (A)       |            |                      | 1.251589      |
| CAT (H) / TCT (S)       |            |                      | 1.253945      |
| ATA (I) / CTT (L)       |            |                      | 1.260239      |
| GCG (A) / TCC (S)       |            |                      | 1.262618      |
| GAA (E) / TCA (S)       |            |                      | 1.265487      |
| ACT (T) / ATT (I)       |            |                      | 1.266654      |
| GCT (A) / CCT (P)       |            |                      | 1.272426      |
| GTC (V) / TGC (C)       |            |                      | 1.273908      |
| GCA (A) / CAA (Q)       |            |                      | 1.274118      |
| AGC (Z) / CAC (H)       |            |                      | 1.282522      |
| AGG (R) / AGC (Z)       |            |                      | 1.286990      |
| ATT (I) / TTG (L)       |            |                      | 1.292935      |
| AGT (Z) / CAT (H)       |            |                      | 1.293228      |
| AGT (Z) / AAA (K)       |            |                      | 1.293860      |

| codon (AA) substitution | synonymous | ECM rate             |               |
|-------------------------|------------|----------------------|---------------|
|                         |            | synonymous SER (S/Z) | nonsynonymous |
| AGA (R) / ACA (T)       | 1.373823   |                      | 1.316696      |
| AGC (Z) / CGC (R)       |            |                      | 1.320875      |
| GGT (G) / AAT (N)       |            |                      | 1.322234      |
| TGC (C) / TCC (S)       |            |                      | 1.323765      |
| ATT (I) / CTA (L)       |            |                      | 1.328581      |
| AGC (Z) / CCC (P)       |            |                      | 1.337629      |
| CTG (L) / TTC (F)       |            |                      | 1.341144      |
| AAC (N) / ACC (T)       |            |                      | 1.346385      |
| CGA (R) / CAT (H)       |            |                      | 1.353860      |
| AGC (Z) / CGG (R)       |            |                      | 1.360141      |
| AGC (Z) / TGC (C)       |            |                      | 1.372357      |
| CTC (L) / TTA (L)       |            |                      |               |
| ACG (T) / ATG (M)       |            |                      | 1.376727      |
| GCC (A) / CCC (P)       |            |                      | 1.394892      |
| GGC (G) / GCG (A)       |            |                      | 1.398079      |
| GTG (V) / ATG (M)       |            |                      | 1.399673      |
| AGC (Z) / CAG (Q)       |            |                      | 1.418383      |
| ATG (M) / TTA (L)       |            |                      | 1.418466      |
| TGG (W) / TAC (Y)       |            |                      | 1.421996      |
| ATG (M) / ATC (I)       |            |                      | 1.428293      |
| ATG (M) / CTC (L)       |            |                      | 1.434579      |
| GAG (E) / ACG (T)       |            |                      | 1.447392      |
| AGG (R) / AGT (Z)       |            |                      | 1.477696      |
| ACC (T) / CGC (R)       |            |                      | 1.481721      |
| AAA (K) / TCA (S)       |            |                      | 1.496628      |
| GCC (A) / TGC (C)       |            |                      | 1.514097      |
| CAG (Q) / TCG (S)       |            |                      | 1.519211      |
| AAA (K) / ACA (T)       |            |                      | 1.523251      |
| GCG (A) / CTG (L)       |            |                      | 1.524024      |
| GGG (G) / GCG (A)       |            |                      | 1.526141      |
| GCG (A) / CAG (Q)       |            |                      | 1.544626      |
| GGG (G) / AGG (R)       |            |                      | 1.558784      |
| ACG (T) / TCC (S)       |            |                      | 1.562591      |
| GAG (E) / AAG (K)       |            |                      | 1.563846      |
| GGT (G) / GCT (A)       |            |                      | 1.572808      |
| GTT (V) / TGT (C)       |            |                      | 1.598824      |
| GCC (A) / CGC (R)       |            |                      | 1.610248      |
| ATG (M) / CTA (L)       |            |                      | 1.635281      |
| AGA (R) / AGT (Z)       |            |                      | 1.644621      |
| ACA (T) / CAA (Q)       |            |                      | 1.660885      |
| GGA (G) / GCA (A)       |            |                      | 1.693998      |
| GAT (D) / AGT (Z)       |            |                      | 1.702817      |
| GGA (G) / TCA (S)       |            |                      | 1.720919      |
| AAT (N) / CAA (Q)       |            |                      | 1.759732      |
| ACG (T) / CAG (Q)       |            |                      | 1.766961      |
| AAA (K) / CGT (R)       |            |                      | 1.769879      |
| AAT (N) / TCT (S)       |            |                      | 1.773102      |
| GGC (G) / GCC (A)       |            |                      | 1.797671      |

| codon (AA) substitution | synonymous | ECM rate             |               |
|-------------------------|------------|----------------------|---------------|
|                         |            | synonymous SER (S/Z) | nonsynonymous |
| TGT (C) / TCT (S)       |            |                      | 1.811753      |
| GCT (A) / TCA (S)       |            |                      | 1.825878      |
| AGG (R) / AAA (K)       |            |                      | 1.868194      |
| GTT (V) / CTT (L)       |            |                      | 1.897150      |
| GCT (A) / TGT (C)       |            |                      | 1.899865      |
| CGG (R) / TCG (S)       |            |                      | 1.903571      |
| GCA (A) / TCT (S)       |            |                      | 1.931350      |
| GCG (A) / CCG (P)       |            |                      | 1.950083      |
| GCC (A) / TCG (S)       |            |                      | 1.978448      |
| GAC (D) / AGC (Z)       |            |                      | 2.005334      |
| AGT (Z) / TGT (C)       |            |                      | 2.007768      |
| CTT (L) / TTT (F)       |            |                      | 2.016257      |
| ACA (T) / TCT (S)       |            |                      | 2.018483      |
| CGC (R) / CAG (Q)       |            |                      | 2.029914      |
| GTA (V) / CTA (L)       |            |                      | 2.047159      |
| AAT (N) / ACT (T)       |            |                      | 2.057449      |
| CAA (Q) / TCA (S)       |            |                      | 2.066955      |
| AAA (K) / AAT (N)       |            |                      | 2.075154      |
| CCG (P) / TCG (S)       |            |                      | 2.075226      |
| ATT (I) / TTA (L)       |            |                      | 2.130663      |
| GCC (A) / ACC (T)       |            |                      | 2.159328      |
| GGG (G) / TCG (S)       |            |                      | 2.163175      |
| GAG (E) / CGG (R)       |            |                      | 2.171984      |
| AAC (N) / CAC (H)       |            |                      | 2.203539      |
| CGG (R) / CAC (H)       |            |                      | 2.208430      |
| GCG (A) / GTG (V)       |            |                      | 2.211488      |
| GCC (A) / AGC (Z)       |            |                      | 2.214735      |
| ATG (M) / ATA (I)       |            |                      | 2.230691      |
| ATG (M) / CTG (L)       |            |                      | 2.236557      |
| GAA (E) / AAA (K)       |            |                      | 2.258321      |
| ACA (T) / ATA (I)       |            |                      | 2.260424      |
| GTG (V) / CTG (L)       |            |                      | 2.262490      |
| AAG (K) / CAG (Q)       |            |                      | 2.285052      |
| ACT (T) / TCA (S)       |            |                      | 2.297807      |
| GTA (V) / TTA (L)       |            |                      | 2.299543      |
| CTC (L) / TTC (F)       |            |                      | 2.306110      |
| GCT (A) / AGT (Z)       |            |                      | 2.323091      |
| GCT (A) / ACT (T)       |            |                      | 2.359362      |
| GGT (G) / AGT (Z)       |            |                      | 2.382451      |
| GGC (G) / AGC (Z)       |            |                      | 2.392606      |
| TTA (L) / TTT (F)       |            |                      | 2.395822      |
| ACC (T) / TCG (S)       |            |                      | 2.395833      |
| AGT (Z) / ACA (T)       |            |                      | 2.397415      |
| AGA (R) / CGG (R)       | 2.418859   |                      |               |
| CGT (R) / CAT (H)       |            |                      | 2.460976      |
| ATC (I) / CTG (L)       |            |                      | 2.469249      |
| CAA (Q) / CAT (H)       |            |                      | 2.473439      |
| CGC (R) / CAC (H)       |            |                      | 2.478358      |

| codon (AA) substitution | synonymous | ECM rate             |               |
|-------------------------|------------|----------------------|---------------|
|                         |            | synonymous SER (S/Z) | nonsynonymous |
| CCC (P) / TCC (S)       |            |                      | 2.487136      |
| CAG (Q) / CAC (H)       |            |                      | 2.503268      |
| GTT (V) / ATA (I)       |            |                      | 2.577578      |
| GTA (V) / ATT (I)       |            |                      | 2.581654      |
| GCT (A) / GTT (V)       |            |                      | 2.600428      |
| GCC (A) / GTC (V)       |            |                      | 2.620833      |
| AAT (N) / CAT (H)       |            |                      | 2.691226      |
| GTC (V) / CTC (L)       |            |                      | 2.720153      |
| AAG (K) / CGC (R)       |            |                      | 2.721043      |
| GAC (D) / AAC (N)       |            |                      | 2.729647      |
| GCA (A) / ACA (T)       |            |                      | 2.735831      |
| GAA (E) / GAT (D)       |            |                      | 2.738552      |
| CCT (P) / TCT (S)       |            |                      | 2.846677      |
| GTC (V) / ACC (T)       |            |                      | 2.862216      |
| GCG (A) / ACG (T)       |            |                      | 2.866325      |
| AGC (Z) / ACG (T)       |            |                      | 2.871848      |
| GTT (V) / ACT (T)       |            |                      | 2.898791      |
| ACG (T) / CGG (R)       |            |                      | 2.985421      |
| GAG (E) / CAG (Q)       |            |                      | 3.036767      |
| ATG (M) / TTG (L)       |            |                      | 3.062807      |
| AAA (K) / CGA (R)       |            |                      | 3.065510      |
| GAA (E) / CAA (Q)       |            |                      | 3.081614      |
| CAT (H) / TAT (Y)       |            |                      | 3.088481      |
| GTG (V) / ACG (T)       |            |                      | 3.092500      |
| CCA (P) / TCA (S)       |            |                      | 3.121656      |
| CAC (H) / TAC (Y)       |            |                      | 3.193996      |
| GAG (E) / GAC (D)       |            |                      | 3.195698      |
| AAA (K) / CAA (Q)       |            |                      | 3.215817      |
| ATT (I) / CTT (L)       |            |                      | 3.330793      |
| GCG (A) / CGG (R)       |            |                      | 3.409178      |
| GCA (A) / GTA (V)       |            |                      | 3.415722      |
| GCC (A) / TCC (S)       |            |                      | 3.452570      |
| GTG (V) / ATC (I)       |            |                      | 3.487342      |
| GAT (D) / AAT (N)       |            |                      | 3.529593      |
| ATC (I) / CTC (L)       |            |                      | 3.765697      |
| ACC (T) / TCC (S)       |            |                      | 3.829580      |
| AAG (K) / CGG (R)       |            |                      | 3.832200      |
| GTA (V) / ACA (T)       |            |                      | 3.879355      |
| GCT (A) / TCT (S)       |            |                      | 3.994417      |
| AGG (R) / CGC (R)       | 4.087042   |                      |               |
| AGC (Z) / AAC (N)       |            |                      | 4.127466      |
| TAT (Y) / TTT (F)       |            |                      | 4.317981      |
| GCA (A) / TCA (S)       |            |                      | 4.380679      |
| ATA (I) / CTA (L)       |            |                      | 4.400610      |
| TAC (Y) / TTC (F)       |            |                      | 4.483501      |
| GCG (A) / TCG (S)       |            |                      | 4.658653      |
| ACT (T) / TCT (S)       |            |                      | 4.693944      |
| AGC (Z) / ACC (T)       |            |                      | 4.699375      |

| codon (AA) substitution | synonymous | ECM rate             |               |
|-------------------------|------------|----------------------|---------------|
|                         |            | synonymous SER (S/Z) | nonsynonymous |
| CGG (R) / CAG (Q)       | 4.802017   |                      | 4.718199      |
| CGA (R) / CAA (Q)       |            |                      | 4.725840      |
| CTG (L) / CTT (L)       |            |                      |               |
| ACG (T) / TCG (S)       |            |                      | 4.919174      |
| AGT (Z) / ACT (T)       |            |                      | 4.943439      |
| AGT (Z) / AAT (N)       | 5.140068   |                      | 4.971507      |
| GCG (A) / GCT (A)       |            |                      |               |
| ATA (I) / TTA (L)       |            |                      | 5.159075      |
| GGA (G) / GGC (G)       |            |                      |               |
| GTA (V) / GTC (V)       |            |                      |               |
| CTC (L) / TTG (L)       | 5.651603   |                      |               |
| ACA (T) / TCA (S)       |            |                      | 5.709933      |
| ATA (I) / ATC (I)       | 5.784672   |                      |               |
| AGA (R) / AAA (K)       |            |                      | 5.815294      |
| AGT (Z) / TCA (S)       |            | 5.964323             |               |
| GTT (V) / ATT (I)       | 6.746560   |                      | 6.546163      |
| GCA (A) / GCC (A)       |            |                      |               |
| AGG (R) / CGT (R)       |            |                      |               |
| AGG (R) / AAG (K)       |            |                      | 7.316623      |
| GTC (V) / ATC (I)       |            |                      | 7.487816      |
| CTG (L) / CTA (L)       | 8.319767   |                      |               |
| ACA (T) / ACC (T)       | 8.373639   |                      |               |
| CTA (L) / CTC (L)       | 8.808275   |                      |               |
| GTG (V) / GTT (V)       | 8.832621   |                      |               |
| GCC (A) / GCT (A)       | 9.612709   |                      |               |
| AGC (Z) / TCG (S)       |            | 9.818281             |               |
| CCG (P) / CCT (P)       | 10.291826  |                      |               |
| AGC (Z) / TCC (S)       |            |                      |               |
| GTC (V) / GTT (V)       | 10.956917  |                      |               |
| CTT (L) / TTG (L)       | 11.161511  |                      |               |
| GTA (V) / ATA (I)       |            |                      | 11.271062     |
| TCG (S) / TCT (S)       | 11.510965  |                      |               |
| GCG (A) / GCA (A)       | 11.561124  |                      |               |
| CTT (L) / TTA (L)       | 12.035723  |                      |               |
| ACG (T) / ACT (T)       | 12.116657  |                      |               |
| AGT (Z) / TCT (S)       |            | 12.169045            |               |
| CTG (L) / TTG (L)       | 12.455337  |                      |               |
| CGA (R) / CGC (R)       | 12.677657  |                      |               |
| CGG (R) / CGT (R)       | 12.868484  |                      |               |
| AAG (K) / AAA (K)       | 12.931524  |                      |               |
| GAG (E) / GAA (E)       | 12.984714  |                      |               |
| ATC (I) / ATT (I)       | 13.609310  |                      |               |
| GGC (G) / GGT (G)       | 13.935950  |                      |               |
| GTG (V) / GTA (V)       | 13.945647  |                      |               |
| GGG (G) / GGT (G)       | 13.981617  |                      |               |
| ACC (T) / ACT (T)       | 13.991583  |                      |               |
| GAC (D) / GAT (D)       | 14.214694  |                      |               |
| CCG (P) / CCA (P)       | 15.127582  |                      |               |

| codon (AA) substitution | synonymous | ECM rate             |               |
|-------------------------|------------|----------------------|---------------|
|                         |            | synonymous SER (S/Z) | nonsynonymous |
| AGG (R) / CGA (R)       | 15.287419  |                      |               |
| CCA (P) / CCC (P)       | 15.426733  |                      |               |
| CTG (L) / CTC (L)       | 15.484088  |                      |               |
| CTC (L) / CTT (L)       | 15.874441  |                      |               |
| TCA (S) / TCC (S)       | 15.982573  |                      |               |
| TTC (F) / TTT (F)       | 16.011531  |                      |               |
| ATA (I) / ATT (I)       | 16.415611  |                      |               |
| CTA (L) / TTG (L)       | 16.560966  |                      |               |
| TCG (S) / TCA (S)       | 17.424222  |                      |               |
| AGA (R) / CGT (R)       | 17.450524  |                      |               |
| AAC (N) / AAT (N)       | 17.634677  |                      |               |
| CAG (Q) / CAA (Q)       | 17.923045  |                      |               |
| AGG (R) / CGG (R)       | 18.531553  |                      |               |
| TTG (L) / TTA (L)       | 18.541946  |                      |               |
| GGG (G) / GGC (G)       | 18.675227  |                      |               |
| GTG (V) / GTC (V)       | 18.744445  |                      |               |
| GCG (A) / GCC (A)       | 19.373137  |                      |               |
| ACG (T) / ACA (T)       | 19.459275  |                      |               |
| GGA (G) / GGT (G)       | 21.171295  |                      |               |
| CTA (L) / CTT (L)       | 21.437257  |                      |               |
| CCC (P) / CCT (P)       | 23.496083  |                      |               |
| TCC (S) / TCT (S)       | 23.655090  |                      |               |
| TAC (Y) / TAT (Y)       | 24.177765  |                      |               |
| GCA (A) / GCT (A)       | 24.400553  |                      |               |
| GTA (V) / GTT (V)       | 25.313949  |                      |               |
| GGG (G) / GGA (G)       | 25.640860  |                      |               |
| CTA (L) / TTA (L)       | 27.219895  |                      |               |
| CGC (R) / CGT (R)       | 27.244097  |                      |               |
| ACG (T) / ACC (T)       | 28.470047  |                      |               |
| AGC (Z) / AGT (Z)       | 28.579806  |                      |               |
| CGG (R) / CGA (R)       | 30.574631  |                      |               |
| ACA (T) / ACT (T)       | 31.915858  |                      |               |
| AGA (R) / CGA (R)       | 31.949764  |                      |               |
| CCG (P) / CCC (P)       | 33.453780  |                      |               |
| TCG (S) / TCC (S)       | 35.359077  |                      |               |
| CGG (R) / CGC (R)       | 35.563093  |                      |               |
| TCA (S) / TCT (S)       | 35.921779  |                      |               |
| CAC (H) / CAT (H)       | 38.685701  |                      |               |
| CGA (R) / CGT (R)       | 39.595443  |                      |               |
| CCA (P) / CCT (P)       | 40.922701  |                      |               |
| AGG (R) / AGA (R)       | 43.916187  |                      |               |
| TGC (C) / TGT (C)       | 56.838378  |                      |               |
